# Supplementary material for: Inherited Continental Zircons in Oceanic Rocks – True or False
Source: Research Square preprint supplement (doi:10.21203/rs.3.rs-778290/v1), 2021-08-11
Supplement: Supplementary file 1 [file 2fbfda23cfc9be17211d57fc.xlsx]

## Sheet: Mount 1
25 February 2021, Department of Earth Science, The University of Bergen								Data for Tera-Wasserburg plot							Data for Wetherill plot									Dates
Identifier	Comments	f206c	206Pb	Uppm	Th/U	206Pb/204Pb	1s%	238U/206Pb	1s%	207Pb/206Pb	1s%	208Pb/206Pb	1s%	207Pb/235U	1s%	206Pb/238U	1s%	Rho	208Pb/232Th	1s%	207Pb/206Pb	2s (abs)	2ssys (abs)	206Pb/238U	2s (abs)	2ssys (abs)	207Pb/235U	2s (abs)	2ssys (abs)	208Pb/232Th	2s (abs)	2ssys (abs)
91500	Z_91500	0.407456	50598.3	80.9331	0.375838	-68.2685	-9.53749	5.65878	0.467579	0.0749699	0.788038	0.136481	15.7753	1.85117	0.707595	0.178915	0.459788	0.191141	0.0533462	1.13632	1033.15	30.683		1060.3	8.92198		1057.59	9.37121		1047.78	23.1769
91500	Z_91500	-0.0546188	49656.5	79.0413	0.374048	-62.1461	-10.573	5.65503	0.469616	0.0748496	0.790871	0.117366	1.23619	1.84872	0.713035	0.179375	0.468485	0.178963	0.054115	1.17142	1033.49	31.1838		1062.28	9.17584		1057.42	9.50733		1063.74	24.4044
91500	Z_91500	0.681664	53897	81.7073	0.37582	-56.4064	-12.3736	5.6227	0.471888	0.0742546	0.728597	0.118035	1.14146	1.8459	0.68172	0.180154	0.474933	0.250092	0.0547112	1.1054	1025.22	29.1931		1066.44	9.35337		1056.27	9.07575		1075.2	23.2161
91500	Z_91500	0.230982	51573.8	78.8514	0.374184	-67.4559	-9.87235	5.67683	0.47459	0.0755574	0.777291	0.114121	1.19964	1.85369	0.697051	0.178306	0.465189	0.188395	0.0528078	1.15424	1051.26	30.6741		1057.49	9.17085		1059.63	9.32568		1037.51	23.3516
GJ1	Z_GJ1	0.505709	143805	419.453	0.0174797	-161.19	-11.7977	10.4575	0.549435	0.0597644	0.612554	0.00596185	3.25982	0.800936	0.600379	0.0969518	0.554125	0.456907	0.0314468	3.2212	628.704	23.4696		596.284	6.33834		595.69	5.41561		620.266	39.5507
GJ1	Z_GJ1	0.281317	144002	418.808	0.0178161	-180.53	-10.4692	10.5115	0.548707	0.0605163	0.627993	0.0057691	3.38262	0.80852	0.645396	0.0961091	0.567006	0.468016	0.0290352	3.22645	647.029	23.4413		591.332	6.34604		598.965	5.81061		571.891	36.5634
GJ1	Z_GJ1	-0.132702	143417	399.709	0.0173288	-159.568	-11.7776	10.3358	0.502632	0.0607784	0.62173	0.00665221	5.75235	0.820565	0.599609	0.0978666	0.502986	0.336094	0.0347467	3.28497	647.001	23.9495		601.382	5.77789		605.425	5.50541		677.394	43.6026
GJ1	Z_GJ1	0.221082	149805	410.968	0.0174768	-153.474	-13.0027	10.1865	0.569695	0.0604622	0.609514	0.00559588	3.42583	0.835147	0.66897	0.099426	0.579078	0.541714	0.0297086	3.32796	653.752	23.1278		611.22	6.82762		613.994	6.17477		584.766	38.4855
Plesovice	Z_Plesovice	-0.221882	96959.7	510.513	0.09072	-124.683	-10.1579	18.9095	0.377453	0.0523902	0.64188	0.0284867	1.66873	0.386953	0.625003	0.053324	0.376817	0.274604	0.0162092	1.66027	435.029	23.3838		334.804	2.45766		331.489	3.59367		324.435	10.6962
Plesovice	Z_Plesovice	-0.159311	92291.4	485.642	0.0884252	-118.525	-10.3435	19.0868	0.371845	0.0531216	0.684623	0.0287692	1.70684	0.389727	0.640427	0.0527938	0.380148	0.191469	0.0165683	1.67127	470.208	25.5457		331.561	2.45634		333.123	3.65811		331.564	10.9968
Plesovice	Z_Plesovice	0.557743	94441	474.02	0.0893	-77.4299	-16.3883	18.6847	0.399651	0.0534696	0.659839	0.0295298	1.83479	0.400836	0.627577	0.0540131	0.386473	0.224094	0.0173019	1.76316	487.354	23.8066		339.018	2.55296		341.427	3.6442		346.034	12.1005
Plesovice	Z_Plesovice	0.480262	93424.2	474.598	0.0885696	-80.6288	-15.0684	19.0548	0.362578	0.0540826	0.676646	0.0290841	1.59183	0.397232	0.624862	0.0528911	0.361505	0.143335	0.0169894	1.56835	499.949	24.8124		332.161	2.33961		338.533	3.61071		339.951	10.5813
GS16A-ROV06-16-10-1	0616	-108.123	120.144	49.8158	0.608642	-0.224924	-30.9745	-521.093	-5.5504	0.0216408	96.6792	-0.0554847	-146.9	0.00601026	57.3344	0.00064543	12.1665	0.258952	0.000143302	93.9422	3373.64	170.592		4.14433	1.0103		2.1448	6.77863		2.75764	5.43029
GS16A-ROV06-16-29-1	0616	0.057151	157317	81.3903	0.690029	-183.949	-11.1522	1.89156	0.453274	0.189246	0.441682	0.198551	0.613696	13.9882	0.43813	0.533668	0.445698	0.376279	0.148957	0.62206	2724.37	14.411		2753.08	19.9624		2744.26	8.47603		2801.39	32.4662
GS16A-ROV06-16-08-1	0616	-122.596	57.0817	23.8528	1.35687	-0.0699394	-71.3439	-404.204	-3.74592	0.000217603	12739.9	-0.245138	-46.0678	0.00817731	89.7908	0.000637241	20.0019	-0.0325741	0.000221902	55.6264	3204.42	229.37		4.06715	1.63812		-4.18873	14.6606		4.36843	4.97923
238U/235U	137.818
BeamSecondsMaximum	60
BeamSecondsMethod	Laser log
BeamSecondsSensitivity	1000
DefaultFitType	Exponential
FitEndCrop	1
FitStartCrop	1
IndexChannel	U238
MaskChannel	U238
MaskMethod	Laser log
MaskResults	TRUE
MaskThreshold	1000
MaskTrim	0
ReferenceMaterial	Z_91500
UIsotopeCutoff	2000000
UIsotopeMode	U238
l232	4.9475e-11
l235	9.8485e-10
l238	1.55125e-10

## Sheet: Mount 2
26 February 2021, Department of Earth Science, The University of Bergen								Data for Tera-Wasserburg plot							Data for Wetherill plot									Dates
Identifier	Comments	f206c	206Pb	Uppm	Th/U	206Pb/204Pb	1s%	238U/206Pb	1s%	207Pb/206Pb	1s%	208Pb/206Pb	1s%	207Pb/235U	1s%	206Pb/238U	1s%	Rho	208Pb/232Th	1s%	207Pb/206Pb	2s (abs)	2ssys (abs)	206Pb/238U	2s (abs)	2ssys (abs)	207Pb/235U	2s (abs)	2ssys (abs)	208Pb/232Th	2s (abs)	2ssys (abs)
91500	Z_91500	0.933505	44531.1	80.1347	0.374925	2.34835	248.653	5.66628	0.508617	0.0778142	0.812891	0.1147	1.3747	1.85123	0.772839	0.17918	0.506565	0.262806	0.054159	1.24731	1117.92	31.9391	35.2281	1060.84	9.92267	21.8417	1054.22	10.3406	18.4782	1062.47	25.8451	35.5781
91500	Z_91500	1.29485	44482.9	79.637	0.374985	8.68005	67.5263	5.66582	0.513108	0.0776356	0.825039	0.115371	1.5067	1.85796	0.767698	0.179277	0.536085	0.228347	0.0540226	1.28463	1127.41	31.0543	34.1629	1062.54	10.32	21.7179	1058.07	10.3226	18.5237	1059.69	26.4928	35.9697
91500	Z_91500	1.809	45958.8	80.1678	0.375126	3.18043	183.623	5.66923	0.539777	0.0771444	0.826036	0.112975	1.50035	1.83823	0.767887	0.17901	0.530293	0.26926	0.0529204	1.24831	1096.77	31.2452	34.3657	1061.43	10.4181	22.1138	1051.95	10.0473	18.0311	1038.77	25.2788	34.7825
91500	Z_91500	1.73215	46347.5	79.9363	0.375481	-7.04783	-86.5185	5.6972	0.570257	0.0787634	0.83855	0.0779662	47.8417	1.86882	0.758656	0.179579	0.525911	0.00142731	0.0539672	1.24355	1129.64	31.4513	34.5035	1062.95	10.3153	22.0404	1059.6	10.1711	18.4063	1058.97	25.667	35.3809
91500	Z_91500	0.070229	46649.5	80.0087	0.37387	-27.136	-21.6125	5.68423	0.494747	0.0773437	0.805342	0.114844	1.26013	1.83263	0.725522	0.178633	0.491327	0.199251	0.0542665	1.20365	1093.26	31.0779	34.3355	1058.95	9.68642	21.8411	1050.06	9.56179	17.8546	1066.11	24.8783	34.8371
91500	Z_91500	1.64632	47033.5	80.0128	0.37562	-13.8238	-43.9909	5.68337	0.51528	0.0776835	0.812008	0.119831	7.22928	1.85142	0.749213	0.179404	0.532681	0.327429	0.0531221	1.24965	1110.55	31.2285	34.4509	1061.97	10.399	22.0009	1056.52	9.90198	18.0761	1042.85	25.3945	34.9245
91500	Z_91500	0.950901	47529	80.0435	0.376874	-11.2489	-53.5045	5.67281	0.495039	0.07731	0.764825	0.112423	1.27623	1.85589	0.707393	0.178973	0.492268	0.251683	0.0531939	1.19061	1104.68	29.5441	32.9602	1059.76	9.62596	21.6726	1058.43	9.36897	17.8171	1046.97	24.468	34.4469
91500	Z_91500	1.44332	47625.8	79.8842	0.373269	-16.6911	-36.1622	5.66074	0.4973	0.0771445	0.790015	0.114088	1.26429	1.84515	0.711438	0.179811	0.495272	0.224703	0.0547634	1.22466	1099.27	30.6395	33.9709	1064.36	9.71393	21.77	1053.24	9.4887	17.9704	1074.14	25.6201	35.5754
91500	Z_91500	1.00948	47775.6	80.0622	0.374794	-25.2303	-23.7454	5.66283	0.505834	0.0781243	0.786633	0.114548	1.30036	1.84883	0.722714	0.178702	0.510027	0.271843	0.0534861	1.17264	1118.36	30.4554	33.7939	1058.81	10.0081	21.891	1055.41	9.63822	18.0485	1050.09	24.0293	34.0871
91500	Z_91500	0.614392	47946.7	79.8515	0.375765	-14.8581	-40.8661	5.67721	0.504106	0.0784547	0.803629	0.114803	1.22972	1.84741	0.757188	0.178662	0.507284	0.24974	0.0532285	1.13313	1133.85	30.7524	33.9891	1058	9.9093	21.7873	1056.88	10.0163	18.1499	1045.33	23.1051	33.3556
91500	Z_91500	0.729203	48510.6	80.3316	0.375827	-4.83908	-132.89	5.6521	0.515217	0.0771581	0.810781	0.114312	1.2473	1.85826	0.754181	0.180164	0.496417	0.227048	0.0541459	1.16432	1092.89	31.0424	34.2549	1066.31	9.73829	21.7813	1058.56	10.0588	18.2782	1064.06	24.2665	34.5488
91500	Z_91500	0.908903	46615.2	79.8839	0.373755	-8.68612	-67.8758	5.67013	0.469949	0.0769062	0.810883	0.113466	1.24014	1.84456	0.74188	0.17876	0.472804	0.198599	0.0538098	1.15409	1098.02	30.4442	33.594	1058.71	9.23896	21.4895	1055.5	9.8367	18.0812	1057.49	23.8785	34.1497
GJ1	Z_GJ1	1.41482	163050	494.024	0.0175839	18.2598	120.047	10.0301	0.907297	0.0631335	0.78474	0.00637834	4.54681	0.870327	0.861642	0.103299	0.840516	0.454522	0.0346012	3.50072	762.323	28.5744	31.7211	632.051	10.0983	15.6285	629.848	7.86663	13.0756	676.151	46.7145	49.2957
GJ1	Z_GJ1	0.416046	163823	485.849	0.0183269	-9.79006	-218.307	9.85799	0.71498	0.0635514	0.7715	0.01145	44.9647	0.872396	0.762402	0.103456	0.721973	0.394593	0.0354448	3.55209	736.79	26.5484	29.568	632.746	8.59335	14.6129	630.648	6.92272	12.4859	691.797	47.0641	49.5922
GJ1	Z_GJ1	-0.0594683	166011	485.125	0.0174628	-30.9654	-72.7616	9.80603	0.841146	0.0622826	0.84205	0.00702727	10.9048	0.865526	0.842993	0.106387	0.903549	0.45534	0.036248	9.19504	735.168	29.148	31.9541	649.728	11.0571	16.431	629.05	8.09278	13.6458	644.379	46.4706	46.8516
GJ1	Z_GJ1	0.587451	164374	495.168	0.0184049	-33.8527	-64.264	10.0951	0.676651	0.0622947	0.691341	0.00616213	3.04832	0.852885	0.759221	0.100889	0.677862	0.503562	0.0327481	3.09999	717.169	25.1908	28.7153	618.579	7.96534	14.1315	620.7	6.89376	12.4696	643.2	39.4193	42.1778
GJ1	Z_GJ1	4.99952	166460	499.363	0.0177772	-41.4985	-50.3986	10.2143	0.754067	0.0641614	1.17485	0.0134528	49.0572	0.865176	1.30015	0.100665	0.773396	0.024754	0.0409346	11.1676	732.012	25.8609	27.1684	615.133	8.66714	14.1105	625.528	7.83238	10.4344	722.774	72.7764	73.1814
GJ1	Z_GJ1	0.963883	170172	509.27	0.0174838	-71.2411	-30.1386	10.3914	0.976655	0.062568	0.918233	0.00292071	140.026	0.851974	0.878086	0.100645	0.82292	0.361908	0.0225193	51.252	711.015	28.0004	30.2834	616.637	9.4151	14.759	619.247	7.63929	12.5518	690.202	67.9984	68.0165
GJ1	Z_GJ1	0.584425	167869	486.532	0.0183118	-50.6708	-43.3712	9.84919	0.652409	0.062221	0.654405	0.00620725	3.27347	0.836246	0.687838	0.103445	0.66536	0.532822	0.0328898	3.12379	704.92	24.6047	28.4197	633.522	8.0098	14.3818	613.765	6.32478	12.2765	648.126	40.1442	42.9121
GJ1	Z_GJ1	2.64333	170803	485.423	0.0179373	-49.6194	-42.8206	9.72847	0.697447	0.0618338	0.653601	0.00515917	11.4638	0.841548	0.740081	0.105557	0.716295	0.666373	0.032451	6.4371	688.715	24.5399	28.3536	645.553	8.76359	14.9727	615.741	6.69309	12.3248	668.311	60.4487	61.4555
GJ1	Z_GJ1	0.583389	172165	490.702	0.0176816	-46.761	-46.8864	9.73224	0.736748	0.0621373	0.738042	0.00583436	5.00301	0.846409	0.771073	0.105493	0.757792	0.536742	0.0333555	4.56125	730.79	27.0772	30.4267	642.28	8.83712	14.5643	619.477	6.95615	12.4486	651.57	42.3791	43.7737
GJ1	Z_GJ1	0.615757	167721	540.177	0.0184223	-70.8294	-29.4183	10.2551	0.73683	0.0627354	0.675372	0.0183994	62.1273	0.852213	0.663048	0.100505	0.626258	0.363222	0.0378991	7.14658	713.845	25.3374	29.0411	616.425	7.35001	13.7769	622.066	6.10525	12.1733	699.725	57.4807	58.2596
GJ1	Z_GJ1	0.475031	169571	571.98	0.0187094	15.4496	143.198	10.0497	0.625284	0.0621324	0.664136	0.00689135	3.47101	0.848144	0.699852	0.101471	0.728758	0.332094	0.0350103	3.12679	705.167	24.7609	28.4957	620.194	8.30014	14.027	621.715	6.58214	12.612	680.016	41.4204	44.2716
GJ1	Z_GJ1	0.198247	175920	620.9	0.019469	-0.0164887	-138752	10.0401	0.821055	0.0634087	1.1143	0.00841122	38.718	0.877838	0.854656	0.103453	0.952558	0.296363	0.0280654	22.0939	717.974	24.9889	26.3896	627.616	10.1947	14.7249	633.53	7.50276	12.5325	699.277	59.8714	59.9569
Plesovice	Z_Plesovice	0.0775267	235433	1279.73	0.158565	-45.3978	-66.8995	17.9775	0.352914	0.0547858	0.45004	0.0486589	0.824637	0.410482	0.456063	0.0560546	0.352648	0.394945	0.0172855	0.813728	445.256	17.0845	22.3182	351.492	2.41248	7.20211	348.91	2.68859	7.25677	346.529	5.61503	9.86123
Plesovice	Z_Plesovice	0.12446	236194	1286.5	0.157881	-65.7477	-44.6515	18.0464	0.335124	0.0543928	0.4347	0.0488468	0.81529	0.404787	0.455554	0.0557153	0.339556	0.414571	0.017338	0.800409	432.492	16.629	22.0437	349.672	2.31041	7.13479	344.464	2.68252	7.24803	347.267	5.51271	9.8187
Plesovice	Z_Plesovice	0.378449	236604	1283.8	0.157635	-40.4363	-74.9383	17.7703	0.37095	0.0544754	0.438976	0.04799	0.891711	0.413582	0.469104	0.0568546	0.373236	0.402088	0.0173689	0.82013	440.44	16.3299	21.5566	356.356	2.58799	7.34938	350.768	2.79443	7.36124	347.879	5.65764	9.91161
Plesovice	Z_Plesovice	0.3914	241798	1293.4	0.157534	-21.4188	-141.45	18.0666	0.351726	0.0546079	0.438883	0.0474041	0.847955	0.412719	0.469858	0.0558021	0.358258	0.331119	0.017021	0.846533	429.345	16.9198	22.3373	349.945	2.44001	7.18267	350.341	2.75245	7.24211	340.961	5.72354	9.81759
Plesovice	Z_Plesovice	0.114872	254273	1377.68	0.153731	-119.29	-26.182	18.3069	0.38217	0.0541247	0.413057	0.0471907	0.827648	0.405659	0.418907	0.055145	0.347107	0.199259	0.0173027	0.786182	408	16.1382	21.8832	345.937	2.3389	7.08403	345.373	2.45374	7.13379	346.573	5.40134	9.74035
Plesovice	Z_Plesovice	0.363282	263903	1449.87	0.152696	-78.7291	-41.7302	18.5737	0.33635	0.0547159	0.404074	0.0464522	0.843541	0.402897	0.436832	0.0542304	0.337938	0.464974	0.0167819	0.781984	430.586	15.7173	21.5299	340.358	2.24074	6.95175	343.061	2.54603	7.13554	336.241	5.21455	9.43839
Plesovice	Z_Plesovice	0.283671	240171	1255.42	0.159696	-85.183	-34.837	17.7354	0.354504	0.0551002	0.465543	0.0499882	0.877406	0.403446	0.462232	0.0567108	0.355179	0.0793713	0.0171066	0.78902	440.705	17.031	21.9445	355.489	2.45831	7.29855	343.364	2.69876	7.20438	342.684	5.36145	9.64491
Plesovice	Z_Plesovice	0.204216	247257	1289.31	0.159687	-69.7952	-45.4859	17.5563	0.358619	0.0546937	0.473895	0.0494202	0.846344	0.405968	0.48027	0.0573211	0.348158	0.0410593	0.0171317	0.804544	439.213	16.9024	21.627	359.358	2.44796	7.39197	345.159	2.80442	7.24528	343.182	5.47617	9.7201
Plesovice	Z_Plesovice	0.384176	244958	1284.32	0.159675	-54.9432	-55.9747	17.594	0.342932	0.0549576	0.438141	0.0486971	0.824383	0.408232	0.463952	0.0572161	0.355549	0.223296	0.0169318	0.807467	441.001	16.3494	21.5999	358.57	2.48019	7.35072	346.588	2.69441	7.17003	339.206	5.43293	9.6194
Plesovice	Z_Plesovice	-0.102457	163503	1105.24	0.111422	-82.2661	-24.6497	18.1397	0.387024	0.0542139	0.522722	0.0332015	1.2899	0.412346	0.543553	0.0555914	0.382137	0.413808	0.0167025	1.18566	453.92	19.5168	24.0913	348.645	2.59454	7.22568	349.987	3.20583	7.47415	334.472	7.86582	11.0964
Plesovice	Z_Plesovice	0.527053	162712	1160.08	0.110741	0.635053	3396.11	18.0232	0.378124	0.0547923	0.495392	0.0323788	1.17502	0.423606	0.530654	0.0559352	0.384087	0.434772	0.0164255	1.15614	449.01	19.3912	24.3982	350.894	2.60861	7.23243	357.795	3.20821	7.62776	329.017	7.54875	10.7852
GS16A-ROV06-16-51-2	06-16-51	0.684573	193137	180.876	0.600082	-63.9317	-41.5085	3.14139	0.446627	0.113048	0.461923	0.169802	0.65932	4.92059	0.477795	0.321352	0.450626	0.507006	0.0924903	0.674769	1835.52	16.8613	21.7938	1794.25	13.996	33.8694	1803.36	8.12908	21.1018	1788.17	23.2932	46.7281
GS16A-ROV06-16-55-2	06-16-55	0.367467	190562	321.054	0.329233	-40.7019	-59.537	5.70143	0.518617	0.0756679	0.480299	0.098587	0.730051	1.81687	0.486772	0.178465	0.419264	0.338621	0.05408	0.699468	1068.09	19.4781	24.7939	1059.04	8.22713	21.1483	1050.07	6.35293	16.2296	1063.41	14.4885	28.4126
GS16A-ROV06-16-22-2	06-16-22	-287.547	48.8253	28.4521	0.791817	-0.112875	-55.6963	-121.862	-13.467	0.00957313	276.704	-0.178047	-51.2528	0.0119129	79.9442	0.00069011	25.6925	0.0236645	0.000541987	52.7257	2964.33	65.6928	65.6928	4.39775	2.27982	2.28152	-6.07349	19.3831	19.3851	10.5493	11.5141	11.517
GS16A-ROV06-16-27-2	06-16-27	-48.3515	116.751	39.3987	0.795915	0.025477	237.276	-114.963	-16.0319	0.0132487	158.471	-0.0527544	-141.219	0.0110007	51.5087	0.00083148	12.6165	0.00740799	0.000442595	37.057	2975.11	65.8702	65.8704	5.33083	1.34963	1.3538	1.69238	11.2853	11.2881	8.73683	6.61548	6.61883
238U/235U	137.818
BeamSecondsMaximum	60
BeamSecondsMethod	Laser log
BeamSecondsSensitivity	1000
DefaultFitType	Exponential
FitEndCrop	1
FitStartCrop	1
IndexChannel	U238
MaskChannel	U238
MaskMethod	Laser log
MaskResults	TRUE
MaskThreshold	1000
MaskTrim	0
ReferenceMaterial	Z_91500
UIsotopeCutoff	2000000
UIsotopeMode	U238
l232	4.9475e-11
l235	9.8485e-10
l238	1.55125e-10

## Sheet: Mount 3
04 May 2021, Department of Earth Science, The University of Bergen								Data for Tera-Wasserburg plot							Data for Wetherill plot									Dates
Identifier	Comments	f206c	206Pb	Uppm	Th/U	206Pb/204Pb	1s%	238U/206Pb	1s%	207Pb/206Pb	1s%	208Pb/206Pb	1s%	207Pb/235U	1s%	206Pb/238U	1s%	Rho	208Pb/232Th	1s%	207Pb/206Pb	2s (abs)	2ssys (abs)	206Pb/238U	2s (abs)	2ssys (abs)	207Pb/235U	2s (abs)	2ssys (abs)	208Pb/232Th	2s (abs)	2ssys (abs)
91500	Z_91500	1.3153	53076.7	79.9466	0.373438	-137.363	-6.14439	5.70273	0.515966	0.0760319	0.780527	0.113769	1.27735	1.84103	0.740464	0.178107	0.510428	0.280446	0.0536365	1.21829	1061.47	30.5425	30.5425	1055.06	9.92911	13.0894	1051.09	9.83472	17.5374	1052.87	25.0056	36.7942
91500	Z_91500	-0.0524402	52913.9	79.8897	0.373682	-120.957	-6.26442	5.63814	0.526682	0.0761496	0.805202	0.112487	1.22302	1.85958	0.73361	0.179802	0.522727	0.244303	0.0544951	1.20299	1075.89	30.8247	30.8247	1065.39	10.356	13.5167	1062.55	9.74475	17.4885	1069.32	25.0635	37.1325
91500	Z_91500	0.40614	55597.1	80.1859	0.375039	-121.273	-6.23973	5.72472	0.533851	0.0757538	0.778275	0.109948	1.21906	1.82903	0.725775	0.17764	0.534447	0.255354	0.0527677	1.16127	1061.89	30.7294	30.7294	1052.96	10.3048	13.3287	1047.28	9.55824	17.2816	1036.57	23.49	35.4867
91500	Z_91500	1.81882	58870.6	80.0077	0.377184	-83.0108	-8.95608	5.62964	0.503815	0.0760913	0.772942	0.11097	1.18828	1.85745	0.708614	0.180604	0.528521	0.252608	0.0541496	1.14834	1069.17	30.3766	30.3766	1068.56	10.3786	13.485	1060.02	9.57294	17.6001	1065.64	24.0481	36.5558
91500	Z_91500	-0.218066	59672.7	79.9348	0.379029	-77.6204	-9.41704	5.65543	0.491944	0.0769174	0.780245	0.113596	1.26816	1.86644	0.714767	0.179759	0.512634	0.0852752	0.0539104	1.13509	1080.97	29.0682	29.0682	1064.06	10.0397	13.211	1060.34	9.42581	17.2248	1058.51	23.4391	35.8664
91500	Z_91500	0.709049	54319.4	79.8816	0.372936	-72.9634	-9.12855	5.68229	0.510228	0.0759547	0.771505	0.111932	1.30101	1.84013	0.709607	0.178941	0.510095	0.260895	0.0535333	1.24911	1058.88	30.1383	30.1383	1059.61	9.96914	13.1458	1051.6	9.4066	17.2773	1050.75	25.5666	37.1191
91500	Z_91500	0.486544	54141.9	80.0295	0.371845	-52.0995	-12.1493	5.70893	0.530814	0.076673	0.787093	0.111814	1.25626	1.84529	0.713864	0.178344	0.53479	0.243408	0.0538277	1.23025	1091.64	30.197	30.197	1056.2	10.4091	13.4603	1055.28	9.50312	17.3814	1059.19	25.3209	37.0595
91500	Z_91500	2.93839	57027.2	80.0034	0.37508	-53.2402	-12.7467	5.61035	0.468711	0.0763152	0.732959	0.110228	1.22204	1.87379	0.689018	0.180408	0.473774	0.218669	0.0536508	1.13517	1069.87	29.7121	29.7121	1068.33	9.3747	12.7732	1065.33	9.33398	17.5059	1053.57	23.3232	35.6882
91500	Z_91500	-0.211764	57118.9	80.0285	0.373006	-39.133	-15.9883	5.65709	0.516532	0.0753865	0.767186	0.111949	1.24207	1.83772	0.721729	0.179533	0.508524	0.255531	0.0540612	1.19944	1052.84	29.88	29.88	1063.4	9.91694	13.0941	1050.4	9.57979	17.388	1062.4	24.9409	37.0105
91500	Z_91500	-0.00525391	60021.6	80.0522	0.377941	-40.2276	-16.5811	5.67054	0.505573	0.0765016	0.768717	0.111445	1.19725	1.86394	0.732743	0.179433	0.496436	0.262292	0.0534837	1.14698	1072.67	30.281	30.281	1062.38	9.71316	12.9591	1059.49	9.71712	17.4531	1050.32	23.4814	35.7194
91500	Z_91500	0.0157587	58853.3	79.9789	0.374354	-44.8256	-14.4562	5.6734	0.524709	0.076006	0.786254	0.109528	1.2762	1.8388	0.720777	0.178895	0.527467	0.242856	0.0535898	1.23585	1062.74	31.073	31.073	1059.25	10.3016	13.3959	1052.37	9.53597	17.3244	1051.89	25.3369	36.993
91500	Z_91500	0.385896	57039.8	79.9957	0.374174	-32.7605	-19.2311	5.70074	0.573426	0.0766824	0.841129	0.105716	9.65588	1.84282	0.762777	0.179512	0.545954	0.191837	0.0541352	1.15837	1079.97	31.2809	31.2809	1061.75	10.5761	13.5645	1052.36	10.0734	17.6046	1062.7	24.0098	36.3186
91500	Z_91500	0.227894	60049.2	79.9864	0.374129	-41.591	-16.1932	5.74403	0.516567	0.0772081	0.783966	0.109769	1.1981	1.84194	0.715926	0.176863	0.513671	0.116075	0.0532995	1.1843	1079.29	30.1183	30.1183	1048.78	9.99125	13.136	1051.61	9.44583	17.2418	1047.92	24.2777	36.2737
91500	Z_91500	0.42854	62344	80.1342	0.378155	-30.0972	-23.2128	5.67959	0.49476	0.0761334	0.756529	0.111214	1.1783	1.84572	0.7085	0.179019	0.487352	0.206439	0.0534709	1.10396	1077.46	30.0563	30.0563	1060.18	9.52064	12.8066	1056.1	9.2861	17.0748	1050.27	22.6207	35.1759
91500	Z_91500	-0.0370602	59384.4	79.8483	0.373722	-42.8607	-15.1093	5.64076	0.491945	0.0764144	0.735296	0.111286	1.18019	1.86021	0.681039	0.180029	0.485995	0.247054	0.0543183	1.13947	1074.25	29.8837	29.8837	1065.69	9.53812	12.8461	1060.28	9.20666	17.4122	1068.82	23.9383	36.5493
91500	Z_91500	0.896891	61371.5	80.0472	0.375293	-38.9937	-17.2571	5.64433	0.490919	0.0763884	0.695155	0.111008	1.1716	1.85714	0.644587	0.179968	0.48864	0.266026	0.0536124	1.11335	1074.26	27.7767	27.7767	1065.34	9.59389	12.8899	1060.48	8.57232	16.878	1052.93	22.8476	35.355
91500	Z_91500	0.994092	62384.6	80.0173	0.374881	-34.4985	-19.8254	5.67431	0.481158	0.0762563	0.713271	0.111575	1.14653	1.84385	0.661691	0.178814	0.480701	0.219661	0.0537732	1.06662	1076.85	27.5599	27.5599	1060.11	9.47932	12.8302	1054.57	8.72476	16.8498	1056.22	21.958	34.8523
GJ1	Z_GJ1	0.684368	215038	502.7	0.018257	-240.273	-11.0875	9.91786	0.317596	0.061171	0.447926	0.00574044	3.26781	0.84747	0.435643	0.10141	0.316293	0.339425	0.0324383	3.2368	638.637	18.4271	18.4271	622.654	3.77381	6.45033	621.597	4.07061	10.9962	638.986	41.1388	44.4029
GJ1	Z_GJ1	0.146035	213616	489.337	0.0180358	-227.594	-12.1941	9.98496	0.340669	0.0606547	0.441276	0.00564271	3.35417	0.837563	0.458443	0.10081	0.334366	0.419546	0.0321681	3.39075	625.471	18.3298	18.3298	618.908	3.94669	6.50824	616.207	4.26364	11.0249	633.084	42.7477	45.8484
GJ1	Z_GJ1	0.482642	204673	450.823	0.0179974	-262.312	-9.20381	9.92254	0.343181	0.0609551	0.454692	0.00526436	3.5257	0.845207	0.439658	0.101645	0.345536	0.34084	0.0299864	3.46896	634.818	18.7289	18.7289	623.776	4.10551	6.63276	620.759	4.12653	11.0595	588.818	40.6223	43.4416
GJ1	Z_GJ1	0.691674	200019	566.761	0.0182149	-221.384	-11.3037	9.97598	0.327423	0.0617339	0.468618	0.00547161	3.57993	0.848175	0.440399	0.101012	0.326995	0.317908	0.0302022	3.5501	652.351	19.2709	19.2709	620.102	3.86718	6.46848	622.375	4.14542	11.094	594.885	42.0132	44.802
GJ1	Z_GJ1	0.861523	202176	615.777	0.0179172	-278.14	-9.10333	10.123	0.317269	0.061019	0.443603	0.00529791	3.68988	0.828589	0.417058	0.0994899	0.312633	0.276619	0.0295974	3.73394	631.428	18.5183	18.5183	611.208	3.64652	6.28078	611.971	3.80894	10.6862	582.414	43.4277	46.0412
GJ1	Z_GJ1	0.480005	208626	542.899	0.0181325	-198.665	-12.4233	10.0703	0.331914	0.060511	0.449039	0.00556915	3.53775	0.82513	0.420587	0.0999312	0.329839	0.30144	0.031338	3.58053	624.617	18.1205	18.1205	614.187	3.82285	6.359	609.612	3.87513	10.7923	613.981	43.7616	46.6179
GJ1	Z_GJ1	1.0295	210078	552.288	0.0181463	-159.081	-17.3501	10.0093	0.317697	0.0602051	0.450835	0.0055194	3.53824	0.825505	0.44127	0.100711	0.336096	0.143669	0.0303208	3.53089	605.13	18.6373	18.6373	618.329	3.95307	6.49777	609.908	4.0867	10.9184	594.945	41.7138	44.5111
GJ1	Z_GJ1	0.453323	210683	487.635	0.0179529	-109.907	-25.1379	9.98071	0.307231	0.0604637	0.434682	0.00537926	3.57363	0.829479	0.423055	0.100832	0.306274	0.325795	0.0304281	3.57855	614.712	18.0725	18.0725	619.269	3.63397	6.34583	612.02	3.8761	10.7402	601.57	43.1382	45.9571
GJ1	Z_GJ1	0.322996	211805	500.705	0.0179948	-123.085	-18.9198	9.98432	0.331387	0.0606342	0.447967	0.00571832	3.37134	0.831577	0.442679	0.100893	0.337417	0.384438	0.0325274	3.389	616.955	18.5313	18.5313	619.386	3.98296	6.53076	613.012	4.1057	10.9392	637.636	42.9102	46.0249
GJ1	Z_GJ1	0.589584	216031	482.35	0.0180191	-120.385	-19.6137	10.0242	0.298764	0.0611045	0.4224	0.00585978	3.76851	0.836403	0.417064	0.100386	0.298222	0.312944	0.0324971	3.39385	635.95	17.9514	17.9514	616.478	3.50439	6.2311	616.096	3.8106	10.6908	637.051	42.9075	46.0147
GJ1	Z_GJ1	0.797746	219887	478.945	0.0179714	-128.535	-24.7588	9.96288	0.337115	0.0605413	0.455087	0.00666736	14.2303	0.830452	0.444887	0.101139	0.348585	0.169496	0.0331319	3.27969	615.951	18.8139	18.8139	620.811	4.13211	6.63983	612.822	4.11075	10.8627	649.806	42.0532	45.3062
GJ1	Z_GJ1	0.558442	220150	475.649	0.01811	-165.248	-14.9437	10.0155	0.312585	0.0605107	0.401751	0.00526207	3.55291	0.827381	0.429498	0.10029	0.313278	0.437304	0.0291969	3.55359	608.372	17.2463	17.2463	616.096	3.66161	6.29838	610.804	3.9249	10.7337	573.335	40.5606	43.2477
Plesovice	Z_Plesovice	-0.272136	181765	700.355	0.100403	-256.827	-8.59302	17.8658	0.373054	0.0536205	0.537481	0.0294135	1.25178	0.41143	0.504289	0.0564149	0.374547	0.319974	0.016982	1.24774	438.025	20.7711	20.7711	353.681	2.57814	3.96922	349.337	3.00601	7.17638	340.004	8.41604	12.225
Plesovice	Z_Plesovice	0.451609	184159	683.158	0.0991169	-243.53	-9.56817	17.7537	0.374665	0.0539356	0.5072	0.0299586	1.2501	0.418086	0.500451	0.0568476	0.364698	0.382646	0.0176426	1.22271	433.006	18.7101	18.7101	356.324	2.5278	3.95283	353.949	2.97346	7.14385	353.115	8.56533	12.5764
Plesovice	Z_Plesovice	0.63262	191733	1085.91	0.0997817	-269.859	-8.95605	18.1039	0.368552	0.0540466	0.506208	0.0297712	1.16951	0.41076	0.494749	0.0557404	0.365339	0.342525	0.0169948	1.1798	437.656	18.9973	18.9973	349.571	2.48583	3.88318	349.189	2.94985	7.1546	340.296	7.96387	11.9239
Plesovice	Z_Plesovice	0.741292	167985	965.306	0.0968223	-218.587	-9.57226	17.9778	0.354003	0.0533036	0.510846	0.0291089	1.35233	0.408489	0.517301	0.0560597	0.358369	0.33947	0.0172612	1.34028	423.571	19.3267	19.3267	351.652	2.46416	3.89373	346.855	3.04174	7.11158	345.484	9.18233	12.8621
Plesovice	Z_Plesovice	0.457662	187983	983.413	0.0972728	-140.804	-15.1281	18.2468	0.381891	0.054185	0.461655	0.0295702	1.19764	0.409336	0.486762	0.0554033	0.389535	0.446175	0.0169216	1.17595	433.163	17.8798	17.8798	347.5	2.63429	3.96621	347.891	2.86741	7.0494	339.292	7.95059	11.9254
Plesovice	Z_Plesovice	-0.13776	178199	893.772	0.0970482	-164.919	-19.788	18.0965	0.377963	0.054364	0.500706	0.029238	1.22675	0.412677	0.503327	0.0557811	0.370214	0.407069	0.0170048	1.22491	448.562	18.6517	18.6517	349.816	2.51972	3.90563	350.54	3.04001	7.26911	340.47	8.27426	12.1382
Plesovice	Z_Plesovice	0.696537	192614	922.801	0.0973179	-111.262	-21.4571	17.9579	0.36192	0.0538641	0.485355	0.0284654	1.26913	0.41278	0.501483	0.0562843	0.368827	0.49193	0.0164535	1.25356	427.46	18.0369	18.0369	352.887	2.53112	3.93195	349.985	2.97407	7.13306	329.516	8.19534	11.8764
Plesovice	Z_Plesovice	0.500286	182578	861.005	0.0961786	-73.7144	-27.6423	18.1192	0.330855	0.053718	0.489483	0.0289419	1.24156	0.406869	0.495231	0.0555154	0.332522	0.347137	0.0166605	1.20439	430.213	17.7596	17.7596	348.214	2.2535	3.72925	345.923	2.8938	7.01303	333.651	7.97519	11.8074
Plesovice	Z_Plesovice	0.219951	173458	767.698	0.0954725	-37.637	-52.3145	18.0096	0.358764	0.054177	0.478406	0.0285704	1.28401	0.412714	0.47498	0.0559122	0.351863	0.371751	0.0171642	1.28899	436.138	18.2385	18.2385	350.761	2.4142	3.85725	350.627	2.86299	7.18466	343.594	8.78557	12.5489
Plesovice	Z_Plesovice	0.645992	172172	775.557	0.0949022	-60.0833	-32.0612	18.0741	0.34563	0.0541165	0.485523	0.0286364	1.31951	0.411079	0.483199	0.0557577	0.3451	0.473187	0.0169709	1.28649	427.282	18.6878	18.6878	349.686	2.34814	3.7966	348.834	2.84843	7.04601	339.761	8.67191	12.3985
Plesovice	Z_Plesovice	0.72711	158879	604.017	0.0937014	-122.263	-14.5993	18.0691	0.381986	0.0538159	0.533986	0.0278604	1.43153	0.407426	0.553117	0.0558346	0.38924	0.42155	0.0168245	1.4113	437.904	19.8615	19.8615	350.132	2.65149	3.99387	346.138	3.25968	7.22045	337.311	9.48699	12.966
Plesovice	Z_Plesovice	0.841462	159578	593.973	0.0942539	-139.384	-13.3893	17.9305	0.360014	0.0540215	0.537989	0.0282617	1.44675	0.412916	0.536779	0.0562816	0.360348	0.322836	0.0171137	1.38498	446.823	20.079	20.079	352.875	2.47427	3.89685	349.955	3.17958	7.21421	343.076	9.46515	13.051
Mudtank	Mudtank	5.57432	10217.6	17.7986	0.572623	-16.2408	-8.45045	9.10667	1.08936	0.069802	2.33235	0.192006	2.61697	1.06885	2.13637	0.118242	0.997735	0.0315944	0.0377462	2.43542	1320.61	61.4508	61.4508	718.271	13.4929	14.7383	689.322	22.7727	25.5813	744.383	35.7712	40.6508
Mudtank	Mudtank	0.38613	10549.8	17.8463	0.573348	-16.6192	-8.47528	8.94554	0.9765	0.0688059	2.42523	0.182847	2.81116	1.05663	2.20613	0.119247	0.969074	-0.0144889	0.0359927	2.50883	1270.52	62.9441	62.9441	723.441	13.2397	14.5317	685.901	23.0675	25.7445	710.344	35.298	39.8744
Mudtank	Mudtank	9.20319	10695.1	19.082	0.584456	-11.1559	-11.4564	8.85573	0.956982	0.0690738	2.20128	0.195167	2.72596	1.07767	2.03105	0.118836	0.931408	0.0763636	0.0371736	2.41396	1251.74	60.9159	60.9159	722.017	12.7849	14.1307	702.091	21.4542	24.3648	731.598	34.7848	39.6092
Mudtank	Mudtank	12.1683	10846.2	20.3	0.581808	-12.09	-10.8735	8.90751	1.04306	0.0688094	2.28661	0.188781	2.61558	1.06099	2.07061	0.120128	1.00515	0.00635357	0.0361552	2.34025	1264.21	62.2062	62.2062	728.261	13.8233	15.0812	689.912	21.9829	24.8588	714.171	33.0967	37.9621
Mudtank	Mudtank	10.867	10065	21.6911	0.585396	-8.24923	-14.5	8.97175	1.01023	0.0673892	2.23097	0.183775	2.88689	1.05145	2.10448	0.118879	0.945916	0.148281	0.0352525	2.71323	1286.39	60.8767	60.8767	721.457	12.9066	14.2257	690.915	22.7017	25.5821	693.249	37.1696	41.3041
Mudtank	Mudtank	16.6254	10681.3	22.5808	0.575743	-9.01594	-14.3569	8.88643	0.993467	0.0672941	2.18279	0.183101	2.67314	1.05945	2.05214	0.119674	0.979744	0.120372	0.0362235	2.45266	1295.24	59.2401	59.2401	726.514	13.5246	14.8172	696.473	22.3572	25.3318	713.161	34.5315	39.1803
Mudtank	Mudtank	6.65589	10792.2	20.208	0.576847	-3.46853	-34.6592	8.93202	1.0147	0.0641745	2.1047	0.180258	2.74683	1.0254	2.02527	0.119686	0.958182	0.135886	0.0366311	2.4753	1184.34	61.0026	61.0026	726.777	13.2002	14.5165	680.177	21.5091	24.4427	722.766	35.39	40.072
Mudtank	Mudtank	7.08299	10680.3	19.8415	0.585884	-4.02709	-29.8904	8.83033	0.943002	0.0707799	2.21934	0.191783	2.6881	1.09226	1.98169	0.119644	0.915593	0.00829026	0.038215	2.40788	1255.88	61.2383	61.2383	726.697	12.6407	14.0153	712.013	20.8327	23.7926	753.571	35.8748	40.8742
Mudtank	Mudtank	11.0991	10709.7	22.3072	0.586897	-7.41034	-16.7857	8.82971	0.921522	0.0677716	2.22194	0.191138	2.60513	1.05593	2.08216	0.119052	0.907477	0.0408881	0.0365576	2.31381	1285.96	60.6885	60.6885	723.359	12.4719	13.8514	689.037	22.9112	25.8773	720.268	32.888	37.8261
Mudtank	Mudtank	5.19833	10931.9	22.0829	0.586787	-6.39341	-19.856	8.80754	0.918161	0.0661143	2.13825	0.18308	2.61648	1.02445	2.00288	0.119464	0.890432	0.104239	0.0355614	2.39833	1251.79	57.8868	57.8868	726.446	12.3372	13.7517	685.328	21.6734	24.6918	702.534	33.3448	38.0261
Mudtank	Mudtank	25.2911	11048.5	18.7583	0.573516	-10.8853	-12.5254	8.77342	0.958515	0.0648589	2.11006	0.18717	2.67701	1.02824	2.0245	0.120483	0.921948	0.116379	0.037562	2.41396	1213.64	60.062	60.062	730.763	12.7446	14.1124	680.567	21.6623	24.619	740.949	35.3576	40.2618
Mudtank	Mudtank	8.88751	11357.7	18.7688	0.583901	-11.2681	-12.4663	8.68664	0.916206	0.0647283	2.19918	0.192999	2.48626	1.04285	2.09608	0.120935	0.897378	0.118134	0.0388008	2.32099	1243.23	62.6082	62.6082	734.158	12.4972	13.9091	685.339	22.1191	24.9469	763.235	34.9247	40.1386
GS16A-ROV06-16-02-3	06_16	124.025	1536.42	606.362	1.17203	-1.53282	-16.1459	1098.04	7.91949	0.0655181	27.5231	0.231425	45.866	0.0071425	15.0184	0.00063734	3.44889	0.00567952	0.000355133	7.56604	2530.33	119.621	119.621	4.10591	0.283219	0.285498	7.12772	2.17787	2.18364	7.17051	1.08558	1.10183
GS16A-ROV06-16-03-3	06_16	45.5495	144.253	49.262	0.513856	-0.229569	-40.9738	-424.705	-8.02985	0.0389113	123.669	-0.0469305	-341.32	0.0102649	83.1639	0.000863075	16.9533	0.124544	-0.000231539	-150.202	3227.59	115.349	115.349	5.51856	1.88261	1.88324	-1.05208	17.5909	17.5924	-5.43989	14.0457	14.0462
GS16A-ROV06-16-04-3	06_16	10.4089	182352	540.854	0.731446	53.456	23.324	11.2698	0.447932	0.110671	1.48922	0.345511	1.22652	1.39694	1.84752	0.0897298	0.456016	0.700169	0.0429403	1.41744	1635.11	49.4468	49.4468	553.569	4.82831	6.69811	849.367	19.6086	22.7846	847.025	23.3705	31.8877
GS16A-ROV06-16-05-3	06_16	0.227989	243287	227.488	0.46893	-151.87	-20.2135	3.56786	0.393833	0.103236	0.412172	0.134773	0.664025	3.98037	0.436341	0.28251	0.396982	0.528107	0.08192	0.613056	1672.3	15.1628	15.1628	1603.71	11.2513	16.7636	1627.4	7.08336	19.1089	1591.13	18.8564	44.6203
GS16A-ROV06-16-06-3	06_16	-84.518	162.343	63.9376	1.13105	-0.0401253	-169.488	-488.235	-8.6665	-0.0321525	-115.477	-0.242105	-56.9859	0.00582852	80.4553	0.000550547	14.7748	-0.0100377	5.9152e-05	174.913	3205.99	114.256	114.256	3.52965	1.04751	1.04797	-1.07576	9.46684	9.46771	1.10189	4.18209	4.18221
GS16A-ROV06-16-13-3	06_16	3.95677	402155	358.9	0.545567	269.819	11.9654	3.99836	0.285548	0.105264	0.299045	0.165284	0.654909	3.61643	0.294147	0.251387	0.288165	0.488734	0.0782852	0.416273	1712.72	11.0592	11.0592	1444.75	7.45405	13.5718	1551.23	4.65883	17.9315	1523.35	12.2748	40.6679
GS16A-ROV06-16-08-3	06_16	0.547277	237070	399.508	0.133071	-66.2091	-39.4421	7.30974	0.974087	0.110642	0.5231	0.112714	0.874849	2.27756	1.30825	0.147519	0.989685	0.931175	0.115415	0.70058	1787.63	19.4187	19.4187	882.818	16.2809	17.8071	1172.12	18.0578	23.5326	2203.38	29.2765	62.2559
GS16A-ROV06-16-09-3	06_16	0.863227	195501	127.287	0.633137	-66.7084	-33.9918	2.75072	0.830389	0.142577	0.469704	0.203186	0.632939	7.3291	0.818186	0.377038	0.713759	0.823844	0.123387	0.561528	2245.82	16.0739	16.0739	2056.38	25.297	29.6887	2134.62	15.8833	26.5081	2349.83	25.0111	63.6732
GS16A-ROV06-16-10-3	06_16	0.402292	288881	185.595	1.21814	-159.093	-20.0571	2.8337	0.40578	0.12394	0.393472	0.34073	0.59056	6.00359	0.403333	0.357004	0.418544	0.224908	0.103842	0.460517	2002.34	13.8927	13.8927	1964.79	14.1212	20.4508	1973.31	7.09051	20.4854	1995.35	17.479	52.8803
GS16A-ROV06-16-11-3	06_16	129.043	104.629	8.26252	0.787888	0.107344	73.9468	-82.8998	-7.26271	-0.12783	-39.2927	-0.382518	-47.4448	0.31486	14.7334	0.00311873	22.0287	0.316242	0.00534985	24.6535	3071.35	161.738	161.738	19.5371	8.84626	8.84801	240.078	65.0373	65.216	95.4309	52.6899	52.7649
GS16A-ROV06-16-14-3	06_16	0.655763	295595	423.962	0.184729	-122.833	-26.4626	5.96779	0.409742	0.080592	0.395794	0.06839	0.760134	1.86013	0.455194	0.169726	0.425706	0.311095	0.0644433	0.736448	1195.52	15.4707	15.4707	1008.51	7.77479	11.161	1063.46	5.95513	15.4931	1261.62	18.086	36.9983
238U/235U	137.818
BeamSecondsMaximum	60
BeamSecondsMethod	Laser log
BeamSecondsSensitivity	1000
DefaultFitType	Exponential
FitEndCrop	1
FitStartCrop	1
IndexChannel	U238
MaskChannel	U238
MaskMethod	Laser log
MaskResults	TRUE
MaskThreshold	1000
MaskTrim	0
ReferenceMaterial	Z_91500
UIsotopeCutoff	2000000
UIsotopeMode	U238
l232	4.95e-11
l235	9.85e-10
l238	1.55e-10

## Sheet: Mount 4
15 March 2021, Department of Earth Sciences, The University of Bergen, Norway								Data for Tera-Wasserburg plot							Data for Wetherill plot									Dates
Identifier	Comments	f206c	206Pb	Uppm	Th/U	206Pb/204Pb	1s%	238U/206Pb	1s%	207Pb/206Pb	1s%	208Pb/206Pb	1s%	207Pb/235U	1s%	206Pb/238U	1s%	Rho	208Pb/232Th	1s%	207Pb/206Pb	2s (abs)	2ssys (abs)	206Pb/238U	2s (abs)	2ssys (abs)	207Pb/235U	2s (abs)	2ssys (abs)	208Pb/232Th	2s (abs)	2ssys (abs)
91500	Z_91500	1.35129	70193.8	79.9896	0.374972	-1096.56	-4.89892	5.56566	0.614976	0.0747407	0.738124	0.110846	1.16846	1.89233	0.722975	0.182476	0.630281	0.412775	0.0550922	1.12997	1035.43	29.9337	29.9337	1078.35	12.5091	26.3024	1073.66	9.86017	19.4425	1081.48	23.7865	39.1995
91500	Z_91500	-0.978895	58260.2	78.4695	0.375662	-761.417	-5.8556	5.85531	0.707884	0.0743794	0.876044	0.110677	1.31909	1.79755	0.848334	0.175159	0.70133	0.416737	0.0526532	1.25982	1033.92	33.1421	33.1421	1039.77	13.582	26.3454	1036.7	11.2509	19.8002	1034.4	25.4206	39.219
91500	Z_91500	2.49248	56843.7	80.0083	0.37659	-894.6	-5.08065	5.6792	0.549279	0.0741611	0.806021	0.111451	1.51231	1.84665	0.761541	0.17906	0.55323	0.233312	0.0537574	1.1897	1017.12	33.0179	33.0179	1060.24	10.8298	25.2603	1054.07	10.1065	19.1835	1055.75	24.4594	39.0424
91500	Z_91500	-1.02107	57122	80.0256	0.373656	-854.25	-5.18786	5.70006	0.530974	0.0747506	0.822549	0.107792	1.21825	1.83842	0.731594	0.177835	0.52437	0.209073	0.05266	1.17486	1029.07	32.2294	32.2294	1054.91	10.3179	25.1528	1053.47	9.82935	19.2126	1034.86	23.7137	38.1432
91500	Z_91500	-0.803148	55418	80.029	0.375205	-894.543	-5.0313	5.71203	0.499075	0.0751737	0.823284	0.108368	1.27671	1.83011	0.758399	0.177379	0.50518	0.191506	0.0527538	1.19579	1040.86	32.6879	32.6879	1051.33	9.79679	24.6393	1049.41	10.0542	19.1416	1039.47	24.5007	38.9874
91500	Z_91500	2.46028	66299.4	80.3864	0.374922	-998.36	-5.35822	5.54149	0.510403	0.075145	0.751641	0.108623	1.1554	1.88987	0.703874	0.182761	0.496369	0.271711	0.0552467	1.13213	1038.05	30.0861	30.0861	1080.71	9.8773	25.2134	1069.99	9.35717	18.8239	1085.81	23.7668	39.1202
91500	Z_91500	0.359567	57469.5	79.916	0.374715	-977.898	-4.99957	5.63416	0.542846	0.0749829	0.851849	0.109262	1.29073	1.86164	0.811086	0.179866	0.531047	0.0835594	0.0541631	1.21628	1038.63	32.373	32.373	1064.76	10.4219	25.1397	1057.67	10.7203	19.4585	1063.38	25.2062	39.7026
91500	Z_91500	0.326028	56892.5	80.0744	0.375323	-950.641	-5.04119	5.73182	0.56436	0.074632	0.807091	0.0608873	123.112	1.82672	0.714334	0.177667	0.541878	0.257659	0.0529489	1.2079	1020.43	30.7623	30.7623	1054.05	10.6668	25.307	1049.18	9.37225	18.6466	1040.24	24.4805	38.7194
91500	Z_91500	0.730479	57309.4	80.0105	0.376482	-871.713	-5.47985	5.65259	0.541471	0.0751188	0.817826	0.109389	1.28446	1.85227	0.761191	0.179601	0.536939	0.244824	0.0538896	1.22631	1041.3	31.8542	31.8542	1063.9	10.582	25.2952	1057.21	10.0821	19.1437	1058.12	25.291	39.6419
91500	Z_91500	0.226319	56364	79.9666	0.373325	-1050.61	-4.71833	5.68846	0.537928	0.075434	0.80396	0.108365	1.29383	1.85295	0.751555	0.178138	0.532358	0.246957	0.0537633	1.25798	1044.5	32.3102	32.3102	1055.33	10.3566	24.9324	1057.25	9.81069	18.8012	1055.56	25.885	39.9705
91500	Z_91500	-0.702238	57202.7	80.0164	0.372476	-942.24	-5.13543	5.69569	0.531877	0.074139	0.769711	0.10833	1.22461	1.82842	0.720335	0.178455	0.538542	0.268635	0.0538652	1.16815	1018.27	30.2721	30.2721	1057.64	10.4348	24.882	1048.51	9.48411	18.7519	1059.3	24.238	39.1239
91500	Z_91500	0.857758	57325.3	79.9786	0.37754	-1051.79	-4.75897	5.63117	0.538809	0.0747276	0.797937	0.108569	1.23723	1.87564	0.770451	0.180862	0.5254	0.291606	0.0539361	1.21113	1035.95	31.9324	31.9324	1070.22	10.3596	25.2132	1065.82	10.2817	19.3535	1059.08	24.985	39.454
91500	Z_91500	0.905407	58001.3	80.0189	0.376741	-899.921	-5.32713	5.63315	0.526257	0.0747928	0.823339	0.107214	1.27917	1.86651	0.745815	0.181019	0.549544	0.532558	0.0530994	1.2103	1037.5	31.8057	31.8057	1070.95	10.7811	25.2838	1060.84	9.93584	19.1477	1043.1	24.6335	38.9149
91500	Z_91500	-0.0342881	56008.6	79.957	0.373764	-958.452	-4.89116	5.74535	0.546723	0.0752399	0.796215	0.110802	1.22841	1.83549	0.744638	0.177038	0.542223	0.242664	0.054053	1.18017	1054.29	30.9356	30.9356	1049.27	10.485	24.862	1052.75	9.77208	18.8542	1062.84	24.541	39.3651
91500	Z_91500	0.189332	56643.3	80.0159	0.371682	-912.517	-4.97254	5.65981	0.513139	0.0738399	0.811763	0.110008	1.30252	1.83063	0.772615	0.178937	0.529149	0.206818	0.0545259	1.25815	1021.38	32.6956	32.6956	1059.71	10.3355	25.0064	1050.44	10.1162	19.0035	1070.11	26.2022	40.4569
91500	Z_91500	-0.313993	56461.1	79.9709	0.377951	-866.748	-5.18013	5.68017	0.533058	0.0753102	0.796289	0.108049	1.23153	1.85964	0.729218	0.179071	0.518742	0.20735	0.0527469	1.17514	1043.78	31.2254	31.2254	1060.49	10.1418	24.9466	1059.43	9.6191	18.8467	1036.51	23.7586	38.2099
91500	Z_91500	0.48965	56592.2	79.9961	0.374214	-854.24	-5.09676	5.66128	0.559123	0.0760729	0.861894	0.110261	1.22317	1.86268	0.75979	0.179594	0.555251	0.11747	0.0545192	1.15563	1066.93	32.6042	32.6042	1063.78	10.8363	25.2005	1059.2	10.094	19.1917	1071.82	24.2353	39.3813
91500	Z_91500	0.497062	56641.1	80.0079	0.374349	-802.685	-5.34384	5.65485	0.498685	0.075473	0.779329	0.109718	1.21551	1.84829	0.701429	0.179298	0.507727	0.210831	0.0537751	1.14954	1054.51	30.9181	30.9181	1061.8	9.93514	24.8817	1057.54	9.29001	18.7378	1059.15	23.9979	39.1241
91500	Z_91500	0.37006	61959.9	79.9659	0.374805	-952.738	-4.95681	5.70607	0.59113	0.0745621	0.767758	0.110431	1.23491	1.83735	0.734056	0.17838	0.574507	0.346432	0.0531902	1.14487	1025.23	30.6981	30.6981	1057.75	11.3228	25.6146	1052.36	9.81033	19.1276	1046.49	23.4385	38.3094
91500	Z_91500	-0.3811	63978.4	80.1062	0.377839	-944.219	-5.06462	5.62775	0.503619	0.074908	0.743881	0.111433	1.17267	1.85695	0.730896	0.179633	0.522065	0.316238	0.05394	1.12847	1041.13	29.4456	29.4456	1065.94	10.2307	25.0318	1061.23	9.69456	18.9622	1059.5	23.2971	38.4254
91500	Z_91500	0.740888	56714.1	79.9762	0.374709	-849.836	-4.83515	5.64941	0.546657	0.0756206	0.87139	0.110106	1.26487	1.86038	0.778236	0.179392	0.551321	0.020082	0.0546705	1.22744	1042.43	33.5483	33.5483	1062.7	10.8659	25.4162	1058.14	10.1752	19.0157	1073	25.6788	40.2277
91500	Z_91500	0.375782	56327.2	80.0087	0.372814	-741.133	-5.35909	5.68931	0.588537	0.0749569	0.810365	0.10747	1.31927	1.84048	0.733521	0.179096	0.595758	0.254517	0.0531802	1.24126	1036.61	32.0399	32.0399	1060.86	11.7019	25.7152	1053	9.7945	19.1071	1045.94	25.4307	39.5768
91500	Z_91500	0.972606	56501.6	79.9895	0.374847	-718.122	-5.23595	5.69881	0.53542	0.0754201	0.866629	0.106508	1.3346	1.83764	0.767712	0.17784	0.533165	0.153696	0.0528365	1.29842	1055.43	33.4526	33.4526	1054.31	10.4466	25.1175	1053.07	10.1181	19.0941	1037.69	26.2812	39.8531
91500	Z_91500	2.01354	57965.3	80.0209	0.375729	-794.829	-5.01636	5.66089	0.538541	0.0755256	0.823468	0.107488	1.24265	1.86153	0.743756	0.179968	0.544423	-0.00198614	0.0536553	1.15298	1048.78	32.8062	32.8062	1065.25	10.6758	25.2304	1060.75	9.89627	19.1102	1053.96	23.6912	38.5522
91500	Z_91500	1.56623	56566.6	79.9824	0.377375	-707.347	-5.0905	5.65709	0.545916	0.0746298	0.802961	0.109775	1.28342	1.85073	0.787124	0.179418	0.527342	0.311339	0.0541129	1.1821	1029.41	31.4609	31.4609	1062.34	10.3415	25.0922	1056.18	10.3585	19.2026	1064.02	24.6207	39.4534
91500	Z_91500	0.798707	58037.1	80.0494	0.372685	-743.129	-4.99316	5.636	0.508543	0.0744246	0.767692	0.108138	1.24363	1.85447	0.740536	0.179789	0.516014	0.244442	0.0545597	1.19189	1025.68	30.584	30.584	1064.42	10.122	25.0078	1058.52	9.7364	18.8614	1071.05	24.8606	39.6383
91500	Z_91500	0.617951	56359.6	79.9826	0.375584	-691.984	-4.91426	5.61505	0.501372	0.0740825	0.804865	0.10677	1.27298	1.8499	0.75137	0.180344	0.506809	0.244013	0.0529398	1.19102	1026.42	30.5395	30.5395	1067.5	9.96256	24.9882	1058.31	10.0105	19.1875	1040.13	24.1487	38.5203
91500	Z_91500	0.967607	56373.2	80.0322	0.373889	-652.257	-5.16075	5.70379	0.496291	0.0745431	0.791492	0.10987	1.27549	1.84248	0.74571	0.177583	0.494421	0.193203	0.0537874	1.20307	1040.3	30.8151	30.8151	1052.5	9.6137	24.6222	1053.68	9.72729	18.7479	1057.68	24.9208	39.5107
91500	Z_91500	0.754349	56493.9	80.0045	0.374532	-634.051	-4.9995	5.68514	0.520242	0.0747766	0.84195	0.109483	1.24641	1.84096	0.752664	0.178648	0.519009	0.15088	0.0536231	1.18373	1029.15	32.8773	32.8773	1058.77	10.1758	25.0196	1052.27	9.95724	19.0615	1054.63	24.4763	39.1891
91500	Z_91500	0.0910109	56686.3	79.9858	0.376622	-646.121	-4.81141	5.64159	0.523325	0.0751039	0.802973	0.111007	1.43494	1.86223	0.739154	0.179745	0.523623	0.224813	0.0538774	1.21236	1048.21	31.4018	31.4018	1064.15	10.2629	25.0482	1062.52	9.71011	18.8362	1057.95	24.9977	39.4498
91500	Z_91500	1.12787	57363.3	80.0066	0.373332	-579.422	-5.09412	5.61013	0.493735	0.0745546	0.784606	0.107687	1.27428	1.86793	0.738753	0.180632	0.487221	0.213514	0.0537522	1.21593	1030.52	31.9777	31.9777	1069.74	9.66052	25.0526	1061.98	9.89239	19.1974	1056.95	25.1537	39.6266
91500	Z_91500	0.640686	56201.5	79.9799	0.375424	-541.626	-5.18905	5.71553	0.536218	0.0745654	0.809008	0.113097	1.29367	1.82987	0.751582	0.177655	0.538438	0.227367	0.0545414	1.18979	1030.26	32.3938	32.3938	1052.66	10.456	24.9366	1049.34	10.0151	19.1925	1070.72	24.8182	39.6131
91500	Z_91500	1.70811	56084.3	79.9952	0.374606	-535.51	-5.05889	5.66168	0.520825	0.0755891	0.804419	0.109122	1.31647	1.8733	0.737113	0.179559	0.513221	0.20982	0.0529507	1.20102	1048.15	31.6882	31.6882	1063.77	10.1175	25.1106	1063.95	9.89458	19.2331	1040.3	24.3852	38.7013
91500	Z_91500	1.34215	56999.3	80.0275	0.376214	-549.23	-4.88598	5.68187	0.511532	0.0744947	0.78715	0.111027	1.22339	1.83297	0.68897	0.178574	0.516601	0.184669	0.0537026	1.16272	1038.19	30.2263	30.2263	1058.38	10.1153	24.9676	1053.92	9.21195	18.8343	1054.83	23.9034	38.6948
91500	Z_91500	-0.000490246	56929.6	79.9983	0.375044	-492.614	-5.0252	5.63847	0.502385	0.073911	0.808708	0.107574	1.22207	1.84044	0.741716	0.179945	0.495311	0.0633833	0.052936	1.16207	1008.75	31.2322	31.2322	1065.96	9.67088	24.731	1052.6	9.65758	18.6866	1041.56	23.7443	38.4506
91500	Z_91500	0.207168	56523.6	79.9916	0.375219	-495.551	-4.96003	5.68081	0.509983	0.0751316	0.846892	0.110708	1.21267	1.85425	0.776664	0.178329	0.503759	0.206143	0.054176	1.15399	1050.97	32.023	32.023	1056.53	9.82359	24.765	1059.85	10.1873	19.0656	1063.89	23.9438	38.9418
91500	Z_91500	0.72388	62877.6	80.001	0.373531	-486.811	-5.19151	5.67319	0.606044	0.075693	0.822316	0.111309	1.22716	1.85416	0.772889	0.1793	0.596365	0.337852	0.054814	1.16501	1053.35	32.446	32.446	1062	11.7458	25.7908	1060.03	10.3135	19.3695	1078.89	24.7166	39.9628
91500	Z_91500	0.763277	63189.9	80.0069	0.373997	-541.62	-4.81561	5.68775	0.598511	0.0757128	0.891973	0.108009	1.2579	1.84822	0.810573	0.179353	0.619551	0.523575	0.0531662	1.19172	1044.68	33.7723	33.7723	1061.44	12.1155	25.8167	1052.95	10.7108	19.4504	1044.46	24.2695	38.6993
91500	Z_91500	0.58046	65514.9	79.9597	0.375162	-481.774	-5.06533	5.71086	0.612417	0.0751495	0.813051	0.111924	1.20558	1.83324	0.777177	0.178663	0.615521	0.310635	0.0537455	1.17812	1041.11	32.1612	32.1612	1058.46	12.086	25.8855	1051.36	10.2266	19.1302	1055.58	24.2317	38.9102
91500	Z_91500	0.751562	67136.2	80.0636	0.377593	-514.318	-5.02721	5.65715	0.61827	0.076339	0.785389	0.112408	1.1589	1.87275	0.738382	0.179811	0.63139	0.350099	0.053523	1.0537	1073.03	30.7705	30.7705	1066.91	12.1931	25.6032	1064.41	9.7477	18.9236	1053.13	21.745	37.4949
91500	Z_91500	0.380716	65057.4	79.929	0.372115	-438.362	-5.06699	5.70142	0.593029	0.0748372	0.793798	0.113724	1.17862	1.83586	0.722182	0.178186	0.601436	0.303131	0.0548475	1.15494	1040.93	31.1391	31.1391	1055.88	11.7837	25.7014	1052.76	9.6435	19.0306	1076.71	24.2191	39.3695
91500	Z_91500	0.374254	66947.1	80.1564	0.376638	-411.099	-5.37734	5.64691	0.585254	0.0743039	0.779443	0.112939	1.15196	1.85348	0.745576	0.1796	0.572922	0.358906	0.0541154	1.09234	1017.13	31.0127	31.0127	1063.08	11.2316	25.465	1058.67	9.81959	18.9282	1064.39	22.7738	38.3527
91500	Z_91500	0.278253	64182	79.9133	0.369944	-421.496	-4.94511	5.63857	0.61654	0.074239	0.786094	0.10852	1.27996	1.85096	0.760565	0.180455	0.609475	0.382759	0.0534433	1.19696	1015.04	30.4389	30.4389	1068.24	12.0554	26.0203	1056.78	10.1134	19.2146	1049.73	24.5233	39.0002
91500	Z_91500	-0.348878	66480.7	80.1502	0.38018	-405.999	-5.17604	5.69743	0.589081	0.0752244	0.806155	0.112326	1.17081	1.85969	0.738518	0.178813	0.582148	0.303016	0.0535459	1.14014	1041.75	32.2764	32.2764	1058.73	11.3591	25.4256	1060.8	9.9296	19.2741	1051.92	23.3831	38.3182
91500	Z_91500	-0.244003	62039	79.8885	0.368351	-371.338	-4.92659	5.74071	0.630426	0.0743238	0.785656	0.110204	1.25038	1.83272	0.753172	0.177855	0.615064	0.350433	0.0540434	1.23376	1026.32	31.195	31.195	1053.3	11.9354	25.5778	1049.83	10.0666	19.2615	1062.52	25.6541	40.0671
91500	Z_91500	1.57119	65238.9	80.1587	0.379798	-349.567	-5.54008	5.67003	0.586636	0.0745884	0.769928	0.109522	1.2141	1.85787	0.702315	0.179754	0.581566	0.317769	0.0525877	1.14745	1021.7	30.9499	30.9499	1063.86	11.3975	25.5323	1059.83	9.30973	18.7596	1033.59	23.1204	37.7363
91500	Z_91500	-0.313415	62375.7	79.8785	0.370488	-337.504	-5.16292	5.70969	0.596909	0.0750793	0.841187	0.109266	1.28681	1.84385	0.774245	0.178642	0.586572	0.252861	0.0535236	1.25122	1028.98	33.8575	33.8575	1058.44	11.5036	25.594	1053.49	10.2263	19.1816	1052.56	25.7853	39.9415
91500	Z_91500	-0.533114	66576	80.2018	0.380121	-347.574	-5.22634	5.65346	0.613475	0.0748193	0.762151	0.112032	1.20979	1.8565	0.743089	0.180045	0.6158	0.415678	0.0539407	1.1224	1029.09	29.8278	29.8278	1067.4	12.2976	26.3294	1057.96	9.82655	18.9882	1059.54	23.1776	38.3593
91500	Z_91500	-0.0837775	62576.8	79.8696	0.370248	-309.296	-5.23373	5.67031	0.560133	0.0750048	0.844938	0.174402	36.7502	1.83675	0.793342	0.178921	0.556081	0.0279108	0.0559852	3.0021	1031.04	31.8063	31.8063	1060.14	10.9235	25.3725	1050.4	10.2864	18.963	1068.66	24.711	27.5511
91500	Z_91500	0.741506	66135.4	80.1493	0.380713	-307.124	-5.55203	5.69101	0.604121	0.076381	0.834544	0.111399	1.23934	1.86958	0.771008	0.179303	0.606455	0.144214	0.0534861	1.20276	1052.42	31.9381	31.9381	1061.25	11.8384	25.6524	1061.56	10.0825	18.9687	1053.4	24.8981	39.4812
91500	Z_91500	0.457733	63470.5	79.9392	0.375486	-274.71	-5.64543	5.65655	0.571833	0.0746616	0.859531	0.107416	1.20523	1.85205	0.792224	0.179698	0.580386	0.22123	0.0526485	1.13323	1039.07	33.5315	33.5315	1063.57	11.3572	25.4834	1057.11	10.5944	19.5502	1037.51	23.1461	38.0749
91500	Z_91500	0.592148	64283	80.0807	0.371353	-302.314	-5.22091	5.74069	0.629281	0.0746823	0.820403	0.111963	1.20133	1.8358	0.779671	0.178315	0.633622	0.0479489	0.0548037	1.18385	1017.17	31.5355	31.5355	1056.9	12.0998	25.3385	1050.19	10.058	18.7719	1077.24	24.9595	39.9604
91500	Z_91500	0.785041	67408.3	79.9692	0.375934	-275.97	-5.7608	5.69311	0.616915	0.0749528	0.776001	0.112981	1.23526	1.8517	0.748937	0.179474	0.608305	0.36704	0.0543912	1.20366	1032.13	31.0598	31.0598	1063.57	12.0347	26.0151	1057.51	9.78364	18.7971	1072.27	25.4769	40.3805
91500	Z_91500	0.532513	68561.3	80.0512	0.376033	-298.352	-5.4554	5.66902	0.608826	0.0749815	0.753984	0.112093	1.22749	1.85705	0.751935	0.17936	0.620171	0.403313	0.0539523	1.17086	1035.59	30.9881	30.9881	1061.47	12.1243	25.8157	1059.06	9.96332	19.0869	1059.56	24.1492	38.9253
91500	Z_91500	1.10624	68414.7	79.9982	0.3744	-265.177	-5.79436	5.6878	0.587152	0.0751527	0.808946	0.113884	1.18174	1.85299	0.761628	0.179055	0.598107	0.326108	0.05471	1.12908	1042.65	31.0605	31.0605	1059.96	11.6785	25.5841	1057.49	10.0859	19.1429	1074.2	23.6163	38.9386
91500	Z_91500	0.718038	68478.1	79.9931	0.375321	-264.945	-5.90227	5.69049	0.610209	0.0747161	0.757732	0.111416	1.23609	1.84452	0.725331	0.178892	0.615747	0.353897	0.0532082	1.17327	1034.72	30.1045	30.1045	1058.95	12.0117	25.719	1055.83	9.4817	18.6512	1045.33	23.9103	38.4913
91500	Z_91500	0.672065	69541.2	80.0141	0.377214	-259.893	-5.90454	5.64583	0.633079	0.0744168	0.78529	0.110455	1.22751	1.86353	0.761671	0.180595	0.624354	0.422872	0.0530859	1.1199	1027.23	30.3999	30.3999	1068.95	12.3417	26.1411	1062.74	10.3694	19.6803	1043.22	22.7616	37.7242
91500	Z_91500	0.809626	68220.9	79.9812	0.372962	-252.514	-5.93627	5.74599	0.619564	0.0746488	0.807433	0.110499	1.23558	1.8334	0.755881	0.177908	0.63307	0.336014	0.0531669	1.20234	1034.16	31.6446	31.6446	1054.18	12.3561	25.892	1052.88	10.109	19.2922	1044.43	24.4503	38.7788
91500	Z_91500	0.219017	70259.6	80.018	0.374315	-272.225	-5.63357	5.74957	0.613551	0.0752575	0.783096	0.113833	1.20285	1.84678	0.777849	0.177887	0.626569	0.776357	0.0545057	1.09924	1040.07	30.7884	30.7884	1053.41	12.1623	25.6903	1053.25	10.2306	19.1259	1070.42	22.9197	38.4417
91500	Z_91500	0.397122	70488.6	79.9728	0.375154	-238.039	-6.26629	5.62169	0.572245	0.074107	0.743194	0.111386	1.17516	1.85895	0.724414	0.180791	0.566524	0.372232	0.0545184	1.17006	1028.2	29.5115	29.5115	1069.6	11.1564	25.5242	1060.2	9.84534	19.3845	1070.36	24.3799	39.3135
91500	Z_91500	1.21145	69362.8	79.9772	0.373386	-247.037	-6.50271	5.70917	0.605627	0.0754652	0.75381	0.11008	1.20835	1.85642	0.731	0.179196	0.644958	0.506428	0.0528535	1.14702	1054.42	29.633	29.633	1060.44	12.5191	25.8608	1060.14	9.59107	18.7578	1038.66	23.242	37.9436
91500	Z_91500	-0.460221	69638.3	80.0406	0.376997	-262.894	-5.57005	5.7329	0.630488	0.0748672	0.785126	0.112902	1.22783	1.83689	0.765319	0.178128	0.614269	0.400029	0.0534212	1.1349	1037.64	30.7802	30.7802	1054.8	11.932	25.5962	1052.29	10.2031	19.2979	1050.96	23.3529	38.3796
91500	Z_91500	0.52911	68362.7	79.9442	0.373489	-266.057	-5.47572	5.7206	0.608047	0.0745108	0.810626	0.112072	1.21448	1.83517	0.772659	0.178112	0.62072	0.308783	0.053591	1.16569	1031.54	32.181	32.181	1055.4	12.1277	25.8052	1050.9	10.2735	19.2983	1054.12	24.044	38.8617
91500	Z_91500	0.425508	70582.1	80.0884	0.376181	-253.258	-5.7208	5.64317	0.600114	0.0748108	0.761804	0.110915	1.19655	1.86586	0.725744	0.180736	0.599337	0.364424	0.0533962	1.17741	1039.82	30.3077	30.3077	1069.79	11.8625	25.9453	1063.77	9.64432	18.9631	1048.91	24.0538	38.639
91500	Z_91500	-0.188628	68728.9	79.9764	0.373551	-242.959	-5.79484	5.69008	0.615983	0.0745929	0.751611	0.113958	1.26059	1.84444	0.727366	0.178652	0.606029	0.393143	0.0541726	1.177	1025.65	30.5394	30.5394	1057.71	11.8179	25.622	1056.3	9.62993	18.9036	1065.15	24.5221	39.3997
91500	Z_91500	0.0423216	70115	80.0459	0.376184	-239.646	-5.8598	5.65717	0.567339	0.0749965	0.789101	0.112707	1.08859	1.85475	0.746429	0.179523	0.566714	0.316311	0.0539964	1.07793	1041.13	30.4585	30.4585	1064.03	11.1107	25.4135	1057.82	9.95128	19.1662	1060.78	22.2776	37.8424
GJ-1	Z_GJ1	0.828838	187687	484.341	0.018607	-2920.75	-4.96491	9.67999	0.561796	0.0600879	0.597871	0.00584119	3.07582	0.87746	0.64373	0.104853	0.565286	0.442571	0.0329245	2.9912	622.791	23.6514	23.6514	642.139	6.90861	15.8338	637.178	6.02898	12.9903	653.004	38.7846	43.2733
GJ-1	Z_GJ1	0.359273	169829	516.986	0.0182999	-2684.28	-4.81304	10.1193	0.624767	0.0606008	0.686098	0.00611669	5.05632	0.847721	0.672058	0.100386	0.615866	0.0878976	0.0318043	3.38229	640.103	25.6053	25.6053	616.441	7.28729	15.6	620.125	6.11481	12.7411	625.212	41.7878	45.614
GJ-1	Z_GJ1	0.394646	151688	382.151	0.0180236	-2291.82	-5.15274	10.1136	0.571641	0.0595047	0.676043	0.00579229	3.52032	0.828636	0.716327	0.100156	0.598635	0.10853	0.0322691	3.46995	604.304	24.5806	24.5806	614.656	7.00228	15.3294	609.192	6.47805	12.8623	636.291	43.7631	47.5782
GJ-1	Z_GJ1	0.922892	175101	432.969	0.0180405	-2826.04	-4.98956	9.88395	0.683425	0.0602422	0.668147	-0.00496063	-211.779	0.862381	0.628769	0.103476	0.600897	0.413042	0.0317182	3.38907	616.9	23.6026	23.6026	634.03	7.25772	15.8412	629.808	5.816	12.767	626.095	42.0807	45.9189
GJ-1	Z_GJ1	0.351975	159326	322.202	0.0179278	-2633.66	-4.98663	10.2638	0.589169	0.0599704	0.737697	0.0123327	51.7235	0.815669	0.718685	0.0990199	0.592246	0.0251392	0.0339857	3.77231	628.991	26.085	26.085	608.021	6.86747	15.1624	601.315	6.26274	12.4038	664.867	49.2806	52.9383
GJ-1	Z_GJ1	0.141144	158255	300.105	0.0181483	-2358.05	-5.3632	10.4383	0.606399	0.0613611	0.680488	0.00563128	3.96352	0.825446	0.689873	0.0977516	0.611939	0.114431	0.0303299	3.70183	657.341	25.2772	25.2772	600.551	7.00118	15.0636	608.489	6.11818	12.4964	595.603	43.6836	47.0461
GJ-1	Z_GJ1	-0.0169778	153671	386.12	0.0181227	-2466.35	-5.17325	10.3008	0.560994	0.060594	0.618147	0.00581361	3.58943	0.823683	0.611158	0.0983389	0.548155	0.444636	0.0316529	3.51327	645.527	24.077	24.077	604.122	6.32328	14.8601	607.717	5.56297	12.4906	621.685	43.3027	46.9888
GJ-1	Z_GJ1	-0.126641	154415	380.491	0.0182057	-2606.25	-4.96535	10.1949	0.564846	0.060084	0.655703	0.00562718	3.59167	0.82688	0.674769	0.0994643	0.559175	0.0749309	0.0308198	3.60933	635	24.9272	24.9272	610.691	6.51644	15.0671	608.595	6.15817	12.7924	605.359	43.314	46.8146
GJ-1	Z_GJ1	0.417723	156261	404.181	0.0183785	-2574.46	-5.10466	10.2019	0.552649	0.0602314	0.653716	0.00570449	3.58534	0.823127	0.638954	0.0993621	0.556437	0.0238031	0.0315696	3.60085	623.641	24.5312	24.5312	610.099	6.47714	15.0368	606.855	5.82602	12.6272	619.713	44.2025	47.7912
GJ-1	Z_GJ1	0.136329	152810	396.114	0.0181713	-2405.31	-5.31686	10.2605	0.600538	0.0606709	0.656437	0.00695499	21.9426	0.827334	0.65143	0.0988277	0.584782	0.457973	0.0306988	3.80534	649.959	25.2071	25.2071	607.78	6.86806	15.3179	609.057	5.9575	12.7179	602.144	45.4449	48.7616
GJ-1	Z_GJ1	0.263516	154635	390.923	0.0181039	-2582.3	-5.25957	10.2178	0.585796	0.0601732	0.643242	0.0148783	63.3249	0.83026	0.68155	0.0994757	0.58819	0.121936	0.0311641	3.83231	626.911	24.6306	24.6306	610.697	6.85354	15.2146	610.42	6.19507	12.7711	610.921	46.2938	49.6267
GJ-1	Z_GJ1	0.243697	155984	393.066	0.0183869	-2923.56	-4.63948	10.1583	0.572507	0.0593255	0.683959	0.0117327	51.6725	0.821204	0.662656	0.10008	0.591761	0.0673566	0.0322161	3.91629	610.355	24.4676	24.4676	614.227	6.91782	15.2834	605.077	5.88559	12.3985	630.494	48.7589	52.1251
GJ-1	Z_GJ1	0.129771	153623	390.028	0.018272	-2266.1	-5.49422	10.0053	0.576853	0.0594848	0.672598	0.00559366	3.63158	0.832889	0.648024	0.101036	0.565161	0.426438	0.0313663	3.53921	627.649	25.4583	25.4583	619.87	6.67729	15.3064	613.154	6.008	12.8782	616.118	43.1849	46.8093
GJ-1	Z_GJ1	0.228835	151283	389.203	0.0179466	-2311.86	-5.3475	10.1324	0.582387	0.0599404	0.648659	0.00560808	3.80447	0.828781	0.661965	0.100211	0.594075	0.463256	0.030942	3.74458	637.57	24.3454	24.3454	614.982	6.96684	15.3439	610.497	6.09174	12.843	609.71	45.3915	48.8089
GJ-1	Z_GJ1	-0.00227863	152716	392.507	0.0180614	-2409.28	-5.09041	10.212	0.605533	0.06039	0.66902	0.00547108	3.81927	0.829928	0.640262	0.0995016	0.613776	0.433454	0.0303729	3.81239	647.395	24.8604	24.8604	611.249	7.19059	15.4349	611.596	5.97898	12.9381	595.889	45.1151	48.3961
GJ-1	Z_GJ1	0.464041	150616	389.925	0.0181593	-2444.61	-4.99973	10.241	0.586881	0.0600436	0.700242	0.00548612	3.79045	0.821223	0.691283	0.0988888	0.601125	0.248747	0.0300349	3.71403	645.509	25.8743	25.8743	607.688	6.91102	15.0798	604.832	6.20557	12.6556	589.897	43.5031	46.8306
GJ-1	Z_GJ1	0.117085	155315	392.654	0.018058	-2503.95	-6.66692	10.2619	0.612237	0.0596707	0.661572	0.00528394	3.86171	0.808318	0.656596	0.099825	0.694523	0.381265	0.0295084	3.84902	624.772	25.3394	25.3394	610.485	7.53875	14.7296	601.063	6.04262	12.8205	579.248	44.2816	47.4429
GJ-1	Z_GJ1	-0.0895677	152441	384.716	0.0180094	-2176.38	-5.2886	10.1078	0.596482	0.0609567	0.709898	0.0111117	50.6126	0.839547	0.78003	0.100191	0.60852	0.256096	0.0313722	3.97586	662.259	26.5656	26.5656	615.281	7.19108	15.5404	613.872	6.91812	12.9074	614.15	48.3569	51.5992
GJ-1	Z_GJ1	0.402468	153942	340.298	0.0175305	-2325.53	-4.97017	10.3318	0.570879	0.0596826	0.677966	0.00552432	3.70168	0.809523	0.660344	0.097688	0.566499	0.389603	0.0304154	3.65303	626.198	26.0257	26.0257	601.087	6.49731	14.8657	600.117	6.02375	12.7241	600.053	43.5675	47.008
GJ-1	Z_GJ1	0.0391956	149983	322.826	0.0179271	-2100.7	-5.19803	10.2544	0.58769	0.0606352	0.657564	0.00605064	3.68173	0.827382	0.6844	0.0986643	0.599753	0.319589	0.0329485	3.63893	630.552	24.5692	24.5692	605.922	6.93396	15.1571	608.334	6.18505	12.7098	648.603	46.809	50.5331
GJ-1	Z_GJ1	0.2263	140329	346.931	0.0186573	-1996.41	-5.05493	9.99322	0.726319	0.0606239	0.80084	0.0056701	4.14146	0.856904	0.758128	0.103424	0.805863	0.0163971	0.0305837	4.01701	664.056	27.4345	27.4345	633.172	9.62745	16.9311	624.134	7.03724	13.4013	602.034	48.0833	51.2436
GJ-1	Z_GJ1	0.336399	135492	345.199	0.0185892	-1994.96	-4.96377	10.1338	0.703253	0.0608291	0.812886	0.00559612	3.91847	0.840559	0.788591	0.100292	0.721922	0.191001	0.0305596	3.88156	663.638	27.6744	27.6744	615.142	8.45476	16.059	614.368	7.15912	13.2541	604.501	46.8232	50.112
GJ-1	Z_GJ1	0.457138	139883	339.764	0.0185498	-1884.33	-5.11297	10.108	0.676979	0.0600095	0.725844	0.00573193	4.04003	0.828121	0.724958	0.100884	0.684225	0.45423	0.0312684	4.00116	650.543	27.2732	27.2732	618.698	8.07057	15.9444	610.329	6.73599	13.2554	617.849	49.2626	52.5253
GJ-1	Z_GJ1	0.598807	142430	346.495	0.0183414	-1969.43	-5.01313	10.0897	0.703163	0.059973	0.698138	0.00655113	11.3578	0.83086	0.739917	0.101525	0.756118	0.469742	0.0334473	3.95231	650.615	25.92	25.92	622.253	8.92246	16.3974	610.885	6.91787	13.4097	653.547	51.203	54.6759
GJ-1	Z_GJ1	0.666538	139729	337.417	0.0183898	-1793.46	-5.01156	10.2314	0.865265	0.0607736	0.733425	0.00913452	33.2037	0.847829	0.735512	0.100999	0.697407	0.485955	0.0322204	3.99629	658.626	27.1145	27.1145	619.893	8.2883	16.1446	620.165	6.94633	13.5235	630.105	49.8472	53.1564
GJ-1	Z_GJ1	0.0612445	133196	315.253	0.0181638	-1516.73	-7.22916	10.1103	0.73596	0.0608078	0.756769	0.00655351	8.255	0.852673	0.854342	0.101934	0.811157	0.440493	0.0339537	4.12464	662.889	27.6329	27.6329	623.476	9.37532	16.4147	620.075	7.51349	13.1603	657.328	53.3642	56.6962
GJ-1	Z_GJ1	0.194335	138918	346.131	0.0183452	-1716.17	-4.97478	10.1971	0.703598	0.0608279	0.778029	0.00581419	4.10754	0.846407	0.829323	0.100082	0.699224	0.102016	0.0311518	3.89106	653.101	27.3482	27.3482	614.54	8.11905	15.7845	616.96	7.31701	13.0784	610.36	47.1209	50.415
GJ-1	Z_GJ1	0.351405	137276	332.399	0.0183618	-1689.07	-4.85448	10.0518	0.750729	0.0595342	0.836228	0.00930481	21.8259	0.842494	0.892693	0.10144	0.739517	0.0787602	0.0371442	5.97685	648.103	27.9916	27.9916	621.801	8.74056	16.3169	614.149	7.65747	13.0273	679.03	52.9711	54.5713
GJ-1	Z_GJ1	0.162058	142753	354.681	0.0184272	-1502.37	-5.2485	9.93161	0.664133	0.0598724	0.71519	0.00559647	3.9097	0.844091	0.714733	0.102539	0.67831	0.422911	0.0310726	3.94863	631.774	26.9885	26.9885	628.376	8.11732	16.1407	619.235	6.60708	13.1398	608.556	47.7428	50.9868
GJ-1	Z_GJ1	0.855066	132356	338.488	0.0183643	-1466.03	-5.06742	10.1876	0.701017	0.0610403	0.845528	0.00591437	5.58507	0.84544	1.01093	0.0998387	0.696054	0.0140383	0.0313434	4.11652	654.892	27.7335	27.7335	613.098	8.07173	15.7454	614.364	7.73749	12.178	609.026	49.4735	52.5744
GJ-1	Z_GJ1	0.522503	146474	369.161	0.0184546	-1425.49	-5.29312	10.1267	0.62168	0.0600065	0.693383	0.00588438	3.66598	0.836893	0.717583	0.100954	0.652597	0.450667	0.0322655	3.56473	639.619	26.178	26.178	619.194	7.68559	15.7341	614.016	6.67107	13.2276	638.579	45.2304	48.9745
GJ-1	Z_GJ1	0.223423	145617	373.747	0.0179532	-1395.96	-5.30877	10.0752	0.636234	0.060357	0.732397	0.00589017	3.63884	0.838552	0.719482	0.100422	0.625957	0.433978	0.0322887	3.55134	661.537	26.8126	26.8126	616.147	7.3504	15.538	616.979	6.62285	13.1061	639.21	45.2544	49.0277
GJ-1	Z_GJ1	0.234274	144677	348.154	0.018161	-1447.26	-4.81694	9.95355	0.637659	0.0600551	0.722173	0.00589253	5.05493	0.847441	0.730741	0.101948	0.647059	0.375817	0.0318295	3.83381	628.952	26.6557	26.6557	625.491	7.74936	15.9685	619.725	6.70367	13.1141	616.634	46.3695	49.7053
GJ-1	Z_GJ1	0.284676	142537	341.527	0.0176964	-1333.13	-5.09072	10.078	0.688522	0.0606537	0.707149	0.00573283	3.82566	0.844806	0.723598	0.101094	0.715891	0.418787	0.0323604	3.91584	669.195	26.5881	26.5881	620.407	8.37757	16.0096	619.852	6.87717	13.5518	636.093	49.5778	53.0014
GJ-1	Z_GJ1	0.455454	147038	371.654	0.0180292	-1254.03	-5.09662	10.1915	0.600573	0.0602937	0.679831	0.00536614	3.7968	0.835283	0.733932	0.0992739	0.605417	0.293746	0.0302715	3.84192	631.439	25.8086	25.8086	609.48	7.0364	15.2677	612.197	6.46008	12.5977	593.858	45.3169	48.5637
GJ-1	Z_GJ1	0.190651	142478	357.628	0.018157	-1159.75	-5.34094	10.2717	0.737064	0.0664673	7.3702	0.0052814	8.66487	0.844783	0.775181	0.100116	0.716173	0.0247449	0.0306591	3.94235	668.412	27.2845	27.2845	615.015	8.18866	15.6442	617.392	7.10746	13.3205	609.853	48.0829	51.3601
GJ-1	Z_GJ1	0.409323	145079	329.523	0.0180198	-1078.43	-5.35826	10.2774	0.722199	0.0655646	6.17869	0.00652159	28.4869	0.830356	0.68297	0.0996782	0.615696	0.0446194	0.0343883	4.04216	646.894	23.991	23.991	611.821	7.17673	15.3678	610.432	6.23685	12.8374	662.892	50.3991	53.6717
GJ-1	Z_GJ1	0.340426	146450	330.464	0.0181065	-1115.84	-5.20535	10.2498	0.661816	0.0606518	0.73925	0.0114291	29.7501	0.828215	0.762517	0.100179	0.72101	0.773778	0.0316661	4.56636	641.446	26.8302	26.8302	613.782	8.29501	15.7704	607.866	6.71366	12.7325	605.155	47.3132	49.7367
GJ-1	Z_GJ1	0.135969	145735	311.927	0.0178387	-1021.06	-5.22864	10.2364	0.616206	0.0610944	0.763497	0.00561562	3.87494	0.829189	0.739685	0.0994072	0.628732	0.216324	0.0302726	3.8406	657.128	27.5478	27.5478	610.209	7.29498	15.3682	609.208	6.75671	13.0999	593.875	45.2491	48.4933
GJ-1	Z_GJ1	0.54426	147569	310.254	0.0176236	-1073.54	-7.98152	10.2007	0.650438	0.0594468	0.714218	0.0113135	48.7262	0.818079	0.735182	0.100729	0.708896	0.600465	0.0326611	3.9005	621.818	26.1372	26.1372	617.738	8.29798	15.9711	603.138	6.64453	12.9403	638.987	49.2461	52.6727
GJ-1	Z_GJ1	0.00405369	147352	315.673	0.017629	-931.044	-5.37357	10.3968	0.656397	0.0593528	0.700149	0.00596179	3.6983	0.809063	0.719205	0.0978268	0.657631	0.443723	0.0323029	3.7622	640.46	26.7458	26.7458	600.887	7.53443	15.3351	599.318	6.6327	13.1294	638.61	47.7556	51.3186
GJ-1	Z_GJ1	0.643039	146806	309.855	0.0176714	-987.017	-5.11723	10.193	0.67426	0.060791	0.724709	0.0140772	41.5804	0.843243	0.703145	0.100413	0.696314	0.0610899	0.0334542	3.83852	660.356	26.5232	26.5232	615.92	8.14805	15.89	617.314	6.44873	12.983	654.354	49.5879	53.1468
GJ-1	Z_GJ1	0.28641	155079	335.622	0.0179231	-838.735	-5.56632	10.5132	0.538959	0.0605748	0.634687	0.00565782	3.78621	0.81317	0.631924	0.0966946	0.536277	0.3974	0.0295353	3.70966	643.154	25.1081	25.1081	594.503	6.09086	14.5743	601.401	5.70291	12.4686	580.35	42.7476	46.0247
GJ-1	Z_GJ1	0.14749	158776	333.311	0.0180673	-928.434	-5.32578	10.3459	0.502083	0.0602494	0.614163	0.00582766	3.52246	0.815523	0.59642	0.0977238	0.524897	0.419145	0.0322345	3.55838	631.329	23.9638	23.9638	600.563	6.01569	14.6524	603.334	5.44162	12.4607	632.58	44.5764	48.2789
GJ-1	Z_GJ1	-0.780502	156794	339.241	0.0181944	-836.097	-5.41974	10.2072	0.521461	0.0596429	0.645383	0.0056385	4.08569	0.823038	0.641539	0.0993755	0.547537	0.214129	0.0299607	3.79373	600.924	23.7513	23.7513	610.197	6.35743	14.9543	606.276	5.68555	12.2837	588.153	44.2193	47.4657
GJ-1	Z_GJ1	0.187116	156534	337.747	0.0179169	-891.261	-5.07271	10.2719	0.528467	0.0595914	0.63955	0.00510795	3.87006	0.817354	0.635343	0.0987147	0.53427	0.416687	0.0286237	3.90313	606.369	24.5053	24.5053	606.352	6.17824	14.8293	604.311	5.84521	12.7255	564.744	43.7834	46.8259
GJ-1	Z_GJ1	0.0460018	156227	328.057	0.0181481	-812.879	-5.21202	10.1886	0.527576	0.0603372	0.633343	0.00592191	4.24916	0.826652	0.609837	0.099405	0.512984	0.205986	0.0313669	3.76495	628.437	24.3254	24.3254	610.435	5.97299	14.8301	609.041	5.59945	12.5946	615.075	45.7855	49.1967
GJ-1	Z_GJ1	0.259323	160288	327.852	0.0183395	-748.169	-5.90567	10.2043	0.524643	0.0595345	0.583517	0.00568093	3.64731	0.811617	0.621881	0.0993915	0.573012	0.426702	0.0304645	3.58241	601.557	22.8082	22.8082	609.329	6.54395	14.8351	602.324	5.5564	12.3042	601.234	42.7521	46.2575
GJ-1	Z_GJ1	0.258304	150574	320.163	0.0180811	-705.82	-5.54901	10.2276	0.576313	0.0605964	0.657765	0.00583869	3.50757	0.823822	0.655198	0.0986874	0.565334	0.425233	0.0318684	3.47459	647.584	25.9687	25.9687	606.13	6.53235	14.9712	607.416	6.03182	12.8188	628.665	43.3443	47.1133
GJ-1	Z_GJ1	0.22409	149014	310.024	0.0181083	-802.047	-4.9456	10.2634	0.571858	0.060229	0.667051	0.00559126	3.91762	0.815293	0.67191	0.0985615	0.577592	0.446309	0.0298517	3.76691	634.788	25.6766	25.6766	605.367	6.67021	15.025	604.043	6.05518	12.62	588.863	44.1014	47.3839
GJ-1	Z_GJ1	0.0248809	153674	343.128	0.0186341	-720.973	-5.18624	10.3545	0.556471	0.0601836	0.655547	0.0053074	3.84718	0.817662	0.644189	0.0980715	0.569367	0.0765007	0.0280262	3.85228	623.463	24.668	24.668	602.516	6.54574	14.9159	603.794	5.84485	12.5872	553.53	42.3673	45.387
GJ-1	Z_GJ1	0.400644	148415	329.358	0.0181786	-653.568	-5.63956	10.3892	0.574737	0.0604607	0.706683	0.00549961	3.82633	0.817385	0.674709	0.0975427	0.571538	0.214634	0.0287469	3.74502	645.649	25.9671	25.9671	599.828	6.58322	14.9552	602.908	6.04883	12.5668	567.85	42.3214	45.5069
GJ-1	Z_GJ1	0.546776	155250	323.273	0.0181432	-629.642	-5.75166	10.2779	0.563246	0.0600271	0.658557	0.00564921	3.88072	0.815242	0.658418	0.0985761	0.564672	0.428655	0.0300998	3.83142	640.793	24.698	24.698	605.481	6.51636	14.9488	604.049	6.05636	12.8223	593.305	45.1435	48.395
GJ-1	Z_GJ1	0.164508	153484	317.164	0.0178117	-652.318	-5.50242	10.3971	0.547736	0.0600801	0.697517	0.00695798	20.486	0.810571	0.676949	0.0975443	0.563112	0.182672	0.0313538	3.71211	637.177	26.1215	26.1215	599.437	6.43556	14.7966	599.548	6.09243	12.6252	615.138	44.9686	48.4115
GJ-1	Z_GJ1	0.142087	155612	332.378	0.017571	-640.586	-6.34438	10.3748	0.60599	0.0606901	0.664007	0.00528309	3.84632	0.820654	0.648832	0.0983499	0.650913	0.257967	0.0290465	3.91369	655.776	25.5949	25.5949	603.967	7.4781	15.3397	606.086	5.89307	12.6196	570.165	44.2547	47.3139
GJ-1	Z_GJ1	0.168979	154737	329.51	0.0179982	-630.591	-5.589	10.3475	0.603561	0.0599255	0.621694	0.005504	3.76685	0.819493	0.664982	0.0983709	0.606942	0.482695	0.0295664	3.69255	621.347	24.9346	24.9346	604.643	6.94401	15.0373	604.921	6.08763	12.7893	583.618	42.8594	46.1745
GJ-1	Z_GJ1	0.369344	158131	336.073	0.0179056	-675.509	-5.31041	10.3697	0.542558	0.0593558	0.63208	0.00572867	10.0952	0.809531	0.638913	0.097535	0.541958	0.292492	0.0295843	4.02776	600.113	24.0964	24.0964	599.829	6.24527	14.8146	598.879	5.67157	12.2931	576.196	45.5974	48.5788
GJ-1	Z_GJ1	0.173791	154353	326.612	0.0177718	-620.512	-5.44317	10.3579	0.565268	0.059673	0.614592	0.00601038	3.48452	0.81215	0.635925	0.097954	0.557219	0.469052	0.0336313	3.47883	607.742	23.9986	23.9986	601.851	6.39863	14.8375	601.826	5.77993	12.5743	662.344	45.6681	49.6298
GJ-1	Z_GJ1	0.158454	160136	333.002	0.0179517	-587.791	-5.85071	10.2458	0.568891	0.059597	0.611219	0.00570794	3.41398	0.818306	0.654282	0.0989162	0.574923	0.444248	0.0314356	3.47779	615.405	22.9508	22.9508	607.452	6.65627	15.0486	604.05	5.94388	12.6456	625.08	43.294	47.0519
GJ-1	Z_GJ1	-0.0770243	158547	326.215	0.0178746	-597.49	-5.71692	10.1927	0.652604	0.0592987	0.688729	0.000828429	483.601	0.821129	0.676937	0.100173	0.598874	0.415719	0.0328847	3.55509	599.651	25.1328	25.1328	614.754	7.01534	15.3524	605.795	6.11527	12.6723	644.969	45.4576	49.2401
GJ-1	Z_GJ1	0.302356	158464	326.102	0.0181506	-594.001	-5.70742	10.2088	0.532705	0.0597899	0.592346	0.00565449	3.41121	0.824345	0.610255	0.099058	0.522669	0.477933	0.0308508	3.4564	616.452	23.4213	23.4213	608.385	6.06841	14.8334	609.106	5.58913	12.5644	606.627	41.5312	45.1791
GJ-1	Z_GJ1	-0.00583092	159616	331.444	0.017968	-571.885	-5.79512	10.3267	0.524166	0.0594464	0.586576	0.00558399	3.68366	0.808197	0.569375	0.0981834	0.51268	0.417282	0.0306139	3.65438	598.479	22.9863	22.9863	603.638	5.94141	14.759	600.061	5.13156	12.2046	601.216	43.6038	47.0447
GJ-1	Z_GJ1	0.283894	157413	318.39	0.0183031	-619.284	-5.80808	10.2596	0.494776	0.060009	0.631709	0.00585674	3.53278	0.819835	0.608502	0.0987932	0.52819	0.136004	0.0308871	3.52086	620.537	23.9206	23.9206	606.824	6.10556	14.7951	605.303	5.53236	12.4657	612.073	42.864	46.4977
GJ-1	Z_GJ1	0.299617	159469	322.456	0.0181711	-539.644	-5.99627	10.3874	0.47968	0.059808	0.619754	0.00544142	3.63226	0.809428	0.589664	0.0973579	0.468918	0.21398	0.0291421	3.73342	608.174	23.8275	23.8275	598.516	5.35563	14.3517	599.682	5.31946	12.2944	572.762	42.4477	45.6619
GJ-1	Z_GJ1	0.17763	162246	335.68	0.0178654	-549.987	-5.91893	10.4891	0.514129	0.0598996	0.609086	0.00558709	3.40501	0.79901	0.626333	0.0965445	0.506355	0.47386	0.029806	3.41576	617.188	23.9623	23.9623	593.677	5.74334	14.4166	595.129	5.71663	12.5872	586.754	39.77	43.3433
GJ-1	Z_GJ1	0.267433	160040	324.716	0.0179572	-629.029	-5.22828	10.4096	0.532195	0.0591967	0.641121	0.00541775	3.70152	0.797308	0.605668	0.0972569	0.519852	0.34077	0.0293955	3.72987	596.169	24.5036	24.5036	597.834	5.93238	14.5666	592.765	5.4196	12.2575	577.622	42.7562	45.9998
Plesovice	Z_Plesovice	0.116163	194721	1208.77	0.107658	-2920.2	-5.03042	18.2107	0.415717	0.0529716	0.545085	0.0318087	1.14672	0.410476	0.554156	0.0553933	0.412107	0.420377	0.0168911	1.12037	404.828	20.6556	20.6556	347.444	2.78612	8.35944	348.3	3.26186	7.93368	338.311	7.51909	12.4586
Plesovice	Z_Plesovice	0.675888	193639	1298.2	0.109771	-2725.16	-5.26193	18.1137	0.422875	0.0532562	0.566654	0.0330305	1.20202	0.414985	0.554965	0.0557097	0.425264	0.362924	0.0172286	1.14938	425.446	21.47	21.47	349.367	2.89168	8.43788	351.706	3.30801	8.03612	344.994	7.8612	12.8173
Plesovice	Z_Plesovice	0.507304	194451	937.103	0.106059	-3272.59	-4.74815	18.344	0.425166	0.0533633	0.547289	0.0323246	1.22692	0.409777	0.538252	0.0550799	0.431071	0.380978	0.0173166	1.19954	417.114	19.9282	19.9282	345.696	2.9166	8.40947	347.849	3.16107	7.87739	346.716	8.24768	13.0996
Plesovice	Z_Plesovice	-0.351396	177101	896.724	0.107313	-2560.88	-5.2587	18.6022	0.42391	0.0528726	0.550116	0.0327252	1.30048	0.399726	0.576438	0.0543791	0.420161	0.0782843	0.0170317	1.2104	400.428	20.1752	20.1752	341.245	2.7915	8.23306	340.486	3.33878	7.86071	341.059	8.18522	12.9301
Plesovice	Z_Plesovice	0.141314	185134	601.412	0.105182	-3078.51	-4.93319	18.6185	0.403581	0.0528111	0.531384	0.0315251	1.27923	0.395407	0.523517	0.0542046	0.407042	0.359852	0.0170644	1.2694	405.436	19.7257	19.7257	340.339	2.71274	8.22939	337.527	3.01262	7.68537	341.678	8.60212	13.2136
Plesovice	Z_Plesovice	-0.0109697	187055	583.829	0.105912	-3136.49	-4.9157	18.5061	0.407956	0.0529017	0.587048	0.0319956	1.28296	0.397979	0.561643	0.0545581	0.400259	0.0120132	0.0171648	1.21287	392.787	19.8677	19.8677	342.348	2.6678	8.2155	339.277	3.23103	7.77174	343.699	8.27068	13.0492
Plesovice	Z_Plesovice	0.560839	180451	798.467	0.105952	-3334.95	-4.67336	18.2839	0.407928	0.0530923	0.540843	0.0311937	1.15359	0.407656	0.572061	0.0553379	0.411613	0.828374	0.0168747	1.11456	399.273	20.9168	20.9168	347.105	2.77961	8.34892	345.721	3.10494	7.35627	337.987	7.47551	12.4274
Plesovice	Z_Plesovice	0.206316	191731	902.987	0.105057	-3469.34	-6.72555	18.5248	0.589076	0.0532085	0.798228	0.0316631	1.66772	0.399601	0.751008	0.0543521	0.596615	0.291592	0.0170411	1.63589	420.31	28.4043	28.4043	341.414	3.91366	8.59066	340.564	4.32403	8.29108	341.276	11.0692	14.9277
Plesovice	Z_Plesovice	0.355917	171291	796.012	0.10485	-2800.27	-5.22115	18.1642	0.419994	0.053542	0.568819	0.0311471	1.34946	0.409334	0.526415	0.0556675	0.427244	0.322305	0.0172022	1.30284	431.704	21.1251	21.1251	349.109	2.90272	8.43564	347.933	3.1307	7.94946	344.394	8.8999	13.4701
Plesovice	Z_Plesovice	0.192771	175908	829.328	0.105391	-2905.32	-5.09799	18.4359	0.399829	0.0521405	0.570227	0.0321186	1.27515	0.394387	0.547724	0.0547973	0.39821	0.316022	0.0174431	1.25499	390.985	20.9912	20.9912	343.81	2.66575	8.24691	336.711	3.15363	7.74531	349.196	8.69237	13.4409
Plesovice	Z_Plesovice	-0.207686	171945	787.697	0.104716	-2859.41	-5.05674	18.3077	0.407217	0.0529551	0.552364	0.0306213	1.40454	0.405048	0.550883	0.0549793	0.410791	0.414386	0.0169536	1.35444	411.693	20.4926	20.4926	344.916	2.75931	8.30266	344.593	3.23361	7.90373	339.435	9.12232	13.5128
Plesovice	Z_Plesovice	0.673371	176916	811.677	0.105354	-3056.16	-4.93243	18.2519	0.427412	0.0527739	0.565584	0.0317073	1.28772	0.404945	0.577206	0.0553985	0.43483	0.430351	0.0174359	1.24133	409.392	20.657	20.657	347.463	2.94015	8.41309	344.442	3.39559	7.98582	349.061	8.59393	13.3739
Plesovice	Z_Plesovice	0.061593	173510	817.503	0.105142	-2862.14	-5.02867	18.3763	0.438089	0.0527632	0.548504	0.0313426	1.27886	0.40273	0.560464	0.0550115	0.445753	0.406517	0.0170102	1.26461	404.581	20.553	20.553	345.094	2.99389	8.38269	342.71	3.24807	7.82632	340.605	8.54294	13.1515
Plesovice	Z_Plesovice	-0.0671506	177620	830.048	0.105673	-3157.44	-4.72825	18.1093	0.410438	0.0532291	0.556427	0.0312369	1.31469	0.412631	0.529001	0.0557101	0.404787	0.319953	0.0170067	1.25537	414.984	21.2838	21.2838	349.38	2.7526	8.3917	350.096	3.14319	7.94827	340.54	8.4778	13.1068
Plesovice	Z_Plesovice	-0.195427	180407	845.469	0.10652	-2768.67	-5.14703	18.2248	0.403136	0.0530059	0.546421	0.0315679	1.32382	0.406805	0.543007	0.0554127	0.412415	0.287911	0.0170871	1.32711	409.877	20.1614	20.1614	347.561	2.78918	8.36313	345.697	3.17743	7.86015	342.098	9.00388	13.4876
Plesovice	Z_Plesovice	0.249832	184990	871.371	0.107264	-3107.63	-4.84986	18.0422	0.420183	0.0525014	0.554719	0.032116	1.17302	0.407085	0.57156	0.0559511	0.418102	0.456293	0.0174304	1.15862	402.857	19.9686	19.9686	350.844	2.85379	8.45341	345.805	3.34796	7.93741	348.993	8.01927	13.0101
Plesovice	Z_Plesovice	0.615623	182632	840.475	0.105459	-2808.33	-4.96557	18.2121	0.406753	0.0529966	0.546411	0.0315404	1.22889	0.404138	0.533474	0.0554711	0.40964	0.377453	0.0171362	1.2214	411.402	20.6923	20.6923	347.919	2.77398	8.36761	343.806	3.1135	7.81759	343.623	8.36463	13.1423
Plesovice	Z_Plesovice	0.0484703	184160	854.511	0.106869	-2918.82	-4.88726	18.2521	0.40254	0.0532642	0.539847	0.0320742	1.27117	0.406534	0.541461	0.0552987	0.405314	0.346245	0.0170858	1.23479	433.444	19.9747	19.9747	346.869	2.73729	8.33545	345.509	3.16654	7.85213	342.122	8.37673	13.0765
Plesovice	Z_Plesovice	0.214699	184503	693.639	0.106235	-2669.88	-5.04335	17.9994	0.408414	0.0530535	0.569693	0.0318889	1.22243	0.41254	0.56926	0.0560633	0.398915	0.11404	0.0173505	1.21485	410.05	20.7853	20.7853	351.703	2.74593	8.4815	349.728	3.36165	7.99651	347.382	8.36963	13.1923
Plesovice	Z_Plesovice	0.125229	185272	700.445	0.107013	-2835.24	-4.83568	18.156	0.414921	0.0535294	0.520677	0.0323306	1.23194	0.412409	0.519066	0.0555848	0.412389	0.397398	0.0172102	1.18077	415.963	19.483	19.483	348.612	2.7987	8.39214	350.147	3.06811	7.88387	344.614	8.07058	12.9416
Plesovice	Z_Plesovice	0.670393	185465	867.186	0.108456	-2389.49	-5.38618	18.3438	0.439585	0.0531939	0.535728	0.0311206	1.25947	0.406268	0.536634	0.0551759	0.440044	0.394361	0.0164838	1.23925	412.357	20.0237	20.0237	346.101	2.96484	8.39556	345.671	3.18712	7.96265	330.173	8.11598	12.6426
Plesovice	Z_Plesovice	0.3914	188034	863.915	0.108408	-2708.88	-4.94246	17.9705	0.39885	0.0526083	0.534705	0.0319607	1.21251	0.409162	0.540204	0.0561672	0.394685	0.381893	0.0173389	1.19757	398.435	19.6227	19.6227	352.174	2.70545	8.4367	347.401	3.17375	7.8853	347.16	8.24342	13.1057
Plesovice	Z_Plesovice	0.406995	185558	829.415	0.107065	-2424.07	-5.11495	18.1667	0.432472	0.0532733	0.874985	0.0373609	11.1057	0.408199	0.840066	0.05566	0.419933	-0.0106636	0.0172841	1.2759	399.354	20.2549	20.2549	349.066	2.85273	8.4176	344.807	3.84164	6.80646	346.033	8.74751	13.3976
Plesovice	Z_Plesovice	-0.130093	185520	842.807	0.107713	-2595.39	-4.80126	18.4271	0.434124	0.0531797	0.546879	0.0317049	1.29797	0.4023	0.537792	0.0548155	0.424183	0.38467	0.0168487	1.23599	415.542	20.2248	20.2248	343.909	2.84044	8.30692	342.469	3.13046	7.8069	337.417	8.27117	12.9044
Plesovice	Z_Plesovice	0.307836	186459	812.13	0.107742	-2278.45	-5.0773	18.3574	0.421884	0.0529542	0.540993	0.0320558	1.24327	0.405124	0.55245	0.0549562	0.414571	0.42621	0.0172438	1.21684	408.404	20.1802	20.1802	344.773	2.78258	8.30475	345.015	3.2787	7.99523	345.264	8.3341	13.1235
Plesovice	Z_Plesovice	0.134751	187361	811.811	0.107508	-2323.22	-5.07099	18.1724	0.449384	0.0527786	0.52163	0.0324088	1.20671	0.40886	0.546076	0.0557124	0.439964	0.427485	0.017587	1.1888	395.888	19.2648	19.2648	349.376	2.98999	8.46826	347.164	3.20543	7.89261	352.084	8.30041	13.2552
Plesovice	Z_Plesovice	0.292983	189336	833.848	0.108078	-2178.93	-5.07477	17.9514	0.417746	0.0530486	0.553695	0.0315204	1.25788	0.415532	0.535375	0.056149	0.413544	0.35522	0.0170227	1.22915	414.776	21.3125	21.3125	352.054	2.83275	8.47326	351.975	3.18172	7.96494	340.871	8.30945	13.0066
Plesovice	Z_Plesovice	0.352613	186649	818.937	0.107801	-1990.23	-5.37205	18.0576	0.396281	0.0534345	0.515663	0.0326343	1.27898	0.416662	0.529546	0.0559076	0.391645	0.452094	0.0175176	1.19344	415.937	19.3868	19.3868	350.593	2.67136	8.38834	353.362	3.20653	8.10135	350.706	8.3028	13.2278
Plesovice	Z_Plesovice	0.398826	186978	867.856	0.107639	-2034.47	-5.0487	18.2494	0.409372	0.0528338	0.505962	0.0327689	1.22185	0.405531	0.525423	0.055293	0.405483	0.336082	0.0174093	1.2031	388.557	18.8169	18.8169	346.834	2.73758	8.33322	344.838	3.06453	7.79383	348.553	8.31766	13.1871
Plesovice	Z_Plesovice	0.108522	186712	861.49	0.107191	-1855.01	-5.57909	18.2162	0.408997	0.0527643	0.575063	0.0321278	1.82256	0.405277	0.53399	0.0554334	0.454195	0.11228	0.0170448	1.25313	399.172	19.6936	19.6936	347.137	2.88662	7.95157	344.628	3.118	7.82242	341.298	8.47992	13.1237
Plesovice	Z_Plesovice	0.114911	185020	877.014	0.108313	-1857.94	-5.0237	18.1779	0.43506	0.0534081	0.965305	0.0351981	9.50517	0.408262	0.56943	0.0557263	0.417869	0.0358001	0.0170282	1.265	420.618	20.5718	20.5718	349.472	2.84103	8.41984	346.657	3.34103	7.94549	340.962	8.55151	13.1623
Plesovice	Z_Plesovice	0.0993066	188096	900.666	0.108536	-1847.07	-5.0806	18.1864	0.405883	0.0531447	0.527574	0.0320562	1.2644	0.409576	0.527266	0.055527	0.408236	0.369044	0.0170233	1.24548	418.518	19.9541	19.9541	348.261	2.7664	8.37033	348.083	3.13647	7.95328	340.876	8.4189	13.0759
Plesovice	Z_Plesovice	0.0156691	193759	837.114	0.109817	-1765.1	-5.09935	18.141	0.406201	0.0530737	0.559052	-0.0257245	-239.477	0.410436	0.533289	0.0557562	0.402313	0.319345	0.0171367	1.17774	419.414	20.5179	20.5179	349.663	2.73772	8.39224	348.335	3.14059	7.88782	343.633	8.06494	12.9529
Plesovice	Z_Plesovice	0.371233	193639	838.889	0.109236	-1777.33	-5.02751	18.2217	0.398029	0.0530866	0.517267	0.0325751	1.23545	0.409182	0.506775	0.0554338	0.395433	0.371573	0.0169677	1.18964	407.205	19.3535	19.3535	347.699	2.6754	8.32878	347.687	2.99832	7.86336	339.798	8.01769	12.7982
Plesovice	Z_Plesovice	0.0947873	191008	873.486	0.109739	-1575.84	-5.18227	18.1528	0.406016	0.0526469	0.541288	0.0326931	1.18844	0.406883	0.520392	0.0555642	0.412168	0.344637	0.0171796	1.17183	398.948	20.0957	20.0957	348.486	2.79494	8.38471	346.005	3.06533	7.85934	344.012	7.99532	12.8807
Plesovice	Z_Plesovice	0.299451	189185	859.059	0.109621	-1528.79	-5.25158	18.1127	0.422474	0.0532844	0.545686	0.0316803	1.25328	0.412891	0.556498	0.055887	0.413253	0.0513264	0.0166387	1.21038	411.786	20.3158	20.3158	350.455	2.8193	8.43787	350.011	3.30902	8.01993	333.26	8.00069	12.6386
Plesovice	Z_Plesovice	0.131995	185347	770.972	0.108741	-1415.51	-7.06015	18.3895	0.403669	0.0528784	0.516042	0.0316441	1.16505	0.400009	0.534397	0.0549339	0.410579	0.100348	0.0165019	1.11217	394.164	19.5932	19.5932	344.639	2.75431	8.29146	341.193	3.05972	7.67125	331.009	7.33685	12.2135
Plesovice	Z_Plesovice	0.279666	187823	789.861	0.108448	-1516.82	-4.92522	18.579	0.408237	0.0528618	0.517212	0.0328718	1.17606	0.396878	0.517443	0.0543182	0.410216	0.352486	0.0170346	1.14571	401.524	20.0096	20.0096	341.036	2.73931	8.25266	338.785	2.99167	7.70778	341.147	7.75382	12.6675
Plesovice	Z_Plesovice	0.556528	187250	717.675	0.107256	-1406.12	-4.88248	18.3783	0.400028	0.0528708	0.550834	0.0321396	1.2206	0.399576	0.53339	0.0548759	0.402597	0.377189	0.0166991	1.22241	404.188	20.8911	20.8911	344.288	2.69975	8.27063	340.516	3.09024	7.76016	334.922	8.15768	12.8108
Plesovice	Z_Plesovice	0.549914	189663	728.663	0.107424	-1492.83	-4.71908	18.5133	0.3763	0.0528407	0.540907	0.0326029	1.20881	0.396691	0.530333	0.0543455	0.371405	0.323721	0.0167915	1.16449	401.889	20.1174	20.1174	341.062	2.46704	8.12715	338.44	3.05088	7.69864	336.313	7.77294	12.5711
Plesovice	Z_Plesovice	0.283904	191214	734.934	0.108246	-1155.47	-5.62805	18.3595	0.40543	0.0528042	0.548494	0.0320714	1.15465	0.404819	0.57138	0.0550589	0.411593	0.635428	0.0164993	1.09775	407.166	20.2936	20.2936	345.402	2.76648	8.30978	344.181	3.32217	7.87841	330.541	7.19983	12.0864
Plesovice	Z_Plesovice	9.69299e-05	190408	738.853	0.108217	-1405.27	-4.66928	18.4567	0.41331	0.0526063	0.536746	0.0331133	2.05127	0.400795	0.525605	0.0546965	0.411318	0.38166	0.0167838	1.17907	395.17	19.8884	19.8884	343.188	2.74863	8.26107	341.423	3.0444	7.74037	336.154	7.85673	12.6098
Plesovice	Z_Plesovice	-0.0422645	196319	728.467	0.108888	-1169.85	-5.20963	18.283	0.420227	0.052941	0.521494	0.0329889	1.22737	0.406181	0.506002	0.055361	0.414376	0.412358	0.0171363	1.19526	399.851	18.8194	18.8194	347.245	2.80126	8.3641	345.535	2.98119	7.82872	343.144	8.1357	12.9496
Plesovice	Z_Plesovice	0.151578	198958	741.911	0.11021	-1197.42	-6.54972	18.3884	0.384709	0.0530666	0.50027	0.0333341	1.19369	0.405676	0.521058	0.0548857	0.377114	0.45728	0.0169957	1.16095	392.126	18.7617	18.7617	344.361	2.52864	8.21592	344.957	3.04945	7.81069	340.834	7.88755	12.7805
Plesovice	Z_Plesovice	0.548376	192025	737.072	0.110383	-1105.01	-5.05812	18.2497	0.409837	0.0524442	0.538465	0.0330186	1.22992	0.402935	0.527247	0.055362	0.405993	0.36239	0.0170299	1.21833	387.644	20.3418	20.3418	347.255	2.74358	8.34217	343.133	3.08689	7.82773	341.019	8.23992	12.9657
Plesovice	Z_Plesovice	-0.149462	191116	738.339	0.110895	-981.687	-5.42777	18.3796	0.41611	0.0530779	0.54392	0.0333858	1.24047	0.405464	0.551014	0.0549348	0.404256	0.289307	0.0169298	1.20291	405.44	19.7827	19.7827	344.648	2.71227	8.2786	345.54	3.03862	7.4256	339.04	8.08951	12.8265
Plesovice	Z_Plesovice	0.282872	197046	720.086	0.111878	-991.805	-5.34587	18.2895	0.424546	0.0525904	0.531423	0.0325335	1.2044	0.400803	0.541019	0.0552084	0.424947	0.421611	0.0165484	1.20035	396.691	18.934	18.934	346.308	2.86436	8.36372	341.377	3.14241	7.79737	331.472	7.89264	12.5305
Plesovice	Z_Plesovice	0.0389377	196443	716.567	0.112908	-1012.66	-5.19485	18.3953	0.402614	0.0532491	0.551802	0.034732	2.13398	0.403525	0.550766	0.0549357	0.407084	0.149862	0.0170565	1.11844	423.417	20.2009	20.2009	344.652	2.73059	8.28271	343.315	3.2008	7.82478	341.593	7.57635	12.5671
Plesovice	Z_Plesovice	-0.21377	227440	840.308	0.170916	-1055.6	-5.34029	18.4422	0.406557	0.052995	0.478776	0.0506601	0.917013	0.400467	0.489593	0.0547291	0.407673	0.419015	0.0167366	0.898528	392.288	18.1754	18.1754	343.389	2.72567	8.25706	341.451	2.8568	7.71749	335.329	5.97583	11.5156
Plesovice	Z_Plesovice	-0.11418	221726	816.304	0.164739	-1023.37	-5.39701	18.4077	0.400589	0.0525578	0.495549	0.0476896	0.935629	0.398469	0.49793	0.0547876	0.398114	0.390774	0.0163434	0.909814	383.14	18.7418	18.7418	343.751	2.66492	8.24627	339.821	2.87734	7.66075	327.515	5.91313	11.2919
Plesovice	Z_Plesovice	0.256705	194051	769.063	0.112602	-830.834	-5.56292	18.4121	0.415666	0.0524608	0.538322	0.0335743	1.16323	0.39943	0.539408	0.0548489	0.416108	0.395429	0.0168831	1.1273	393.249	20.2302	20.2302	344.117	2.78736	8.29146	340.572	3.13547	7.7995	338.148	7.56168	12.4801
Plesovice	Z_Plesovice	0.184999	192584	759.502	0.112197	-828.84	-5.60904	18.505	0.445089	0.0530109	0.527316	0.0321872	1.20889	0.40182	0.533805	0.0545841	0.445914	0.152173	0.0161233	1.13053	408.866	19.2656	19.2656	342.939	2.83834	7.94496	342.32	3.11225	7.81033	323.061	7.24694	11.9391
Plesovice	Z_Plesovice	-0.360966	158629	598.646	0.120232	-754.754	-4.9158	18.931	0.42852	0.0531062	0.589711	0.0358428	1.21822	0.390575	0.565029	0.0532053	0.435055	0.336873	0.0161966	1.19394	434.054	20.8935	20.8935	334.061	2.83182	8.09946	334.089	3.19337	7.64302	324.49	7.68812	12.2453
Plesovice	Z_Plesovice	0.00332236	131948	488.328	0.096322	-551.47	-5.45756	18.7383	0.421999	0.052714	0.622795	0.0301209	1.47851	0.39336	0.599826	0.0538735	0.417796	0.277186	0.0171269	1.45022	444.142	23.428	23.428	338.319	2.76896	8.2076	335.805	3.42807	7.81397	342.82	9.86618	14.0976
Plesovice	Z_Plesovice	0.0393996	282874	1087.84	0.148464	-1046.78	-6.03095	18.3768	0.369383	0.0525216	0.477752	0.0449375	0.842143	0.400749	0.442545	0.0548234	0.37128	0.325415	0.016868	0.825116	373.44	18.4428	18.4428	343.983	2.48618	8.19273	341.768	2.57996	7.6133	337.963	5.53132	11.36
Plesovice	Z_Plesovice	0.086839	260655	1003.98	0.142589	-1050.71	-5.51242	18.4357	0.388658	0.052293	0.483827	0.042124	0.940756	0.397367	0.455864	0.054692	0.382208	0.370907	0.0164436	0.890238	370.483	18.3044	18.3044	343.175	2.55393	8.19782	339.29	2.64412	7.60124	329.513	5.81942	11.2909
Plesovice	Z_Plesovice	0.064559	180988	693.105	0.129992	-767.966	-5.16435	18.6192	0.388436	0.0528083	0.542452	0.0390943	1.16011	0.398716	0.51907	0.0541785	0.397095	0.316357	0.016569	1.1008	401.503	20.4774	20.4774	340.03	2.62987	8.15637	339.939	2.9972	7.70159	331.925	7.24826	12.1459
Plesovice	Z_Plesovice	-0.518388	213953	809.939	0.109626	-886.618	-5.26212	18.391	0.404622	0.0526502	0.535335	0.03331	1.07209	0.405097	0.572263	0.0549493	0.417381	0.00190569	0.0170782	1.05938	396.648	19.2983	19.2983	344.729	2.80251	8.31425	343.876	3.07966	7.29401	342.05	7.18731	12.349
Plesovice	Z_Plesovice	0.282444	204798	795.103	0.11763	-722.37	-5.95757	18.7491	0.40054	0.053125	0.552485	0.0355452	1.11144	0.396791	0.536904	0.0538101	0.396307	0.33843	0.0167263	1.11265	410.278	20.5668	20.5668	337.779	2.60769	8.10214	338.492	3.09372	7.72618	335.043	7.39465	12.3064
Plesovice	Z_Plesovice	0.176358	210597	812.476	0.109987	-762.072	-5.84447	18.4502	0.386478	0.0537291	0.528893	0.036198	1.20713	0.406873	0.537476	0.0546236	0.389298	0.404023	0.0183195	1.16483	426.21	19.9616	19.9616	342.754	2.59766	8.20132	346.142	3.17842	7.93075	366.617	8.46144	13.6822
Plesovice	Z_Plesovice	0.508189	193898	722.326	0.105342	-725.167	-5.72114	18.4739	0.395547	0.0526813	0.527312	0.0310734	1.2725	0.400457	0.54516	0.0546037	0.395982	0.407515	0.0163017	1.24644	396.711	19.7255	19.7255	342.629	2.64136	8.21259	341.115	3.16596	7.80608	326.554	8.07328	12.5335
Plesovice	Z_Plesovice	0.430849	194493	728.068	0.104984	-663.252	-6.21186	18.3636	0.405394	0.0527019	0.526969	0.0311754	1.23501	0.402164	0.505351	0.0549433	0.395647	0.351732	0.0164745	1.19375	400.063	20.4188	20.4188	344.704	2.65628	8.26531	342.471	2.93821	7.72425	330.476	7.86562	12.5293
Plesovice	Z_Plesovice	0.982683	187511	669.67	0.104543	-665.287	-5.78101	18.2238	0.423931	0.0530591	0.54233	0.0310926	1.19578	0.408218	0.547649	0.0553565	0.424334	0.0876296	0.0166614	1.1484	405.536	20.1569	20.1569	347.213	2.86792	8.38464	346.703	3.2114	7.88787	333.739	7.60233	12.4018
Plesovice	Z_Plesovice	0.406243	189392	682.861	0.104747	-636.636	-6.01261	18.5278	0.397338	0.0534857	0.562898	0.0342873	5.46963	0.403948	0.547738	0.0544157	0.401199	0.164409	0.0171436	1.2295	418.225	21.233	21.233	341.478	2.66826	8.19953	343.629	3.18272	7.81639	343.269	8.36957	13.0985
Plesovice	Z_Plesovice	0.348037	176410	637.672	0.120888	-629.215	-5.71635	18.7144	0.401664	0.0523669	0.558802	0.0363757	1.16094	0.391662	0.549594	0.0538053	0.399469	0.341965	0.0162517	1.12674	405.787	19.7157	19.7157	337.748	2.62776	8.10658	334.736	3.13605	7.68034	325.613	7.27966	12.0185
Plesovice	Z_Plesovice	0.240928	186695	666.223	0.104467	-639.667	-5.86368	18.6989	0.429831	0.0528786	0.527463	0.030854	1.24086	0.39764	0.554001	0.0540588	0.436208	0.428033	0.0159884	1.19673	399.682	20.9699	20.9699	339.28	2.88228	8.2246	339.423	3.18324	7.74408	320.355	7.60788	12.1004
13C_ROV7-1_Grain_137	13C_ROV7-1_Grain_137	4.90232	7160.81	327.858	0.421761	-108.673	-5.39705	124.933	1.24401	0.0511914	2.88053	0.154438	3.91178	0.0595361	2.69112	0.00867845	1.18327	0.0929137	0.00267299	3.31075	1125.25	77.3934	77.3934	55.6801	1.31197	1.84174	58.0863	3.06791	3.37253	53.8998	3.56576	3.9059
13C_ROV7-1_Grain_136	13C_ROV7-1_Grain_137	-5.82474	4719.72	212.79	0.247519	-71.3612	-5.45723	126.3	1.69755	0.0532898	4.33618	0.395645	71.9582	0.0610476	3.9565	0.00903309	1.36399	-0.000869488	0.00355372	10.8263	1366.44	92.5572	92.5572	57.9359	1.57368	2.07015	58.0051	4.49495	4.70669	64.6566	7.42508	7.49415
13C_ROV7-1_Grain_135	13C_ROV7-1_Grain_137	1.38154	4559.93	213.521	0.183061	-63.6709	-5.7132	128.416	1.64211	0.0518703	4.10941	0.0822954	7.65802	0.0587636	3.84407	0.00888196	1.45672	0.045888	0.00318108	7.17779	1380.8	95.7051	95.7051	56.9668	1.65242	2.11642	56.3875	4.27451	4.48755	63.8281	9.18166	9.37484
13C_ROV7-1_Grain_134 core	13C_ROV7-1_Grain_137	-0.663836	9299.16	451.571	0.829318	-138.048	-5.96229	125.287	1.23131	0.0585819	2.93429	0.334768	2.54136	0.0661669	2.74084	0.00865358	1.19445	0.115218	0.00311429	2.03558	1222.53	83.5618	83.5618	55.5209	1.32062	1.84539	64.4701	3.4489	3.77961	62.8206	2.55313	3.15679
13C_ROV7-1_Grain_134 rim	13C_ROV7-1_Grain_137	14.3799	5533.92	238.125	0.188756	-89.4751	-5.19827	117.704	1.33685	0.130079	2.79614	0.280386	3.95221	0.159452	2.52721	0.0093572	1.2739	0.148745	0.0129842	3.30141	2085.14	84.0328	84.0328	60.0084	1.52156	2.06253	146.433	6.98317	7.76476	259.488	17.0453	18.6801
13C_ROV7-1_Grain_133 core	13C_ROV7-1_Grain_137	0.859468	125630	730.774	0.583606	-1936.49	-5.26991	15.3845	0.624997	0.0577021	0.735425	0.188798	1.0906	0.534208	0.723498	0.0662452	0.639461	0.390791	0.0213001	0.856012	590.438	27.2013	27.2013	413.134	5.1096	10.6243	432.609	5.11758	10.0855	425.773	7.20991	14.402
13C_ROV7-1_Grain_133 rim	13C_ROV7-1_Grain_137	15.7286	9500.41	315.336	0.136644	-133.334	-7.34845	103.124	1.2815	0.0542974	2.91398	0.0642353	6.49108	0.0750041	2.70858	0.0102318	1.232	0.0789422	0.00455831	6.25481	1054.15	82.3625	82.3625	65.6015	1.60824	2.21411	72.6622	3.81399	4.18804	91.5744	11.4498	11.7661
13C_ROV7-1_Grain_132 core	13C_ROV7-1_Grain_137	0.00124331	59838.2	100.521	0.52464	-961.34	-5.06356	5.09731	0.741409	0.0865873	0.819953	0.158096	1.27812	2.42095	0.839916	0.201416	0.756696	0.48833	0.0615044	1.25093	1305.77	33.1685	33.1685	1180.41	16.3457	30.0217	1238.58	12.3734	21.9248	1202.8	29.2029	45.2402
13C_ROV7-1_Grain_132 rim	13C_ROV7-1_Grain_137	16.3237	3712.9	133.072	0.166704	-58.1624	-5.45864	136.542	2.0914	0.0458562	5.09801	0.0546812	14.7491	0.053753	4.44917	0.00886147	1.54069	0.0665096	0.00207191	13.5851	1484.65	103.649	103.649	56.8318	1.7438	2.18675	51.3611	4.55216	4.72255	41.2775	11.3254	11.3924
13C_ROV7-1_Grain_131	13C_ROV7-1_Grain_137	19.6448	2918.84	98.443	0.572344	-46.8091	-5.79738	139.994	2.31733	0.0768638	5.7685	0.283036	7.22964	0.0823041	4.64597	0.00897586	1.83694	0.0747371	0.00348324	4.33849	1917.35	107.067	107.067	57.5437	2.10448	2.4925	76.3568	7.09036	7.33411	70.121	6.07974	6.42383
13C_ROV7-1_Grain_130 core	13C_ROV7-1_Grain_137	0.156307	311917	716.211	0.855665	-4678.07	-5.12941	8.17526	0.590675	0.0648136	0.550375	0.256898	0.7234	1.12749	0.636338	0.12465	0.597087	0.679263	0.0381839	0.626401	752.979	22.385	22.385	756.287	8.49227	18.6287	761.439	6.30392	13.7073	757.036	9.30281	23.8673
13C_ROV7-1_Grain_130 rim	13C_ROV7-1_Grain_137	-0.200759	5483.48	171.771	0.202071	-82.4842	-5.56123	127.846	1.58194	0.05315	4.13188	0.0894719	18.6749	0.0579823	3.46548	0.00875504	1.28687	-0.00618641	0.00287824	6.89935	1288.57	91.6244	91.6244	56.2526	1.44892	1.95506	55.964	3.81532	4.04801	57.8149	7.98209	8.16372
13C_ROV7-1_Grain_129 core	13C_ROV7-1_Grain_137	0.548393	81189	415.844	0.56927	-1245.15	-5.87634	19.3391	0.781435	0.0529298	0.999179	0.182795	1.17482	0.388876	1.03023	0.0531342	0.79805	0.412089	0.0170597	1.09201	519.402	34.7385	34.7385	333.448	5.18178	9.17324	331.249	5.81502	9.0504	341.72	7.39949	12.4634
13C_ROV7-1_Grain_129 rim	13C_ROV7-1_Grain_137	9.73918	9634.6	278.195	0.138109	-139.031	-5.41113	120.056	1.04113	0.0482006	2.49222	0.0430376	6.39936	0.0566507	2.27437	0.008809	1.02421	0.0561181	0.00260144	6.04514	1001.88	68.399	68.399	56.5197	1.1526	1.74633	55.5698	2.48022	2.81898	52.3387	6.33232	6.51937
13C_ROV7-1_Grain_128	13C_ROV7-1_Grain_137	6.80549	3930.97	127.033	0.241436	-61.1547	-5.58493	130.598	1.79565	0.0493609	5.0529	0.1009	10.6029	0.0569798	4.49501	0.00902077	1.54962	-0.0114031	0.00283301	7.77168	1535.09	104.089	104.089	57.8476	1.7845	2.2331	54.7674	4.91582	5.09614	56.8402	8.85273	9.01185
13C_ROV7-1_Grain_127 A	13C_ROV7-1_Grain_137	3.15644	4213.23	144.572	0.500017	-61.6901	-5.71331	130.364	1.85513	0.0507597	4.49754	0.203773	5.81251	0.0597746	3.90614	0.00901998	1.4947	0.037784	0.00305317	4.17916	1519.1	105.058	105.058	57.8456	1.7218	2.18358	57.4983	4.45349	4.6686	61.5028	5.13742	5.45011
13C_ROV7-1_Grain_127 B	13C_ROV7-1_Grain_137	20.1961	5067.56	195.995	0.151522	-75.6891	-6.01797	130.653	1.55471	0.0454914	4.26721	0.0523994	11.1401	0.0520332	3.90804	0.00859391	1.3813	0.023972	0.0022763	10.7189	1431.69	103.732	103.732	55.1319	1.5168	1.98482	50.6274	3.92538	4.11479	45.5379	9.81492	9.90806
13C_ROV7-1_Grain_126	13C_ROV7-1_Grain_137	1.02826	48721.4	52.7864	0.674034	-752.341	-7.59539	3.38278	0.915393	0.114341	1.04037	0.196637	1.59955	4.7575	0.960302	0.302903	0.918937	0.388851	0.090934	1.52567	1836.61	37.3149	37.3149	1703.28	27.7295	44.7939	1769.55	16.5083	26.8082	1753.91	51.1842	71.3131
13C_ROV7-1_Grain_125	13C_ROV7-1_Grain_137	-7.08512	4451.45	195.916	0.512468	-75.8087	-7.82979	125.853	2.58254	0.0510738	6.72916	0.201857	8.04994	0.0587189	6.28229	0.00897813	2.21933	0.0500588	0.00282278	5.65862	1437.66	148.858	148.858	57.5823	2.54454	2.87424	56.198	6.97076	7.10282	56.9005	6.43663	6.65319
13C_ROV7-1_Grain_181	13C_ROV7-1_Grain_137	-14.4913	3993.16	180.58	0.546355	-64.1595	-5.55332	134.975	1.79452	0.056961	4.62071	0.236929	7.3264	0.057861	4.01272	0.00867843	1.55926	-0.0105275	0.00292664	4.10062	1510.83	97.3013	97.3013	55.6627	1.72784	2.15738	55.416	4.42239	4.62504	58.9661	4.83296	5.13817
13C_ROV7-1_Grain_182 A	13C_ROV7-1_Grain_137	-24.8675	4223.38	194.947	0.737059	-66.0979	-5.5923	130.565	1.77288	0.0525762	4.2638	0.287787	4.93573	0.0579306	3.98565	0.0088713	1.4869	0.0356371	0.00298397	3.14866	1437.14	92.2762	92.2762	56.8973	1.68452	2.14057	56.2804	4.46604	4.67343	60.3987	3.81113	4.21122
13C_ROV7-1_Grain_182 B	13C_ROV7-1_Grain_137	75.5492	3724.99	177.77	0.720831	-66.2915	-5.27276	137.609	2.02591	0.0533614	5.77759	0.295336	6.62449	0.0544067	4.78295	0.00880467	1.63027	0.0311925	0.00276719	3.57385	1559.98	109.933	109.933	56.4645	1.83282	2.25321	51.6843	4.91253	5.07202	55.7849	3.98351	4.31164
13C_ROV7-1_Grain_83	13C_ROV7-1_Grain_137	-22.8825	5075.86	234.649	0.194443	-82.2444	-5.38177	122.446	1.52179	0.0484001	3.76035	0.0672007	8.5769	0.0588399	3.4386	0.0091982	1.37943	0.111403	0.00262605	7.74451	1300.63	87.9606	87.9606	58.9886	1.62013	2.12122	56.7718	3.84133	4.07919	52.718	8.18396	8.33209
13C_ROV7-1_Grain_184 A	13C_ROV7-1_Grain_137	3.86312	5633.09	267.879	0.322161	-85.2802	-5.58276	131.038	1.67504	0.0538625	3.78502	0.115427	5.77948	0.0557294	3.26478	0.00870052	1.31719	-0.020758	0.00265666	4.78495	1352.4	93.5492	93.5492	55.8154	1.46384	1.95486	54.0194	3.4712	3.70887	53.5118	5.11989	5.35925
13C_ROV7-1_Grain_184 B	13C_ROV7-1_Grain_137	-41.9348	4207.46	202.47	0.319879	-62.0308	-5.68288	142.716	1.80904	0.0531146	4.74206	0.130277	8.52624	0.0516865	4.15012	0.0082842	1.56532	0.00155525	0.00253771	5.95544	1481.53	100.216	100.216	53.146	1.65644	2.06536	49.7144	4.08715	4.2625	51.067	6.08413	6.26923
13C_ROV7-1_Grain_184 C	13C_ROV7-1_Grain_137	-14.0671	8959.45	399.26	0.361497	-147.661	-5.44913	132.617	1.21044	0.051929	2.86195	0.146324	3.63288	0.0542623	2.58484	0.00815035	1.13784	0.0191435	0.00259518	4.4539	1061.53	73.1593	73.1593	52.3085	1.18545	1.69722	53.1983	2.70287	2.9927	52.2924	4.6575	4.90794
13C_ROV7-1_Grain_184 D	13C_ROV7-1_Grain_137	7.00781	4515.51	178.22	0.250966	-69.7125	-5.56621	137.251	1.71789	0.050187	4.65103	0.0856197	7.97096	0.0497558	4.08771	0.0083921	1.42641	-0.0493069	0.00228674	7.41668	1462.93	103.986	103.986	53.8413	1.52972	1.97563	47.9833	3.89876	4.07106	45.9644	6.83213	6.96686
13C_ROV7-1_Grain_176 A	13C_ROV7-1_Grain_137	8.66453	3925.38	136.647	0.49958	-71.9937	-5.57586	137.273	2.01465	0.06679	4.08133	0.239528	5.47153	0.0673924	3.69391	0.00855449	1.67638	0.00764739	0.00342045	4.2667	1586.84	102.82	102.82	54.8722	1.83206	2.23151	65.7714	4.8446	5.10556	68.8889	5.87299	6.21634
13C_ROV7-1_Grain_176 B	13C_ROV7-1_Grain_137	-15.1654	4662.74	94.0879	0.222247	-75.9059	-6.57196	134.973	2.03791	0.0533195	4.8388	0.103322	12.5814	0.0563827	4.28973	0.00866091	1.72419	0.0579743	0.00300771	7.97596	1359.06	107.491	107.491	55.5528	1.9072	2.30223	54.2518	4.61935	4.80509	60.3858	9.65067	9.81544
13C_ROV7-1_Grain_176 C	13C_ROV7-1_Grain_137	16.5303	4434.61	79.3564	0.405504	-72.1922	-7.60067	129.625	2.27242	0.0530592	5.74363	0.138121	8.39951	0.0568337	5.25108	0.00885965	1.88242	0.0500666	0.00263218	6.90082	1431.45	128.098	128.098	56.8277	2.12991	2.50528	55.0422	5.74711	5.90233	53.0056	7.31456	7.48092
13C_ROV7-1_Grain_185	13C_ROV7-1_Grain_137	4.76608	10757.8	205.42	0.827671	-168.982	-5.51305	119.618	1.12545	0.0879889	1.9511	0.38367	2.1932	0.105576	1.82014	0.00892641	1.06336	0.121859	0.00393927	1.70642	1491.04	62.3241	62.3241	57.267	1.21244	1.79912	100.996	3.5243	4.25219	79.4317	2.7053	3.58125
13C_ROV7-1_Grain_177 A	13C_ROV7-1_Grain_137	-13.2443	3273.5	63.902	0.586514	-58.2129	-5.3643	140.133	2.11748	0.0542703	5.31121	0.250078	8.18139	0.0547745	4.77582	0.00884375	1.68847	0.0455174	0.00277116	4.82081	1657.24	107.729	107.729	56.7104	1.90629	2.3165	52.5886	5.06598	5.23093	56.1331	5.41427	5.66372
13C_ROV7-1_Grain_177 B	common lead	14.8659	5710.16	69.7669	0.582834	-78.1757	-6.126	81.6986	2.33608	0.357582	2.8625	1.03938	2.9879	0.989309	3.33196	0.0165931	1.96252	0.74017	0.039155	3.61052	3088.94	106.375	106.375	105.839	4.11873	4.79069	591.428	33.9879	36.2251	762.397	54.3284	58.7165
13C_ROV7-1_Grain_177 C	13C_ROV7-1_Grain_137	18.415	4601.67	95.9274	0.484072	-77.87	-5.51833	131.359	1.70854	0.0519839	4.15913	0.1843	6.29906	0.0558312	3.92692	0.00871011	1.38193	0.0503184	0.00285828	4.06002	1366	90.6465	90.6465	55.8736	1.53774	2.01183	53.8736	4.21392	4.41536	57.8715	4.70406	5.00692
13C_ROV7-1_Grain_178 A	13C_ROV7-1_Grain_137	-11.8125	2250.29	50.2991	0.431786	-37.4119	-6.08426	160.372	3.02933	0.0596186	8.84168	0.241595	11.171	0.0602731	6.22631	0.00845715	2.05875	0.0994742	0.00316987	6.66215	1958.5	115.054	115.054	54.2217	2.22307	2.55474	55.4684	7.11638	7.25362	63.655	8.49858	8.7058
13C_ROV7-1_Grain_178 B	13C_ROV7-1_Grain_137	5.95058	4697.32	111.397	0.818573	-75.1007	-5.58102	137.466	1.62899	0.0598138	4.05805	0.311825	4.72234	0.060714	3.66192	0.0083324	1.43726	-0.00904708	0.00268997	2.98212	1508.76	98.1285	98.1285	53.4597	1.53028	1.97037	58.5517	4.24133	4.47369	54.252	3.23272	3.60902
13C_ROV7-1_Grain_178 C	13C_ROV7-1_Grain_137	30.7853	4017.11	96.2909	0.699892	-67.9995	-7.69266	137.563	2.87613	0.0532889	7.19522	0.260638	5.38585	0.0549954	5.92191	0.00906845	2.29244	0.0956972	0.00285581	4.68567	1495.5	148.69	148.69	58.1422	2.65322	2.97659	52.9985	6.26353	6.39691	57.57	5.39074	5.6533
13C_ROV7-1_Grain_178 D	13C_ROV7-1_Grain_137	-50.4739	3680.6	89.9499	0.53107	-61.6556	-5.43068	136.556	2.02272	0.0525435	4.8951	0.20511	8.72695	0.0575564	4.42786	0.0088146	1.576	0.0595243	0.00259413	5.19097	1526.84	102.804	102.804	56.5307	1.77396	2.20654	54.7731	4.85284	5.0362	52.2374	5.42416	5.64035
13C_ROV7-1_Grain_179 A	13C_ROV7-1_Grain_137	-9.01602	5417.23	147.805	0.359092	-94.2907	-5.66299	132.626	1.41591	0.0528046	3.92445	0.145307	5.11029	0.056446	3.51952	0.00836699	1.35748	0.0278599	0.00280791	4.83844	1308.68	89.0127	89.0127	53.6841	1.4513	1.91302	54.7198	3.81605	4.0419	56.5447	5.47185	5.72217
13C_ROV7-1_Grain_179 B	13C_ROV7-1_Grain_137	-10.0506	5124.12	144.337	0.323516	-91.9059	-5.29586	134.102	1.46859	0.0518842	4.05019	0.126144	5.68056	0.0556745	3.55233	0.00826908	1.37563	0.070044	0.00283711	5.10127	1344.38	95.0807	95.0807	53.058	1.45368	1.90546	53.7775	3.77501	3.99443	57.1157	5.82894	6.06935
13C_ROV7-1_Grain_179 C	13C_ROV7-1_Grain_137	-4.77877	5655.86	157.253	0.372416	-85.6002	-5.92958	126.881	1.38035	0.053695	4.09094	0.139444	4.8263	0.0581081	3.65797	0.00873535	1.32752	0.0234271	0.0028698	4.46401	1233.08	89.7037	89.7037	56.0373	1.48085	1.97079	55.3814	3.76024	3.96668	57.8064	5.15818	5.43434
13C_ROV7-1_Grain_180	13C_ROV7-1_Grain_137	-7.36763	4800.03	141.788	0.276294	-86.5105	-5.20198	134.964	1.53258	0.0578938	4.01501	0.111897	6.44673	0.0597121	3.56422	0.00834893	1.39283	0.0442406	0.00299687	5.52269	1517.86	95.9575	95.9575	53.5671	1.48592	1.93771	58.4275	4.12786	4.36623	60.2897	6.66089	6.89597
13C_ROV7-1_Grain_166 A	13C_ROV7-1_Grain_137	-5.83694	6269.12	168.59	0.448823	-105.912	-5.41226	122.907	1.32674	0.0518892	3.50708	0.183379	4.04524	0.0585313	3.18571	0.00894211	1.30028	0.105878	0.00294429	3.55071	1251.14	88.4316	88.4316	57.3584	1.48465	1.99396	57.3007	3.60928	3.86841	59.3463	4.21158	4.56287
13C_ROV7-1_Grain_166 B	13C_ROV7-1_Grain_137	13.2293	5015.38	132.483	0.340604	-83.2173	-5.60618	125.999	1.66159	0.130729	3.71921	0.305502	4.90903	0.143306	2.36605	0.00912732	1.38673	-0.0245235	0.00670707	3.10274	2078.89	79.6954	79.6954	58.5361	1.61591	2.11105	132.903	5.95509	6.71011	134.81	8.34442	9.24527
13C_ROV7-1_Grain_166 C	13C_ROV7-1_Grain_137	-5.17903	3856.28	106.392	0.281964	-60.7282	-5.74322	133.927	1.79481	0.0525774	4.99918	0.117607	6.90196	0.0588708	4.5789	0.00879662	1.56959	0.0829999	0.0030443	6.12788	1616.12	97.4906	97.4906	56.4164	1.76312	2.19623	56.091	5.14879	5.33092	61.1936	7.50775	7.72366
13C_ROV7-1_Grain_167	13C_ROV7-1_Grain_137	13.0847	4565.71	123.357	0.397802	-81.7771	-5.61957	130.524	1.74525	0.0639659	3.70906	0.197947	5.15034	0.0718964	3.5432	0.00884321	1.40347	0.144795	0.00348268	4.87847	1532.8	88.5498	88.5498	56.7223	1.58514	2.06066	69.3621	4.86226	5.14629	70.0676	6.83746	7.14525
13C_ROV7-1_Grain_168 A	13C_ROV7-1_Grain_137	21.7465	4577.96	102.565	0.583249	-78.021	-5.56705	114.157	2.21426	0.255343	3.4016	0.708908	3.51348	0.356049	2.82781	0.0107829	1.59003	0.174136	0.0114745	2.67087	2980.16	85.1801	85.1801	69.073	2.18547	2.70997	289.507	15.0014	16.3563	229.945	12.2284	13.9807
13C_ROV7-1_Grain_168 B	13C_ROV7-1_Grain_137	25.7895	4103.82	96.6632	0.520361	-73.9714	-5.29424	114.241	1.79758	0.196275	2.71426	0.563296	3.64876	0.25096	2.33744	0.0101013	1.54505	0.207943	0.00948214	2.69375	2598.38	80.7987	80.7987	64.7364	1.99038	2.49338	223.363	9.77459	11.0427	190.299	10.2096	11.6494
13C_ROV7-1_Grain_169 A	13C_ROV7-1_Grain_137	15.6656	6946.64	152.388	0.389295	-121.375	-5.35531	95.4046	1.507	0.220069	3.19619	0.579537	3.73553	0.381383	3.35455	0.0118825	1.47384	0.369898	0.0179956	3.53496	2611.02	97.4304	97.4304	76.08	2.22793	2.84069	300.199	17.4667	18.6014	359.275	25.2172	27.3386
13C_ROV7-1_Grain_169 B	13C_ROV7-1_Grain_137	11.6448	6225.44	153.928	0.390045	-97.6707	-5.66308	113.305	1.61474	0.114019	4.39896	0.350185	5.16087	0.160967	5.33344	0.0100978	1.50303	0.538798	0.00795222	5.40978	1929.39	116.831	116.831	64.7174	1.93452	2.44825	136.317	12.5301	12.8582	158.831	17.0001	17.6249
13C_ROV7-1_Grain_X A	13C_ROV7-1_Grain_137	23.2672	6113.13	164.129	0.33724	-220.847	-52.3906	125.717	1.42328	0.0497839	3.682	0.135768	5.06901	0.0565685	3.3411	0.00896241	1.45494	0.0486282	0.00290057	4.78072	1202.1	84.8928	84.8928	57.4804	1.66275	2.13065	54.7478	3.59684	3.83234	58.4066	5.5836	5.84509
13C_ROV7-1_Grain_X B	13C_ROV7-1_Grain_137	0.684152	4575.16	125.669	0.244347	-73.6253	-5.5355	131.085	1.65502	0.0552499	5.51579	0.110033	9.2196	0.0553211	4.03283	0.00871025	1.41037	0.0140131	0.00335271	6.6885	1386.18	101.804	101.804	55.8732	1.56904	2.03566	53.1194	4.21608	4.4074	67.2991	9.01171	9.22973
13C_ROV7-1_Grain_X C	13C_ROV7-1_Grain_137	12.8569	4516.88	121.125	0.195601	-71.3555	-5.74708	127.294	1.6385	0.0551711	4.96069	0.0793891	9.62628	0.0585867	3.99081	0.0090006	1.44709	-0.0167523	0.00307805	8.44616	1523.37	95.9436	95.9436	57.7244	1.66324	2.13583	56.1025	4.42742	4.6325	61.6437	10.4524	10.6117
13C_ROV7-1_Grain_175 A	13C_ROV7-1_Grain_137	2.57543	8721.34	251.977	0.674146	-140.389	-5.61015	128.351	1.20914	0.0541691	3.54948	0.231691	2.62216	0.059243	4.25077	0.00840145	1.14962	0.030605	0.00257628	2.30431	1039.01	68.3639	68.3639	53.9123	1.23423	1.75777	55.7961	2.79638	2.91085	52.1447	2.41285	2.86773
13C_ROV7-1_Grain_175 B	13C_ROV7-1_Grain_137	-4.56132	9911.51	288.925	0.867607	-181.595	-5.1795	125.389	1.17031	0.0478994	2.69437	0.277988	2.42163	0.0540762	2.49977	0.00853633	1.08778	0.0956737	0.00263297	2.03041	1013.32	72.9726	72.9726	54.776	1.18661	1.73933	52.8919	2.59434	2.89077	53.128	2.15496	2.66677
13C_ROV7-1_Grain_175 C	13C_ROV7-1_Grain_137	8.9166	7167.42	210.621	0.762914	-120.212	-5.72541	130.262	1.39418	0.0529604	3.27049	0.269494	4.3884	0.0570721	2.95216	0.00845384	1.24684	0.0695017	0.00258104	2.68699	1246.46	81.686	81.686	54.2432	1.34694	1.84399	55.6458	3.23704	3.5062	52.0674	2.79569	3.1918
13C_ROV7-1_Grain_173 A	13C_ROV7-1_Grain_137	-16.243	3736.86	107.565	0.33099	-64.7792	-5.48534	133.307	2.21966	0.0578912	5.44882	0.154486	11.6782	0.0617761	4.40312	0.00907124	1.53202	0.016311	0.00297379	6.16856	1569.85	107.788	107.788	58.1705	1.77486	2.23029	58.8548	5.16887	5.36633	60.221	7.42963	7.64053
13C_ROV7-1_Grain_173 B	13C_ROV7-1_Grain_137	23.9617	5974.93	177.333	0.55959	-118.531	-4.93253	125.909	1.34546	0.0528916	3.43097	0.196602	3.53225	0.0596927	3.17126	0.00874763	1.2693	0.050855	0.00281679	3.21257	1352.58	81.3657	81.3657	56.1182	1.41809	1.92545	57.9492	3.62439	3.8869	56.7959	3.64586	4.01422
13C_ROV7-1_Grain_172 A	13C_ROV7-1_Grain_137	13.4576	4996.05	147.477	0.348125	-79.5793	-6.12752	132.659	1.9651	0.0495936	4.73652	0.154678	7.02613	0.0543704	4.37919	0.00900574	1.55414	0.0490804	0.0030306	5.45375	1463.29	100.839	100.839	57.7515	1.78728	2.23423	52.7558	4.62954	4.8083	60.9703	6.65554	6.89631
13C_ROV7-1_Grain_172 B	13C_ROV7-1_Grain_137	5.41984	4610.25	133.395	0.372437	-72.0627	-6.40126	129.783	1.97324	0.0519052	4.99446	0.153278	6.77093	0.0589959	4.51859	0.00913076	1.4958	0.00507956	0.00279389	6.28081	1524.88	100.618	100.618	58.5522	1.74399	2.21111	56.5449	5.12436	5.31042	56.1754	7.06683	7.26042
13C_ROV7-1_Grain_152 A	13C_ROV7-1_Grain_137	-2.24417	6294.15	186.804	0.998329	-106.799	-5.46111	127.471	1.41002	0.0523845	3.68245	0.336382	3.10736	0.056844	3.2036	0.00863651	1.26991	-0.00869767	0.002675	2.37964	1174.49	83.6438	83.6438	55.4088	1.40144	1.90242	55.095	3.46519	3.71129	53.967	2.56554	3.02134
13C_ROV7-1_Grain_152 B	13C_ROV7-1_Grain_137	16.674	2874.26	78.9159	0.462336	-48.9024	-5.71785	135.181	2.2251	0.0759336	8.0663	0.325106	20.2876	0.0728464	6.72479	0.00918351	1.78399	-0.0651158	0.00343741	6.36228	1832.07	115.875	115.875	58.8709	2.09115	2.49805	64.1415	6.99335	7.10912	69.0243	8.75792	8.9918
13C_ROV7-1_Grain_151 A	common lead	32.0308	7325.8	125.522	0.554189	-105.122	-9.15913	75.3434	1.36917	0.388944	1.64807	1.05533	2.21931	0.758296	1.48062	0.0147652	1.31906	0.124786	0.0264883	1.50334	3654.23	45.9792	45.9792	94.4	2.47064	3.29728	558.901	13.2966	17.2784	528.226	15.7539	22.1083
13C_ROV7-1_Grain_151 B	13C_ROV7-1_Grain_137	9.32061	5921.23	169.812	0.461937	-101.859	-5.34254	125.988	1.41007	0.0793522	3.03332	0.237609	3.60392	0.0903592	2.71129	0.00877353	1.26749	0.000954492	0.00427218	3.11907	1636.17	85.2877	85.2877	56.2837	1.42039	1.92983	86.3288	4.52212	4.96477	86.0417	5.35689	5.92948
13C_ROV7-1_Grain_138 A	13C_ROV7-1_Grain_137	6.06673	4749.41	138.182	0.510868	-72.9805	-6.2344	127.391	1.61626	0.0863829	4.14003	0.274694	4.76714	0.0919561	3.70694	0.00891362	1.46228	0.155917	0.00405237	4.62977	1755.93	102.035	102.035	57.1686	1.66446	2.12868	86.0482	6.07283	6.39771	81.4954	7.52747	7.90281
13C_ROV7-1_Grain_138 B	13C_ROV7-1_Grain_137	7.54459	6715.77	176.078	0.813434	-105.633	-5.60987	112.289	1.23636	0.102408	3.28241	0.39938	2.9971	0.133223	3.60073	0.00969322	1.20975	0.358896	0.00456475	2.95748	1876.4	94.4882	94.4882	62.1551	1.49617	2.0778	122.355	8.09094	8.54901	91.9261	5.41808	6.05877
13C_ROV7-1_Grain_138 C	13C_ROV7-1_Grain_137	0.264876	8194.87	239.935	0.153663	-140.437	-5.14825	124.95	1.0574	0.0528714	2.8205	0.0602093	6.18617	0.0597272	2.6296	0.00849358	1.01219	0.0356791	0.00319997	5.86415	1163.96	75.9748	75.9748	54.5699	1.10551	1.68624	58.2971	3.0068	3.31882	64.328	7.54881	7.78556
13C_ROV7-1_Grain_139 A	13C_ROV7-1_Grain_137	2.65009	4678.52	128.658	0.249165	-86.6245	-5.22702	129.066	1.61747	0.0541826	4.59984	0.0978077	11.035	0.0602085	3.84268	0.00888182	1.3494	0.497351	0.00293701	6.60572	1385.99	96.6725	96.6725	56.9712	1.53078	2.02294	57.6932	4.38348	4.60209	59.0117	7.8039	7.99741
13C_ROV7-1_Grain_139 B	13C_ROV7-1_Grain_137	2.49996	14562.9	423.726	0.410085	-256.518	-5.24993	122.043	0.877485	0.0474109	1.90092	0.132888	2.61243	0.0551991	1.83833	0.00855073	0.888938	0.14536	0.00272577	2.37655	784.08	55.7453	55.7453	54.8744	0.971302	1.60188	54.4598	1.94602	2.34064	54.9893	2.61083	3.07579
13C_ROV7-1_Grain_139 C	13C_ROV7-1_Grain_137	17.2474	5652.41	159.625	0.265417	-92.3602	-5.76668	124.113	1.402	0.0472075	3.82075	0.095337	6.52582	0.0554112	3.59433	0.00889621	1.22352	0.0655558	0.00280366	5.97132	1270.12	88.2781	88.2781	57.0688	1.39073	1.92094	53.7208	3.8251	4.0424	56.3915	6.74149	6.94551
13C_ROV7-1_Grain_140 A	13C_ROV7-1_Grain_137	4.11074	11976.1	350.259	0.332525	-207.717	-5.05899	123.313	1.02117	0.0497547	2.15336	0.108547	3.27132	0.056625	1.98755	0.00858193	1.00728	0.0834188	0.00267221	3.05523	910.729	62.7433	62.7433	55.07	1.1044	1.68919	55.5243	2.1551	2.53362	53.8922	3.28996	3.65571
13C_ROV7-1_Grain_140 B	13C_ROV7-1_Grain_137	11.2586	16197.7	478.258	0.418902	-281.584	-5.27317	122.554	0.902384	0.0490028	1.83852	0.141616	2.34662	0.0569943	1.72308	0.00848247	0.887679	0.134629	0.00283598	2.09363	827.945	56.1932	56.1932	54.4383	0.962204	1.58827	56.1974	1.88124	2.31051	57.3663	2.40977	2.95118
13C_ROV7-1_Grain_140 C	13C_ROV7-1_Grain_137	2.56336	16146.8	457.659	0.444164	-256.181	-5.34471	118.063	0.906357	0.0481843	1.92545	0.14465	2.33373	0.057791	1.76648	0.00884795	0.911978	0.0919171	0.00283523	2.11209	835.635	62.2508	62.2508	56.7722	1.03089	1.6731	56.717	1.95119	2.37675	57.2	2.41295	2.94649
13C_ROV7-1_Grain_141 A	13C_ROV7-1_Grain_137	8.09673	8968.53	250.342	0.458297	-154.771	-5.24939	122.451	1.19982	0.0954703	2.50793	0.251514	2.91497	0.112879	2.36807	0.00879671	1.14829	0.205867	0.00486623	2.78976	1718.24	74.3328	74.3328	56.4366	1.29031	1.8387	107.104	4.87474	5.49179	98.3141	5.48769	6.21224
13C_ROV7-1_Grain_141 B	13C_ROV7-1_Grain_137	6.27834	8116.58	235.404	0.486677	-131.627	-5.64287	126.861	1.2629	0.0460257	3.25721	0.158678	4.441	0.0514761	2.93345	0.00860448	1.12338	0.0939531	0.00258997	3.07451	1056.54	78.6794	78.6794	55.21	1.23489	1.77967	50.4087	2.91649	3.16197	52.2366	3.2093	3.56185
13C_ROV7-1_Grain_141 C	13C_ROV7-1_Grain_137	20.8561	4667.18	131.07	0.261503	-71.5122	-5.86922	130.105	1.57497	0.0558538	4.9711	0.234199	64.4679	0.0580986	3.96633	0.00871489	1.36314	0.00461871	0.0026844	7.51218	1399.11	96.6848	96.6848	55.905	1.51743	1.99668	55.6807	4.36765	4.5724	53.8991	8.10913	8.26504
13C_ROV7-1_Grain_153 A	13C_ROV7-1_Grain_137	28.1657	4550.84	118.599	0.305172	-82.7581	-8.35385	133.432	1.89191	0.0569829	4.9128	0.120985	7.93271	0.0638899	6.8579	0.00924582	3.08853	0.323897	0.00277098	6.03664	1500.41	104.652	104.652	59.1582	3.48809	3.7283	56.113	4.65167	4.72573	56.15	6.78186	6.98274
13C_ROV7-1_Grain_153 B	13C_ROV7-1_Grain_137	5.863	4866.52	132.458	0.374125	-85.2448	-5.38266	129.786	1.71804	0.0568649	3.99414	0.163081	5.63955	0.0660953	3.77689	0.00893162	1.45616	0.0257486	0.00312816	4.90376	1493.96	96.3798	96.3798	57.2838	1.6607	2.12734	63.5968	4.74058	4.98511	62.9627	6.17474	6.44989
13C_ROV7-1_Grain_171 A	13C_ROV7-1_Grain_137	-0.362265	7958.71	210.325	0.168063	-139.154	-5.11563	117.778	1.20575	0.0483882	2.88856	0.0580766	6.60396	0.0599624	2.77413	0.00914066	1.1316	0.155818	0.0028089	6.33476	1069.7	72.0696	72.0696	58.6331	1.32098	1.89656	58.2619	3.15919	3.45517	56.4715	7.16239	7.3553
13C_ROV7-1_Grain_171 B	13C_ROV7-1_Grain_137	19.691	5367.97	147.674	0.295745	-92.3495	-5.48739	127.141	1.58259	0.0581519	4.88731	0.265093	43.945	0.0612265	3.66314	0.00891451	1.35482	-0.0342979	0.00309075	5.97771	1367.66	92.1136	92.1136	57.1796	1.5426	2.03506	58.776	4.23616	4.46809	62.1347	7.42885	7.6532
13C_ROV7-1_Grain_171 C	13C_ROV7-1_Grain_137	31.4622	4419.15	116.631	0.231435	-68.1236	-5.71058	124.735	1.59644	0.0518396	4.34442	0.0895745	8.86814	0.0607246	3.97623	0.00905122	1.38478	0.0505487	0.00286585	7.64188	1494.03	101.647	101.647	58.0506	1.60052	2.09217	58.0419	4.56862	4.78176	57.5049	8.81032	8.97406
13C_ROV7-1_Grain_170	13C_ROV7-1_Grain_137	3.24612	5629.36	149.33	0.348791	-85.7798	-5.62168	121.211	1.36733	0.0516987	3.99823	0.151617	18.85	0.0594424	3.52136	0.0090395	1.26857	-0.0189725	0.00299523	4.93752	1270.96	87.8589	87.8589	57.9814	1.46413	1.98846	57.2647	3.9636	4.19793	60.2962	5.95065	6.21228
13C_ROV7-1_Grain_154 A	13C_ROV7-1_Grain_137	14.9479	5062.1	144.592	0.558182	-84.9518	-5.44244	128.305	1.43695	0.0562464	4.62635	0.192405	4.4296	0.0592217	3.54443	0.00854303	1.29372	0.0938775	0.00262848	3.95151	1336.69	87.4646	87.4646	54.811	1.4124	1.90124	57.0463	3.9856	4.21827	52.9821	4.18501	4.46897
13C_ROV7-1_Grain_154 B	13C_ROV7-1_Grain_137	9.62025	6430.06	181.077	0.608517	-106.14	-5.35664	125.014	1.21856	0.0513894	3.28271	0.224128	3.45848	0.0592792	3.11024	0.00867015	1.21032	0.176896	0.00293981	2.87571	1280.92	81.3121	81.3121	55.626	1.34036	1.86099	57.8441	3.546	3.81265	59.2826	3.40606	3.83075
13C_ROV7-1_Grain_154 C	13C_ROV7-1_Grain_137	17.0298	6417.56	165.631	0.417858	-109.424	-5.31421	109.233	1.3255	0.13024	2.74499	0.345137	3.13099	0.172431	2.64592	0.0100369	1.24374	0.17238	0.00811579	2.78436	2111.05	81.7996	81.7996	64.3452	1.59273	2.18301	156.278	7.74429	8.53852	163.02	9.04942	10.2486
13C_ROV7-1_Grain_155 A	13C_ROV7-1_Grain_137	32.1497	3640.82	104.721	0.223397	-62.1767	-5.58629	136.167	2.13173	0.0586707	5.39665	0.0983804	10.5338	0.0645781	4.58266	0.00899992	1.59207	0.0730516	0.00317597	8.41132	1632.42	108.429	108.429	57.7121	1.82964	2.26771	60.83	5.5816	5.77872	63.5902	10.7386	10.9036
13C_ROV7-1_Grain_155 B	13C_ROV7-1_Grain_137	2.59926	6578.44	184.98	0.285137	-110.215	-7.32509	122.626	1.47752	0.0810973	2.97873	0.178446	4.14912	0.0939687	2.62769	0.00915749	1.29618	0.793483	0.00481398	3.72932	1510.07	81.2531	81.2531	58.7331	1.51544	2.0382	89.4235	4.50379	4.97181	96.8421	7.21151	7.75874
13C_ROV7-1_Grain_150	13C_ROV7-1_Grain_137	24.8891	5640.85	161.84	0.285982	-90.4565	-5.56321	123.02	1.38317	0.0495533	3.77526	0.119274	6.06028	0.0570732	3.37734	0.00892016	1.27838	0.046663	0.00296176	5.4102	1315.84	89.6875	89.6875	57.2193	1.45644	1.97111	55.615	3.72303	3.96174	59.5946	6.45109	6.68816
13C_ROV7-1_Grain_149	13C_ROV7-1_Grain_137	-3.79013	6535.48	190.142	0.133841	-102.063	-5.54653	123.102	1.21345	0.0568892	3.74461	0.0455424	9.0669	0.0629174	3.07777	0.00874387	1.17506	-0.00531087	0.00242059	9.17077	1280.08	83.1699	83.1699	56.0981	1.31255	1.84891	60.8001	3.64173	3.92118	48.5199	8.93589	9.05153
13C_ROV7-1_Grain_142 A	13C_ROV7-1_Grain_137	3.33689	7320.19	213.896	0.340287	-117.764	-5.68447	121.907	1.18779	0.0476201	3.19847	0.220254	53.8607	0.0550874	2.96324	0.00882019	1.16996	0.111977	0.00243136	4.52576	1151.89	78.3413	78.3413	56.5857	1.31826	1.86098	53.7834	3.14154	3.40087	48.9983	4.4332	4.66426
13C_ROV7-1_Grain_142 B	13C_ROV7-1_Grain_137	8.58472	6981.55	205.706	0.345939	-105.324	-6.0089	127.256	1.34802	0.0673501	3.13098	0.161074	4.37708	0.0761142	2.82759	0.00864767	1.18593	0.125855	0.00347898	4.16903	1478.24	79.0051	79.0051	55.4834	1.31038	1.83749	73.5376	4.09534	4.46525	70.0478	5.84093	6.19813
13C_ROV7-1_Grain_143 A	13C_ROV7-1_Grain_137	-1.3349	5069.23	141.125	0.279605	-80.4074	-5.54944	125.496	1.4959	0.0471237	4.38182	0.101865	7.26941	0.0557567	4.00512	0.00894378	1.35588	0.108504	0.00238925	8.19587	1293.08	82.3738	82.3738	57.3663	1.54839	2.04203	53.9943	4.32767	4.52673	47.9644	7.8838	8.01134
13C_ROV7-1_Grain_143 B	13C_ROV7-1_Grain_137	13.6902	11658.6	333.695	0.625859	-171.747	-5.65501	120.431	1.00932	0.0785753	3.14865	0.302401	8.64137	0.0941828	3.58224	0.008787	1.05173	0.0263879	0.00387543	2.3472	1321.07	66.4575	66.4575	56.3782	1.18015	1.7618	87.6585	3.81274	4.03076	78.1215	3.65733	4.32379
13C_ROV7-1_Grain_144 A	13C_ROV7-1_Grain_137	8.60202	10228.7	287.278	0.767045	-153.598	-5.52301	119.403	1.00286	0.0623073	2.41115	0.302354	2.24136	0.0734985	2.21289	0.00877629	0.979897	0.0915814	0.00337446	1.97616	1209.26	70.2006	70.2006	56.3123	1.09857	1.70734	71.5694	3.09062	3.53505	68.0593	2.68532	3.35504
13C_ROV7-1_Grain_144 B	common lead	14.5174	12301.2	306.246	0.7859	-188.356	-5.54639	106.355	0.979174	0.141664	2.32605	0.482286	2.0304	0.198419	2.47071	0.0098439	0.960097	0.396505	0.00619431	2.06606	2161.32	79.4983	79.4983	63.2052	1.21504	1.91126	179.356	8.23299	9.19479	124.7	5.13588	6.31785
13C_ROV7-1_Grain_145 A	13C_ROV7-1_Grain_137	4.78095	9471.77	270.88	0.749201	-152.809	-5.62107	121.848	1.1027	0.0488263	2.76387	0.257135	2.57825	0.056425	2.57635	0.00876042	1.06285	0.0473719	0.00286347	2.16447	1027.16	71.8405	71.8405	56.2081	1.18955	1.76563	55.5648	2.84034	3.1468	57.7674	2.49771	3.02588
13C_ROV7-1_Grain_145 B	13C_ROV7-1_Grain_137	1.97231	10782.1	304.386	0.793601	-192.871	-5.14102	119.442	1.03073	0.0499206	2.38033	0.271388	2.25954	0.0590594	2.23834	0.00887977	0.99784	0.0753075	0.00293076	1.99278	996.139	63.654	63.654	56.9726	1.13196	1.74077	57.7137	2.52035	2.87508	59.1265	2.35354	2.93173
13C_ROV7-1_Grain_146	13C_ROV7-1_Grain_137	4.94637	5299.92	145.349	0.205711	-88.3377	-5.31691	123.243	1.44002	0.0497907	3.80827	0.0773702	8.08964	0.0578132	3.52682	0.00903397	1.32999	0.0420458	0.00266442	7.6965	1240.28	86.2033	86.2033	57.9432	1.53426	2.04023	55.9803	3.91342	4.1441	53.4864	8.2559	8.40718
13C_ROV7-1_Grain_148	13C_ROV7-1_Grain_137	14.847	4891.46	136.861	0.250951	-79.4559	-5.48768	121.108	1.49365	0.0565469	6.57587	0.0974209	8.88693	0.0602074	4.19188	0.00929829	1.41793	0.083377	0.00304262	7.34775	1347.24	100.241	100.241	59.6252	1.68201	2.17753	57.4558	4.64647	4.84194	61.0548	8.97342	9.15367
13C_ROV7-1_Grain_156	13C_ROV7-1_Grain_137	2.04493	6406.99	180.999	0.254092	-102.079	-5.3656	118.977	1.33005	0.0472565	3.51749	0.0861594	5.91979	0.0581559	3.37527	0.00925555	1.23857	0.0785341	0.002719	5.60603	1204.09	82.869	82.869	59.3615	1.46363	2.01	56.1844	3.73685	3.97674	54.7188	6.13886	6.34922
13C_ROV7-1_Grain_161	13C_ROV7-1_Grain_137	16.5993	4884.57	146.002	0.334799	-86.1216	-5.10127	130.182	1.60586	0.050254	4.17001	0.117135	6.25244	0.0543868	3.92792	0.00879785	1.45586	0.0498704	0.0022354	6.44002	1330.02	95.2578	95.2578	56.4301	1.63566	2.09544	52.8331	4.10949	4.30585	45.371	5.84431	5.99669
13C_ROV7-1_Grain_162	13C_ROV7-1_Grain_137	-4.81772	8138.11	250.484	0.529503	-128.488	-5.49805	127.763	1.27779	0.0501268	2.87052	0.180244	3.23648	0.0568064	2.70386	0.00845688	1.14971	0.0467986	0.00271934	2.79163	1117.74	75.7613	75.7613	54.3431	1.25117	1.78185	55.356	2.93347	3.22213	54.8488	3.05889	3.46226
13C_ROV7-1_Grain_163	13C_ROV7-1_Grain_137	10.3439	4916.76	149.864	0.237311	-84.2244	-5.39776	134.494	1.69907	0.0535079	4.2523	0.0928971	10.5546	0.0563714	3.75812	0.00856801	1.44077	0.0732633	0.00269337	7.64963	1381.26	91.1625	91.1625	54.9638	1.57713	2.02876	54.5062	4.0666	4.27841	54.0674	8.29154	8.44532
13C_ROV7-1_Grain_160	13C_ROV7-1_Grain_137	5.42384	9797.14	301.355	0.1254	-166.06	-4.93788	124.675	1.03344	0.0505402	2.49733	0.0444911	7.10722	0.0571333	2.32986	0.00849478	1.04129	0.637264	0.00268256	6.64644	1000.2	68.8828	68.8828	54.5122	1.13033	1.69679	55.855	2.54192	2.87373	53.9242	7.1761	7.35189
13C_ROV7-1_Grain_157	13C_ROV7-1_Grain_137	17.5423	9896.97	307.472	0.533378	-169.926	-5.20525	125.118	1.05418	0.0500102	2.80366	0.183255	3.04403	0.0567469	2.6934	0.00847599	1.01006	0.0941688	0.00250188	2.84007	1067.15	67.7978	67.7978	54.3932	1.0942	1.67099	55.1027	2.88544	3.17147	50.4697	2.86473	3.23043
13C_ROV7-1_Grain_159	13C_ROV7-1_Grain_137	-1.55419	7120.22	207.728	0.301159	-116.742	-5.21966	123.159	1.28696	0.0580464	2.77529	0.132437	4.34788	0.067003	2.5817	0.00884149	1.21556	0.167407	0.00348227	3.69945	1170.44	71.3831	71.3831	56.8027	1.38161	1.91432	65.2921	3.31515	3.67142	70.1456	5.18589	5.58557
13C_ROV7-1_Grain_147	13C_ROV7-1_Grain_137	0.856512	7490.7	220.696	0.199379	-106.488	-5.71105	123.804	1.14135	0.0482537	3.06541	0.0746489	5.90207	0.0558498	2.93489	0.0086401	1.13273	0.0368649	0.00301545	5.29858	1146.01	77.1002	77.1002	55.4371	1.25029	1.79417	54.3331	3.12189	3.38442	60.6773	6.43079	6.67699
13C_ROV7-1_Grain_158	13C_ROV7-1_Grain_137	8.21624	7591.72	211.354	0.166692	-117.415	-5.39761	116.54	1.23697	0.0584085	2.95103	0.0930334	6.16082	0.0722764	2.81432	0.00927586	1.17585	0.203619	0.00392368	5.69068	1279.83	80.8176	80.8176	59.494	1.39252	1.96093	69.6023	3.79553	4.14148	78.8017	8.97235	9.27088
13C_ROV7-1_Grain_165	13C_ROV7-1_Grain_137	25.7306	4561.49	129.523	0.503844	-70.1401	-5.50012	125.181	1.52081	0.050029	4.26537	0.177513	4.72398	0.0564303	4.02522	0.00889198	1.38279	0.00927373	0.00274657	4.17258	1405.14	94.5009	94.5009	57.0345	1.5703	2.0539	54.1215	4.31438	4.51089	55.3457	4.61679	4.89866
13C_ROV7-1_Grain_164	13C_ROV7-1_Grain_137	4.54707	7690.98	215.599	0.571975	-125.639	-5.42453	120.141	1.37237	0.111459	2.20226	0.361887	2.92928	0.13227	1.99342	0.00915799	1.23699	0.309212	0.00521127	2.25826	1797.78	67.9228	67.9228	58.739	1.44625	1.98732	124.792	4.7485	5.57803	104.961	4.72748	5.65244
13C_ROV7-1_Grain_94	13C_ROV7-1_Grain_137	-11.4671	5172.77	156.086	0.273166	-84.9145	-6.34939	134.81	1.58841	0.0570851	6.93755	0.262484	49.6211	0.0557236	4.14683	0.00842768	1.37467	0.00465502	0.00321493	7.72322	1337.1	91.5559	91.5559	54.0709	1.48014	1.94073	52.6859	3.81446	3.97837	64.4594	9.71755	9.8944
13C_ROV7-1_Grain_95	13C_ROV7-1_Grain_137	-5.91231	9365.13	273.571	0.295039	-131.401	-5.54762	123.973	1.14298	0.0512264	2.58085	0.103778	4.17955	0.0586446	2.45121	0.00862515	1.07102	0.0900218	0.00283904	3.64238	1069.49	69.7252	69.7252	55.3439	1.18039	1.74475	57.2154	2.73755	3.0622	57.2268	4.16482	4.49557
13C_ROV7-1_Grain_124	13C_ROV7-1_Grain_137	9.75768	14609.9	369.726	1.0678	-223.062	-5.45929	100.748	0.952538	0.132409	1.82438	0.554874	1.52596	0.187561	1.78906	0.0103921	0.935833	0.215668	0.00532598	1.38646	2064.97	64.0589	64.0589	66.6253	1.24059	1.98177	172.026	5.75137	6.97707	107.326	2.96825	4.3419
13C_ROV7-1_Grain_123 core	13C_ROV7-1_Grain_137	1.35004	85623.1	428.668	0.807461	-1315.09	-5.6964	20.5021	0.661938	0.053486	0.900173	0.243475	1.05939	0.364388	0.82978	0.0496316	0.637368	0.274192	0.0152615	0.890018	509.116	30.9571	30.9571	312.375	3.91646	8.16416	314.466	4.52873	8.09162	306.043	5.40496	10.4885
13C_ROV7-1_Grain_123 rim	13C_ROV7-1_Grain_137	12.196	8077.41	234.001	0.154253	-115.516	-5.63646	120.428	1.18292	0.0501965	2.95574	0.0936269	48.2091	0.0590489	2.76669	0.00896901	1.14268	-0.00689614	0.0027012	7.08932	1205.19	80.9945	80.9945	57.5369	1.30869	1.86958	57.4154	3.10953	3.40236	54.2659	7.70347	7.86958
13C_ROV7-1_Grain_122 core	common lead	10.0536	23782.2	183.134	0.663114	-310.002	-6.43531	31.3762	0.885259	0.0590729	1.60786	0.202155	1.80112	0.263185	1.51434	0.0330193	0.890068	0.124161	0.00985229	1.53157	869.95	54.1238	54.1238	209.269	3.6634	6.03684	234.862	6.3793	8.21484	198.034	6.03678	8.39518
13C_ROV7-1_Grain_122 rim	13C_ROV7-1_Grain_137	-4.68142	5141.25	154.783	0.125613	-76.4249	-5.35687	127.392	1.39278	0.0494264	3.9022	0.0373796	15.0254	0.0555292	3.59892	0.00873878	1.30664	-0.00208156	0.00226884	13.5756	1301.17	90.7492	90.7492	56.0601	1.45846	1.95457	53.6108	3.81239	4.02844	45.1396	12.3795	12.4529
13C_ROV7-1_Grain_121 core	13C_ROV7-1_Grain_137	0.725624	140941	820.027	0.691009	-2015.75	-6.80239	23.6529	0.654826	0.0549461	0.804919	0.213492	0.922584	0.326585	0.83728	0.042993	0.675974	0.450067	0.0135644	0.814044	475.112	30.863	30.863	271.252	3.58833	7.1535	286.047	4.16299	7.39232	272.273	4.40334	9.13739
13C_ROV7-1_Grain_173 rim	start of signal	-2.72045	15589	174.228	0.282283	-200.966	-10.9966	41.1889	2.00842	0.0544702	3.69028	0.131664	5.13145	0.186212	3.54174	0.0255391	1.97324	0.163886	0.0112397	4.59057	882.496	109.27	109.27	163.19	6.48999	7.53803	170.614	11.2006	11.8554	225.442	20.5722	21.6151
13C_ROV7-1_Grain_120	13C_ROV7-1_Grain_137	31.8244	3569.41	108.481	0.201065	-52.383	-5.85064	139.311	2.02028	0.0537407	5.28335	0.08748	13.7106	0.0588001	4.46589	0.00863106	1.54714	0.076694	0.00270677	10.4722	1563.56	109.14	109.14	55.361	1.70585	2.13591	56.1438	5.01275	5.19899	54.7663	11.4735	11.5876
13C_ROV7-1_Grain_119	13C_ROV7-1_Grain_137	-20.1109	3739.39	115.826	0.194749	-64.5905	-7.23758	135.549	2.59566	0.0517179	7.28917	0.0797871	18.6181	0.0545406	6.37926	0.00887166	2.26148	0.0114659	0.00268922	12.9816	1509.74	141.433	141.433	56.8907	2.5621	2.88249	52.4141	6.70602	6.82927	53.8263	14.05	14.141
13C_ROV7-1_Grain_118 core	13C_ROV7-1_Grain_137	0.0902646	257795	173.059	0.288377	-4129.93	-5.83523	2.50871	0.715865	0.16258	0.539451	0.132369	2.51843	9.13048	0.633559	0.409355	0.695111	0.676049	0.129657	0.842823	2466.52	17.9914	17.9914	2204.4	26.1078	50.9793	2345.04	11.8388	25.8327	2460.02	39.2618	79.346
13C_ROV7-1_Grain_118 rim	13C_ROV7-1_Grain_137	9.34024	7094.5	226.691	0.108487	-107.179	-5.3087	136.659	1.23098	0.0530706	2.9616	0.0530039	8.04662	0.0540939	2.7608	0.00790048	1.14785	0.0180965	0.00318209	7.5393	1239.62	75.4633	75.4633	50.7114	1.15978	1.65303	53.1422	2.90136	3.17571	64.4043	9.71642	9.9019
13C_ROV7-1_Grain_117 core	13C_ROV7-1_Grain_137	-3.89551	22582.4	140.153	0.275222	-355.503	-4.98807	25.9225	0.832253	0.0507139	1.51814	0.0904432	2.4513	0.277326	1.43456	0.0401225	0.825226	0.185733	0.0128778	2.25893	731.493	49.2812	49.2812	253.361	4.09554	7.08855	245.422	6.3064	8.30319	258.037	11.5893	13.8555
13C_ROV7-1_Grain_117 rim	13C_ROV7-1_Grain_137	-11.9048	6965.94	196.267	0.174284	-99.6125	-5.59809	124.878	1.28425	0.0479019	3.31038	0.0649337	6.88531	0.0552173	3.04717	0.00870637	1.18703	0.080052	0.00308163	6.23003	1192.9	86.9137	86.9137	55.8582	1.3205	1.85083	53.6802	3.20785	3.4588	61.9319	7.72362	7.93861
13C_ROV7-1_Grain_116	13C_ROV7-1_Grain_137	4.4897	8226.65	224.775	0.154874	-124.392	-5.3625	123.671	1.23516	0.053916	3.10394	0.0591655	6.72299	0.0595571	2.66842	0.00876474	1.1777	0.0041736	0.00310086	5.69633	1150.19	81.1881	81.1881	56.2313	1.31864	1.85543	57.954	3.00734	3.31082	62.359	7.10996	7.34606
13C_ROV7-1_Grain_115	13C_ROV7-1_Grain_137	15.5958	3596.74	83.43	0.286926	-51.0249	-5.68753	132.572	1.93078	0.0530748	5.66834	0.119745	10.766	0.0566814	5.11445	0.00900122	1.56181	-0.0135158	0.00274346	7.66679	1623.73	104.595	104.595	57.7222	1.79462	2.23944	53.3448	5.50226	5.6588	55.0641	8.46387	8.62016
13C_ROV7-1_Grain_114	13C_ROV7-1_Grain_137	16.5183	7177.01	166.615	0.195229	-92.1389	-5.80018	119.995	1.17119	0.0492483	3.11257	0.0668912	6.69991	0.057179	2.91292	0.00894261	1.15948	0.020482	0.00270395	6.11978	1152.04	76.9222	76.9222	57.3676	1.32441	1.87809	55.9466	3.21856	3.49316	54.3861	6.66331	6.85543
13C_ROV7-1_Grain_113	13C_ROV7-1_Grain_137	-6.91197	9475.72	155.911	0.447862	-145.97	-5.28995	85.832	1.26531	0.0978246	2.01437	0.165085	3.30208	0.166729	1.94578	0.0126257	1.15475	0.292889	0.00442413	2.81275	1668.07	62.7717	62.7717	80.8341	1.8555	2.63664	154.472	5.6865	6.72528	89.1156	5.0049	5.65557
13C_ROV7-1_Grain_112	13C_ROV7-1_Grain_137	7.49328	5027.41	129.746	0.347065	-70.6429	-5.78344	140.174	1.75194	0.0512321	4.31525	0.142497	8.59165	0.0533871	3.93754	0.00826335	1.43531	0.0436121	0.00268156	5.23985	1396.19	91.4393	91.4393	53.0188	1.51554	1.95246	51.6414	4.04706	4.23951	53.011	5.49239	5.70732
13C_ROV7-1_Grain_108	13C_ROV7-1_Grain_137	12.1487	4943.31	117.127	0.190627	-78.1867	-5.33664	124.416	1.52201	0.0492521	4.4147	0.0758724	8.12769	0.0555958	3.98642	0.00892523	1.36452	-0.0704755	0.00295025	7.665	1420.59	99.9181	99.9181	57.2498	1.55572	2.04618	53.7393	4.25645	4.45402	59.2083	9.09684	9.2649
13C_ROV7-1_Grain_109	13C_ROV7-1_Grain_137	12.4949	5996.68	154.855	0.19363	-84.8254	-5.56162	132.083	1.42402	0.0502162	3.4568	0.0813864	6.49935	0.055029	3.35597	0.00838979	1.26759	0.0701964	0.00305028	5.92703	1293.75	83.4297	83.4297	53.8333	1.35915	1.84656	53.7245	3.55908	3.7901	61.329	7.27594	7.49938
13C_ROV7-1_Grain_110	13C_ROV7-1_Grain_137	0.102253	123750	203.655	0.160819	-1806.31	-5.34599	8.55556	1.84607	0.106148	0.668233	0.0596929	3.62936	2.00808	1.44327	0.135124	1.30055	0.900649	0.0373917	2.61636	1714.84	23.9312	23.9312	811.56	20.1658	27.0816	1079.76	22.0606	28.9716	735.716	38.0509	43.718
13C_ROV7-1_Grain_111	13C_ROV7-1_Grain_137	-6.31635	3632.98	93.92	0.26234	-51.2653	-5.77632	139.906	2.2157	0.0610713	5.88575	0.105953	11.6789	0.0582438	4.73967	0.00872504	1.59532	0.00592902	0.0028252	7.9093	1633.19	107.995	107.995	55.9583	1.7782	2.20239	55.7079	5.29416	5.46915	56.6724	8.98828	9.14431
13C_ROV7-1_Grain_103 rim	13C_ROV7-1_Grain_137	-5.72005	4642.68	124.004	0.227634	-69.6379	-5.29959	133.695	1.65106	0.0515746	4.2229	0.0829092	8.93955	0.0565142	3.88177	0.0086326	1.46363	0.085936	0.0025821	7.88701	1390.73	94.2693	94.2693	55.375	1.61404	2.06346	54.5416	4.19912	4.40444	51.8307	8.19531	8.33838
13C_ROV7-1_Grain_103 core	13C_ROV7-1_Grain_137	0.219129	57681.1	397.865	0.277172	-865.911	-4.95031	30.4706	0.722293	0.0972594	0.822657	0.0944205	1.85753	0.450265	0.819604	0.0336487	0.720127	0.4203	0.0110369	1.46853	1531.94	31.4859	31.4859	213.219	3.0199	5.74632	375.136	5.16721	9.31137	221.675	6.47247	9.18973
13C_ROV7-1_Grain_102 core	13C_ROV7-1_Grain_137	0.229225	75880.6	272.134	0.6146	-1056.01	-5.22712	15.3472	0.688942	0.0573742	0.9047	0.199777	1.06143	0.525504	0.898682	0.0664383	0.699856	0.374694	0.0218847	0.919396	638.937	31.2877	31.2877	414.229	5.60945	10.8984	426.485	6.33432	10.7295	437.29	7.95287	15.0723
13C_ROV7-1_Grain_102 rim	13C_ROV7-1_Grain_137	24.8596	3660.1	102.437	0.175373	-53.0088	-5.66071	139.664	2.063	0.0547178	5.67918	0.0673191	14.7808	0.055562	4.81482	0.00865314	1.60042	0.0342267	0.00245078	12.4169	1596	114.456	114.456	55.4991	1.76881	2.18833	52.6682	5.06117	5.22335	48.8237	12.2376	12.3243
13C_ROV7-1_Grain_101 core	13C_ROV7-1_Grain_137	0.627278	95680.5	98.6303	0.630824	-1411.36	-5.03931	4.26614	0.724262	0.115764	0.649985	0.193248	1.63231	3.82602	0.734038	0.240036	0.711537	0.604561	0.0748519	0.999416	1861.66	24.2126	24.2126	1383.74	17.7817	34.1316	1592.2	12.0846	23.5627	1455.57	27.9392	49.9274
13C_ROV7-1_Grain_101 rim	13C_ROV7-1_Grain_137	10.1238	4714.8	132.218	0.215967	-65.053	-5.58935	128.812	1.68581	0.0508817	4.31206	0.0863461	10.4456	0.0553695	3.87243	0.00881481	1.3491	0.0110646	0.00295643	7.6133	1468.85	95.1695	95.1695	56.5435	1.51929	2.00793	53.2649	4.09341	4.29451	59.3115	9.05425	9.22378
13C_ROV7-1_Grain_100	13C_ROV7-1_Grain_137	16.4047	3620.05	100.605	0.231949	-54.2931	-5.3108	130.557	2.13897	0.0489748	5.51265	0.0968154	10.8416	0.0566127	4.81254	0.00927355	1.50097	0.0212638	0.00296098	8.98795	1553.58	108.794	108.794	59.4627	1.77702	2.25005	53.5856	5.17217	5.33806	59.9132	10.7722	10.9173
13C_ROV7-1_Grain_99	13C_ROV7-1_Grain_137	14.5574	5563.56	169.398	0.326772	-69.4922	-7.86965	124.624	2.1157	0.0527668	5.61907	0.143593	11.1152	0.0586168	4.8686	0.0089936	1.81662	0.0982535	0.00302043	6.96965	1281.24	115.937	115.937	57.685	2.08654	2.47924	56.4483	5.41259	5.58229	60.7875	8.46931	8.65819
13C_ROV7-1_Grain_98	13C_ROV7-1_Grain_137	-19.7228	4089.23	124.878	0.301641	-51.2284	-5.90405	139.589	2.13684	0.0557785	4.56897	0.119251	9.90915	0.0592256	4.11105	0.00868237	1.56348	0.0702542	0.0025415	7.08968	1486.67	94.4852	94.4852	55.6877	1.73393	2.16289	57.0962	4.68201	4.88663	51.0757	7.25733	7.41381
13C_ROV7-1_Grain_97	13C_ROV7-1_Grain_137	7.89134	3444.79	110.72	0.194587	-48.5385	-5.75256	146.758	2.05378	0.0605996	6.00199	0.112686	12.2644	0.0575007	5.2284	0.0081403	1.62285	0.0125353	0.00303791	9.23392	1743.85	114.648	114.648	52.2271	1.68834	2.07881	54.4719	5.71131	5.86688	61.5421	11.3726	11.5178
13C_ROV7-1_Grain_96	13C_ROV7-1_Grain_137	15.2408	5039.99	111.569	0.313778	-70.5604	-5.41494	99.3223	1.70031	0.0657882	3.69641	0.10774	6.52693	0.0988927	3.41545	0.0115895	1.4702	0.171189	0.00349134	5.76854	1575.72	87.6773	87.6773	74.2169	2.1699	2.7693	93.1192	6.24788	6.63985	70.6502	8.15494	8.41911
13C_ROV7-1_Grain_93	13C_ROV7-1_Grain_137	0.0605509	57661	198.497	0.648946	-743.749	-5.50064	14.6302	1.41322	0.0747556	0.903141	0.382079	1.05374	0.75879	1.24206	0.0737507	1.09811	0.73843	0.0442211	1.07234	1052.95	33.8698	33.8698	457.39	9.78153	14.2657	564.262	11.2201	15.7818	873.112	18.4038	31.3688
13C_ROV7-1_Grain_92	13C_ROV7-1_Grain_137	-14.7068	4212.64	120.031	0.453499	-60.7416	-5.29123	126.12	1.80629	0.045388	5.19586	0.157801	5.9758	0.0535234	4.77205	0.00912668	1.41455	0.0325195	0.00281635	4.66447	1466.19	103.122	103.122	58.5306	1.64839	2.13605	51.4505	4.92732	5.08801	56.7232	5.29039	5.55035
13C_ROV7-1_Grain_91	13C_ROV7-1_Grain_137	10.4481	7862.43	251.884	0.160211	-111.688	-5.22157	133.128	1.15129	0.051256	3.1921	0.0565286	6.62309	0.0532104	2.92365	0.00805576	1.08846	-0.0405392	0.00261283	6.55302	1153.89	73.8882	73.8882	51.7057	1.12099	1.6426	51.8752	2.96793	3.21936	52.5361	6.89389	7.06756
13C_ROV7-1_Grain_90	13C_ROV7-1_Grain_137	0.184492	187775	142.208	0.433811	-2490.47	-5.27	2.99049	0.605519	0.150102	0.553786	0.11807	0.825293	6.97865	0.525918	0.338407	0.591965	0.55903	0.0966551	0.815272	2330.12	19.0621	19.0621	1873.96	19.2234	42.4591	2104.74	9.41837	23.9347	1861.23	28.9773	60.0614
13C_ROV7-1_Grain_89	13C_ROV7-1_Grain_137	-10.8225	6114.09	91.9662	0.363986	-84.461	-6.08292	63.3152	1.73203	0.0509486	4.02496	0.184713	4.59973	0.115936	3.63262	0.0176671	1.59228	0.131985	0.00789266	3.84001	1269.76	96.7999	96.7999	113.013	3.59012	4.4495	108.686	7.74107	8.17187	158.432	12.1375	13.008
13C_ROV7-1_Grain_88	13C_ROV7-1_Grain_137	-31.6718	4532.39	128.984	0.194892	-60.344	-5.68978	131.216	1.83284	0.0529482	4.62309	0.0766752	19.0406	0.0578664	4.13932	0.00889589	1.48085	0.00807644	0.00223779	10.5145	1525.85	107.984	107.984	57.0546	1.68259	2.14143	55.5803	4.56751	4.76447	45.3784	9.53633	9.63036
13C_ROV7-1_Grain_87	13C_ROV7-1_Grain_137	-2.20537	6877.22	201.997	0.197202	-95.275	-5.40708	125.542	1.36629	0.0551663	3.52775	0.0686471	7.14866	0.0600036	2.9221	0.00870802	1.23867	0.0873161	0.00274101	6.10414	1224.42	79.3491	79.3491	55.8666	1.37792	1.89223	58.2066	3.32265	3.60442	55.5332	6.77845	6.97488
13C_ROV7-1_Grain_86	13C_ROV7-1_Grain_137	-7.23071	4406.71	126.185	0.212974	-50.8045	-5.90728	131.064	1.72018	0.0510348	4.26609	0.0800627	9.13929	0.0573871	3.94655	0.00875395	1.38783	0.0868954	0.00307349	7.84222	1405.44	97.2574	97.2574	56.1533	1.55189	2.02677	55.3123	4.31882	4.52328	62.1784	9.75135	9.92352
13C_ROV7-1_Grain_85	13C_ROV7-1_Grain_137	-4.61868	4145.71	112.805	0.188094	-58.0601	-5.32129	126.654	1.84546	0.0510027	6.06543	0.0686051	11.4036	0.0569544	4.49982	0.00930068	1.49414	0.00488853	0.0023741	10.8908	1444.62	101.021	101.021	59.6361	1.77424	2.2504	54.1986	4.84257	5.01984	47.459	10.4056	10.5012
13C_ROV7-1_Grain_104	13C_ROV7-1_Grain_137	2.47193	6802.2	193.348	0.199344	-91.1842	-5.32286	123.783	1.22239	0.0502561	3.08248	0.0634291	7.04192	0.056801	2.89592	0.00877708	1.19561	0.0755226	0.00266906	6.14617	1188.98	77.6154	77.6154	56.3093	1.34018	1.87183	55.2428	3.13397	3.40437	53.6862	6.60485	6.79368
13C_ROV7-1_Grain_105	13C_ROV7-1_Grain_137	-2.52088	6127.27	166.368	0.14928	-219.114	-64.1633	122.104	1.42856	0.0490218	3.43831	0.0556581	8.57756	0.0608867	3.30966	0.00921883	1.6657	0.763854	0.00316212	7.56886	1236.41	80.9596	80.9596	59.1039	1.93467	2.36144	58.7318	3.80634	4.06015	63.4035	9.62808	9.81045
13C_ROV7-1_Grain_106	13C_ROV7-1_Grain_137	6.29529	9135.2	135.115	0.222321	-140.271	-5.8931	74.998	1.95042	0.0972896	2.4034	0.105195	7.58278	0.238125	2.97884	0.0169299	1.9714	0.837933	0.00692973	4.09809	1707.15	70.6483	70.6483	107.98	4.21201	4.89343	205.15	10.9704	11.8669	139.016	11.375	12.0942
13C_ROV7-1_Grain_107	13C_ROV7-1_Grain_137	-3.87569	9661.77	290.163	0.139685	-124.466	-5.27305	125.42	1.04616	0.0472875	2.55651	0.0471541	6.45134	0.0532868	2.327	0.00849498	1.02603	0.0546121	0.00261213	6.03089	972.409	71.1476	71.1476	54.514	1.11366	1.68564	52.223	2.38072	2.69219	52.9397	6.38639	6.57592
13C_ROV7-1_Grain_82	13C_ROV7-1_Grain_137	-4.21992	8535.22	236.638	0.556977	-118.032	-5.35576	115.818	1.17913	0.0500588	2.73891	0.220931	2.8822	0.0613099	2.59732	0.00926208	1.15138	0.0914545	0.00337733	2.85596	1070.67	73.1294	73.1294	59.4072	1.3612	1.93713	59.6225	3.03498	3.35742	68.083	3.88285	4.37333
13C_ROV7-1_Grain_83	13C_ROV7-1_Grain_137	-11.512	4373.31	123.095	0.163759	-58.5929	-5.71783	124.01	1.67471	0.0541042	4.66885	0.0587794	11.6095	0.060685	4.07199	0.00927051	1.4324	-0.0589948	0.00276083	10.4287	1573.49	103.941	103.941	59.4472	1.6952	2.18569	58.1759	4.71609	4.9261	55.1434	11.5798	11.6958
13C_ROV7-1_Grain_84	13C_ROV7-1_Grain_137	36.8757	5923.98	145.574	0.54215	-76.6485	-5.67161	105.194	1.47772	0.0481918	3.7159	0.255497	3.67552	0.0673065	3.44013	0.0105886	1.33097	0.0544887	0.00466099	3.04362	1309.68	89.69	89.69	67.8554	1.7969	2.3887	64.9745	4.41449	4.68759	93.849	5.70305	6.34167
13C_ROV7-1_Grain_80	13C_ROV7-1_Grain_137	-14.3485	3957.96	117.671	0.263226	-53.0781	-5.45463	133.327	1.89946	0.0519301	5.01789	0.105358	9.68329	0.0559366	4.20914	0.00886494	1.51595	0.0205654	0.00280892	7.12318	1565.91	107.876	107.876	56.8552	1.7165	2.16537	53.5156	4.49194	4.67939	56.4135	8.05395	8.22599
13C_ROV7-1_Grain_79	13C_ROV7-1_Grain_137	23.1016	6930.73	206.269	0.14069	-87.8764	-5.40013	121.849	1.2111	0.047075	3.44564	0.0533831	7.71863	0.0546065	3.11931	0.0089101	1.17888	0.0374429	0.00295207	7.37939	1163.4	84.9404	84.9404	57.1593	1.34163	1.88684	53.63	3.31936	3.56757	59.2461	8.76367	8.93822
13C_ROV7-1_Grain_54	13C_ROV7-1_Grain_137	9.1668	6068.41	187.918	0.187172	-78.0987	-5.35465	127.351	1.25626	0.0530007	3.37044	0.0662323	7.70665	0.0578595	3.127	0.00858598	1.22764	0.0113258	0.00271633	6.90995	1306.69	80.8201	80.8201	55.0878	1.34654	1.85695	56.0822	3.44041	3.69646	54.5801	7.55646	7.72787
13C_ROV7-1_Grain_53	13C_ROV7-1_Grain_137	-0.768829	3955.42	118.452	0.24214	-50.1026	-5.62231	133.354	1.78734	0.0572531	4.87535	0.114308	9.7788	0.0592632	4.2511	0.00878079	1.48274	-0.0177386	0.00300765	7.48427	1603.2	111.536	111.536	56.3199	1.66281	2.11522	57.5914	4.88605	5.08603	60.3436	9.05701	9.23243
13C_ROV7-1_Grain_81	13C_ROV7-1_Grain_137	4.24279	6233.1	188.055	0.311037	-79.2123	-5.56902	126.009	1.38136	0.0525475	3.42739	0.112924	5.38692	0.0584602	3.18489	0.00875442	1.31118	0.0798893	0.00283929	4.85996	1327.48	86.1356	86.1356	56.1598	1.46627	1.96203	56.6033	3.53566	3.78963	57.5165	5.59437	5.84808
13C_ROV7-1_Grain_52	13C_ROV7-1_Grain_137	17.8038	4301.62	131.585	0.220826	-54.7278	-5.62186	135.473	1.77084	0.0523456	4.8346	0.10595	8.89473	0.0557415	4.28209	0.00860314	1.43809	0.0707442	0.00351193	6.64407	1475.88	95.7478	95.7478	55.1882	1.58053	2.03462	54.0534	4.62262	4.80915	70.4769	9.38244	9.61245
13C_ROV7-1_Grain_X-2	13C_ROV7-1_Grain_137	-4.63744	8401.25	248.599	0.158483	-110.736	-5.2464	122.76	1.06799	0.0493766	2.87047	0.0515955	6.96589	0.0566843	2.62846	0.00865274	1.04206	-0.0157431	0.00253403	6.48046	1104.59	78.7437	78.7437	55.5212	1.15218	1.72888	55.4518	2.86332	3.1607	50.9644	6.61262	6.7829
13C_ROV7-1_Grain_X-3	13C_ROV7-1_Grain_137	6.53598	10323	281.997	0.141869	-116.139	-5.55194	120.282	0.98042	0.0708149	2.36281	0.108808	4.17763	0.082328	2.15894	0.0087317	0.970163	0.0501836	0.00652655	3.88034	1289.3	68.3019	68.3019	56.0279	1.08231	1.69198	79.382	3.30813	3.80636	131.041	10.1448	10.8578
13C_ROV7-1_Grain_26	13C_ROV7-1_Grain_137	16.548	6434.53	177.875	0.233383	-79.8318	-5.43223	125.072	1.21234	0.0490813	3.39857	0.0794561	5.87251	0.0551826	3.12969	0.00863139	1.17152	0.0590931	0.00269985	5.35635	1197.82	79.6902	79.6902	55.38	1.29183	1.82245	53.5946	3.30046	3.54569	54.349	5.82496	6.04326
13C_ROV7-1_Grain_25	13C_ROV7-1_Grain_137	6.97303	7430.74	206.65	0.142969	-87.1358	-5.66232	123.875	1.14585	0.0511165	3.0517	0.0522977	7.20537	0.0604993	2.92062	0.00864384	1.0682	0.105118	0.00281983	6.96793	1197.79	79.0061	79.0061	55.4634	1.17987	1.74646	59.2389	3.41204	3.70166	56.6431	7.90784	8.08429
13C_ROV7-1_Grain_1	13C_ROV7-1_Grain_137	1.19854	18275.4	180.448	0.166866	-220.047	-5.2678	43.2166	1.0894	0.0640775	1.57804	0.0378818	5.46021	0.211912	1.50386	0.0245352	1.02273	0.29342	0.00446736	4.97613	990.158	51.4134	51.4134	156.119	3.15695	4.78714	193.927	5.37079	6.93544	89.7471	8.93074	9.31745
13C_ROV7-1_Grain_27	13C_ROV7-1_Grain_137	10.3436	6693.66	182.936	0.142736	-82.2907	-5.57384	119.739	1.26487	0.0524076	3.1269	0.0435833	9.78466	0.0615216	2.94964	0.00905973	1.17748	0.0522238	0.00217805	9.94748	1210.02	78.8459	78.8459	58.1146	1.3624	1.91719	60.1981	3.51329	3.8059	43.6452	8.72127	8.81728
13C_ROV7-1_Grain_51	13C_ROV7-1_Grain_137	-17.7967	5593.96	156.55	0.229564	-70.5587	-5.38494	125.469	1.38796	0.0511638	3.6535	0.0878728	7.03074	0.0589749	3.35447	0.00882066	1.27119	0.0152747	0.0027768	6.24454	1362.77	91.1685	91.1685	56.5844	1.43233	1.94346	57.5983	3.83764	4.08696	56.2743	7.02942	7.22419
13C_ROV7-1_Grain_78	13C_ROV7-1_Grain_137	28.5228	5338.5	120.367	0.244669	-63.5082	-5.54881	106.154	1.87834	0.0627037	5.49657	0.106588	6.87133	0.0865936	3.3118	0.0111	1.42746	0.0161873	0.00437609	5.4757	1388.27	85.4691	85.4691	71.1052	2.01939	2.6073	81.8697	5.30176	5.65486	87.8533	9.62186	9.96719
13C_ROV7-1_Grain_77	13C_ROV7-1_Grain_137	21.2162	4618.56	130.598	0.240289	-56.3476	-5.34696	127.723	1.61046	0.0476741	4.34179	0.0746489	8.8577	0.0545043	4.03257	0.00891056	1.3814	0.0364778	0.00241606	7.77714	1408.68	96.4902	96.4902	57.1531	1.57184	2.05677	53.0859	4.26485	4.45841	48.9924	7.61447	7.75114
13C_ROV7-1_Grain_76	13C_ROV7-1_Grain_137	3.9497	10942.4	98.6349	0.337688	-125.999	-5.90697	39.6635	1.41599	0.0711607	2.15575	0.116902	3.88965	0.268024	2.05468	0.0278816	1.27089	0.194914	0.00918969	3.06573	1255.51	64.4822	64.4822	177.008	4.43448	6.01744	234.484	8.73984	10.1832	184.998	11.3371	12.5893
13C_ROV7-1_Grain_75	13C_ROV7-1_Grain_137	-25.8733	4236.72	111.993	0.208863	-46.8138	-6.0496	120.674	1.90746	0.056283	5.3678	0.0931483	14.5112	0.0645743	4.22803	0.00970473	1.47616	0.177433	0.00325515	8.5068	1472.66	102.953	102.953	62.3255	1.84008	2.3447	61.2532	5.11687	5.32855	65.149	11.1302	11.2974
13C_ROV7-1_Grain_74	13C_ROV7-1_Grain_137	-36.1711	4046.85	121.474	0.340936	-47.0111	-5.8359	136.302	1.99128	0.0563571	5.63501	0.516697	72.5298	0.0565558	4.79153	0.00877984	1.53104	-0.0158186	0.00298742	5.96621	1498.9	96.9324	96.9324	56.4121	1.72755	2.17136	53.5821	5.10166	5.26672	60.0689	7.17138	7.38878
13C_ROV7-1_Grain_72+73	13C_ROV7-1_Grain_137	23.658	4324.87	125.489	0.196146	-57.2344	-5.23671	133.311	1.87803	0.0553373	4.73914	0.0793896	13.7604	0.0592824	3.97653	0.0088683	1.53805	0.107613	0.00245395	10.1463	1479.82	100.695	100.695	56.8755	1.74173	2.1855	57.2656	4.52334	4.73434	49.1035	10.0142	10.1202
13C_ROV7-1_Grain_71	13C_ROV7-1_Grain_137	-2.76236	3180.46	93.516	0.21222	-38.7277	-5.68209	139.998	2.13378	0.0527811	6.02297	0.0851904	16.9818	0.057022	5.03429	0.00878047	1.6692	0.0370653	0.00282263	10.5613	1650.56	103.737	103.737	56.3078	1.87171	2.28302	54.0256	5.50177	5.66325	56.3478	11.9819	12.099
13C_ROV7-1_Grain_69	13C_ROV7-1_Grain_137	-1.64409	6048.1	182.979	0.182715	-71.808	-5.34254	129.028	1.32683	0.0488272	3.4333	0.0625259	7.81425	0.0552409	3.23873	0.008486	1.25781	0.0909098	0.00270156	7.01054	1179.75	82.5269	82.5269	54.5293	1.37245	1.87127	53.7866	3.43486	3.67372	54.2784	7.62336	7.79141
13C_ROV7-1_Grain_68	13C_ROV7-1_Grain_137	8.25464	8752.73	247.189	0.144362	-98.3261	-5.44474	124.693	1.14351	0.0556904	2.55036	0.063843	5.4034	0.0636101	2.41436	0.00858933	1.08512	0.132375	0.00356008	5.17528	1119.73	67.4071	67.4071	55.1146	1.19092	1.74793	62.0602	2.93372	3.29175	71.5906	7.41237	7.70957
13C_ROV7-1_Grain_67	13C_ROV7-1_Grain_137	-14.9253	3475.82	94.9162	0.193457	-39.4829	-5.54671	132.824	1.8098	0.0501407	5.92377	0.0737005	13.6157	0.056888	4.83803	0.00877977	1.56663	0.074206	0.00285502	10.4137	1559.34	111.605	111.605	56.309	1.75647	2.18942	54.7068	5.31002	5.47858	57.0032	11.9451	12.0652
13C_ROV7-1_Grain_66	13C_ROV7-1_Grain_137	-11.6507	3254.74	85.2508	0.27065	-36.6369	-5.87544	132.611	2.17447	0.0552287	5.99686	0.0856925	17.593	0.0572196	5.17624	0.00920275	1.62158	0.0199246	0.00280341	8.60743	1644.98	111.676	111.676	59.004	1.9053	2.34658	55.3745	5.82622	5.9881	56.174	9.71123	9.85377
13C_ROV7-1_Grain_40	13C_ROV7-1_Grain_137	3.33355	9866.24	207.775	0.354997	-117.803	-6.21065	100.137	1.44918	0.0520632	2.7341	0.21936	3.59465	0.0800256	2.56766	0.0111932	1.34505	0.0196502	0.00516888	3.12352	1117.93	69.9028	69.9028	71.7049	1.91743	2.53738	77.3191	3.90224	4.32599	104.023	6.48897	7.18067
13C_ROV7-1_Grain_41	13C_ROV7-1_Grain_137	1.44069	8438.52	246.324	0.147911	-96.849	-5.22583	128.328	1.09103	0.0484554	2.65328	0.0492001	6.84246	0.0538146	2.5323	0.00831687	1.06919	0.0830397	0.00262921	6.56696	1004.53	68.0882	68.0882	53.3747	1.13651	1.68144	52.6321	2.61199	2.90321	52.8629	6.95007	7.12442
13C_ROV7-1_Grain_42	13C_ROV7-1_Grain_137	-4.28401	36702.5	382.306	0.356742	-436.905	-6.60861	46.615	0.905446	0.0599828	1.41024	0.0895191	2.30077	0.181955	1.37123	0.0218675	0.887535	0.238249	0.00526122	2.50775	737.58	49.2231	49.2231	139.4	2.44864	4.04236	168.821	4.26371	5.72488	105.991	5.30074	6.15519
13C_ROV7-1_Grain_65	13C_ROV7-1_Grain_137	-2.1072	6086.18	168.477	0.368726	-70.636	-5.28228	125.311	1.34975	0.0522357	3.34338	0.138203	5.02649	0.0590272	3.19577	0.00876796	1.24388	0.0646326	0.00281149	4.43646	1294.57	82.934	82.934	56.2491	1.39321	1.90945	57.3298	3.59868	3.85548	56.637	5.02361	5.29583
13C_ROV7-1_Grain_64	13C_ROV7-1_Grain_137	1.58944	25749.7	156.796	1.05778	-287.179	-5.80493	25.466	0.844612	0.0511618	1.5991	0.325849	1.43995	0.282773	1.47628	0.0409457	0.879113	0.169022	0.0125846	1.20727	759.109	48.607	48.607	258.42	4.44816	7.38786	250.516	6.76665	8.80356	252.615	6.06148	9.5901
13C_ROV7-1_Grain_63	13C_ROV7-1_Grain_137	11.6933	4280.83	123.944	0.18301	-50.6912	-5.33906	134.988	1.62355	0.0585264	4.16373	0.0674781	10.148	0.0627652	3.81026	0.00847249	1.38628	0.0318942	0.00262075	9.08038	1563.58	96.5906	96.5906	54.3564	1.50077	1.96089	60.279	4.55505	4.786	53.0757	9.6378	9.765
13C_ROV7-1_Grain_62	13C_ROV7-1_Grain_137	-49.2136	3457.95	100.811	0.189934	-35.6312	-6.08791	141.136	2.02487	0.052312	5.77437	0.0774983	13.7869	0.050498	5.15544	0.00840771	1.5521	0.00989842	0.00241387	11.7165	1642.08	108.212	108.212	53.9352	1.66757	2.08557	48.4425	5.04876	5.19016	48.1688	11.3762	11.4666
13C_ROV7-1_Grain_58	13C_ROV7-1_Grain_137	5.86272	5821.4	164.473	0.230259	-67.2959	-5.44343	125.823	1.43312	0.0482568	3.70525	0.0765995	7.68707	0.0554154	3.43316	0.00883198	1.26172	0.0372231	0.00257128	6.58864	1239.8	86.4412	86.4412	56.6571	1.42358	1.93822	53.6205	3.63087	3.85638	51.7027	6.82088	6.99088
13C_ROV7-1_Grain_57	13C_ROV7-1_Grain_137	46.1692	3552.81	99.1585	0.232684	-36.8775	-5.96145	133.204	1.95001	0.0565833	5.50384	0.0963197	10.9514	0.0579303	4.74452	0.00890374	1.5524	0.0200987	0.00288624	8.33973	1654.36	105.302	105.302	57.2086	1.77696	2.22222	55.1019	5.25623	5.42961	57.8457	9.68341	9.83474
13C_ROV7-1_Grain_56	13C_ROV7-1_Grain_137	2.78897	12024.5	110.859	0.29192	-132.329	-6.0346	49.9645	2.66723	0.0827749	2.07069	0.163868	2.98759	0.319942	2.44454	0.0271393	1.79936	0.681361	0.0152775	2.87321	1467.74	58.4755	58.4755	172.117	6.12045	7.29275	271.616	12.1335	13.5798	306.174	17.5351	19.7251
13C_ROV7-1_Grain_55	13C_ROV7-1_Grain_137	26.1308	5176.56	145.956	0.221123	-50.1049	-5.87006	126.051	1.42862	0.0478535	4.08551	0.0895036	7.2575	0.0542602	3.78866	0.00882111	1.28708	0.0227311	0.00306423	6.27926	1403.4	89.8949	89.8949	56.5865	1.45028	1.95676	52.7856	3.97767	4.1816	61.5797	7.74341	7.95563
13C_ROV7-1_Grain_50	13C_ROV7-1_Grain_137	-3.23144	5080.41	143.782	0.180507	-54.8319	-5.42954	126.104	1.5688	0.0505955	4.32437	0.0496637	11.307	0.0548679	3.76575	0.00894865	1.3424	-0.0494449	0.00216352	9.91366	1385.27	94.1214	94.1214	57.3981	1.53429	2.0321	53.1171	3.96611	4.17187	43.3584	8.63756	8.7333
13C_ROV7-1_Grain_48 core	start of signal	-0.865007	61294.9	848.766	0.375195	-659.757	-9.45754	51.1821	1.45819	0.0521926	1.84774	0.254768	2.15703	0.142936	1.87305	0.0202744	1.5348	0.426812	0.0135719	1.93959	530.792	56.9018	56.9018	129.332	3.92746	4.93197	135.117	4.74497	5.67472	272.341	10.4959	13.2029
13C_ROV7-1_Grain_47	13C_ROV7-1_Grain_137	13.1128	4543.69	130.535	0.27329	-50.0948	-5.52312	128.383	1.70043	0.0500692	5.29136	0.111385	9.10581	0.0539592	4.6129	0.00885681	1.39598	0.0371327	0.00287833	6.63633	1480.06	101.898	101.898	56.8094	1.57941	2.05772	52.2525	4.84979	5.01887	57.8373	7.68813	7.87704
13C_ROV7-1_Grain_46	13C_ROV7-1_Grain_137	-29.3821	4237.82	106.76	0.239628	-45.6159	-5.40288	116.888	1.74541	0.0497665	4.87428	0.0995178	8.7569	0.0609362	4.3407	0.00991468	1.45687	-0.00586978	0.00310843	7.30576	1503.76	110.472	110.472	63.5531	1.84283	2.36021	59.0518	5.10407	5.3046	62.3682	9.13427	9.31985
13C_ROV7-1_Grain_45	13C_ROV7-1_Grain_137	9.82817	8749.61	239.609	0.365017	-79.3792	-6.00435	117.611	1.12505	0.0491325	2.77623	0.117852	3.91675	0.0595717	2.54448	0.00906037	1.06678	0.122947	0.0027741	3.39962	1085.32	79.7492	79.7492	58.1232	1.2344	1.8285	58.2099	2.90448	3.22536	56.1661	3.8263	4.17323
13C_ROV7-1_Grain_44	end of signal	-3.66543	6431.84	72.8597	0.369469	-79.2079	-10.397	53.3678	2.64661	0.0550823	7.09818	0.400943	6.33064	0.147858	6.57448	0.0198942	2.32972	0.0148054	0.0205762	4.82224	1260.97	178.693	178.693	126.895	5.85959	6.55226	134.972	17.1757	17.473	410.346	39.2294	41.0358
13C_ROV7-1_Grain_43	13C_ROV7-1_Grain_137	34.2559	3836.73	107.261	0.167127	-36.841	-5.83249	128.718	1.65575	0.048974	5.06857	0.0796348	11.7375	0.0527978	4.6531	0.00886602	1.49302	0.0452584	0.00321117	9.29597	1513.94	101.06	101.06	56.966	1.70172	2.15903	50.8688	4.75225	4.91513	64.1754	12.003	12.1542
13C_ROV7-1_Grain_39	13C_ROV7-1_Grain_137	3.41759	3704.12	105.812	0.230669	-42.654	-5.38275	138.406	1.9381	0.0556266	5.39884	0.101716	13.1757	0.0580171	4.72347	0.00866131	1.54676	0.0924597	0.00284672	8.29585	1627.42	101.055	101.055	55.5541	1.71139	2.14305	54.9249	5.18234	5.35479	57.0652	9.49919	9.6492
13C_ROV7-1_Grain_37 core	13C_ROV7-1_Grain_137	0.496791	138818	761.854	0.473673	-1424.42	-5.26735	23.5438	0.78927	0.0638799	0.688867	0.217863	0.836635	0.388401	0.836028	0.0441137	0.811051	0.624868	0.0208984	1.00803	744.684	27.0731	27.0731	278.017	4.40675	7.71632	331.284	4.69623	8.34789	417.749	8.32528	14.7905
13C_ROV7-1_Grain_37 rim	13C_ROV7-1_Grain_137	11.798	6879.75	185.269	0.198739	-69.5	-5.45209	118.992	1.31444	0.0503627	3.22807	0.0643272	6.87601	0.059319	2.94609	0.00918429	1.18935	0.0525015	0.00271721	6.44599	1232.45	83.1628	83.1628	58.909	1.39497	1.95334	58.376	3.42012	3.70562	54.6307	7.05093	7.23442
13C_ROV7-1_Grain_36	end of signal	-3.74375	24131.1	120.679	0.530131	-255.413	-6.53474	22.0391	0.942456	0.0542266	1.763	0.177959	2.07466	0.34926	1.7099	0.0466152	0.900174	0.158493	0.0158891	2.00205	737.169	60.4305	60.4305	293.5	5.16931	8.45812	300.908	8.97714	11.0543	319.233	12.7827	15.8968
13C_ROV7-1_Grain_35	13C_ROV7-1_Grain_137	17.3225	4739.18	123.704	0.270611	-51.6508	-5.59748	116.978	1.56616	0.0528774	4.26401	0.105664	7.19148	0.0643569	4.00711	0.00958453	1.50414	0.0510485	0.00300675	6.69385	1415.19	92.8506	92.8506	61.5648	1.85205	2.3432	62.1149	4.93036	5.15692	60.4317	8.10156	8.29726
13C_ROV7-1_Grain_34	end of signal	4.95313	34509	185.028	0.426891	-370.063	-11.6711	24.2602	1.25449	0.0583904	3.17545	0.147838	3.46453	0.33532	2.93324	0.0418202	1.27036	0.0677986	0.0149789	3.23621	773.156	105.34	105.34	264.92	6.3429	8.60895	290.426	14.771	16.0145	300.241	19.2912	21.2132
13C_ROV7-1_Grain_33	13C_ROV7-1_Grain_137	-0.509113	5871.68	145.241	0.264838	-60.4309	-10.4459	116.524	2.24505	0.0588101	7.74933	0.0907454	11.5053	0.0679024	6.8303	0.00921049	2.38574	-0.0763605	0.00301107	11.193	1470.03	175.906	175.906	59.0766	2.80541	3.12243	65.0649	8.80169	8.94295	60.573	13.565	13.6831
13C_ROV7-1_Grain_32	13C_ROV7-1_Grain_137	10.5155	4372.92	132.334	0.23201	-43.4822	-5.39039	127.057	1.50181	0.0526309	4.40141	0.0922789	8.77761	0.058511	4.15323	0.0087988	1.31889	0.0107851	0.00275476	7.22782	1506.54	93.1523	93.1523	56.4427	1.48257	1.97873	56.1452	4.63943	4.83818	55.8403	8.07763	8.24526
13C_ROV7-1_Grain_31	13C_ROV7-1_Grain_137	5.29403	8217.48	252.937	0.198871	-69.5423	-5.8768	123.34	1.16113	0.0506335	2.93063	0.065426	5.7022	0.0572746	2.73405	0.00877997	1.11744	0.0262137	0.00274545	5.43203	1067.42	72.072	72.072	56.3309	1.25332	1.81122	55.7781	2.98328	3.27067	55.6167	6.04197	6.26225
13C_ROV7-1_Grain_30	13C_ROV7-1_Grain_137	1.67983	6288.33	182.096	0.223336	-57.9414	-5.55647	118.239	1.36168	0.0481507	3.59783	0.143399	49.7604	0.0583197	3.35015	0.0092602	1.21527	0.0767612	0.00278255	7.3759	1197.55	85.1924	85.1924	59.3923	1.43704	1.99133	56.5644	3.74629	3.99029	55.8708	8.1817	8.34481
13C_ROV7-1_Grain_29	13C_ROV7-1_Grain_137	35.9952	7193.66	222.033	0.187434	-141.399	-51.0077	122.658	1.21078	0.0504064	3.11409	0.0623668	6.52007	0.0578278	2.87973	0.00884115	1.16737	0.289811	0.0026887	5.91582	1163.79	84.1521	84.1521	56.7196	1.31811	1.86283	56.4039	3.18877	3.46687	54.0938	6.40563	6.60309
13C_ROV7-1_Grain_49	13C_ROV7-1_Grain_137	-5.34982	4266.47	134.265	0.221427	-41.3733	-5.60389	130.909	1.66522	0.0511257	4.54534	0.0816349	9.56809	0.0567972	4.12059	0.00870287	1.45815	0.0712422	0.00287107	7.56406	1468.51	99.4226	99.4226	55.8238	1.62094	2.07531	54.8837	4.4982	4.6939	57.6162	8.73903	8.90477
13C_ROV7-1_Grain_28	13C_ROV7-1_Grain_137	6.85444	7635.95	186.849	0.247923	-77.1168	-5.38434	93.451	1.11708	0.0495997	3.28618	0.0990817	4.48372	0.0759205	3.05442	0.011427	1.07343	0.086339	0.00427355	4.20034	1166.2	83.254	83.254	73.2118	1.56282	2.3072	72.8944	4.36586	4.70584	85.9647	7.21688	7.65185
13C_ROV7-1_Grain_24	13C_ROV7-1_Grain_137	-0.698188	7105.1	207.411	0.125601	-71.3633	-5.24498	118.116	1.34107	0.05862	2.89	0.0512208	7.58008	0.0694884	2.56814	0.00935071	1.23728	-0.00258931	0.00355908	6.93218	1202.75	76.9469	76.9469	59.9687	1.47702	2.02938	67.2262	3.3773	3.7439	71.3817	9.9185	10.1421
13C_ROV7-1_Grain_3	13C_ROV7-1_Grain_137	9.90067	4328.27	136.209	0.235272	-35.3691	-6.26756	130.061	1.62089	0.0486175	4.5295	0.0833186	9.26318	0.0576008	4.15727	0.00874656	1.41918	0.0811856	0.00245951	8.39859	1467.38	101.176	101.176	56.1046	1.58571	2.05212	55.5896	4.58112	4.777	49.351	8.31465	8.44279
13C_ROV7-1_Grain_4	13C_ROV7-1_Grain_137	9.28104	9245.7	293.782	0.126277	-90.8626	-5.15832	124.025	1.04511	0.0473458	2.55584	0.0458571	6.99589	0.0542726	2.38995	0.00857491	1.009	0.0477571	0.00281132	6.41754	937.678	70.549	70.549	55.0251	1.10555	1.68934	53.1274	2.48906	2.79871	56.5141	7.26375	7.45445
13C_ROV7-1_Grain_5 core	13C_ROV7-1_Grain_137	0.0137106	66070.2	322.965	0.513285	-604.897	-5.21012	18.4626	0.769477	0.0953509	0.767834	0.148694	1.12546	0.737613	0.886367	0.0559966	0.760521	0.557796	0.0166093	1.14385	1503.32	29.0933	29.0933	350.865	5.19347	9.50526	556.788	7.75482	13.2547	332.706	7.54794	12.3438
13C_ROV7-1_Grain_5 rim	13C_ROV7-1_Grain_137	12.3621	7042.53	215.868	0.16131	-66.5357	-5.45986	121.337	1.15085	0.0487522	3.06479	0.0515299	7.79091	0.0565763	2.81456	0.00881368	1.09707	-0.00146899	0.00258814	7.28578	1132.94	79.1752	79.1752	56.547	1.23535	1.8026	55.2521	3.06391	3.34312	51.9942	7.58852	7.74354
13C_ROV7-1_Grain_23	13C_ROV7-1_Grain_137	-4.91548	5583.8	170.91	0.212004	-58.4706	-6.25441	122.24	1.77185	0.047013	4.90595	0.0738494	8.83928	0.0558157	4.60396	0.00903847	1.66279	0.0576365	0.00272872	8.43257	1261.52	111.373	111.373	57.9719	1.91884	2.34346	54.1646	4.94946	5.12268	54.8399	9.26113	9.40272
13C_ROV7-1_Grain_22	13C_ROV7-1_Grain_137	11.1766	6498.81	196.076	0.265608	-59.063	-5.51107	126.533	1.38605	0.0474228	3.45747	0.0986966	5.73224	0.0543158	3.25259	0.00870317	1.26903	0.0511039	0.00278123	4.8194	1196.02	87.1643	87.1643	55.8344	1.41105	1.91608	52.7165	3.37426	3.60697	56.0102	5.39912	5.64801
13C_ROV7-1_Grain_6	13C_ROV7-1_Grain_137	6.65503	3942.81	115.624	0.25627	-35.9129	-5.79172	129.471	1.70892	0.0504516	4.76093	0.110682	8.52895	0.0567207	4.35205	0.00886978	1.46712	0.0472971	0.00320793	6.50072	1527.18	101.805	101.805	56.8886	1.662	2.12282	54.3689	4.72752	4.91231	64.9224	8.44082	8.65686
13C_ROV7-1_Grain_7	13C_ROV7-1_Grain_137	-1.73874	6902.06	191.596	0.168515	-59.2502	-5.60642	128.656	1.41357	0.0506149	3.37861	0.0651667	13.3726	0.055473	3.02607	0.00858748	1.14242	0.0311101	0.00237744	7.26948	1176.96	81.3835	81.3835	55.1007	1.2537	1.79123	54.4942	3.27295	3.53244	47.7858	6.96067	7.10349
13C_ROV7-1_Grain_8 core	13C_ROV7-1_Grain_137	0.356432	195879	121.63	0.372915	-1675.98	-5.4295	2.6405	0.661984	0.185533	0.531808	0.128861	0.804959	9.96647	0.625245	0.387865	0.66459	0.655154	0.136479	0.808375	2689.31	17.7014	17.7014	2105.24	23.7315	47.9184	2423.4	11.6976	25.7918	2581.48	39.3363	82.0661
13C_ROV7-1_Grain_19-21	13C_ROV7-1_Grain_137	-17.7777	5016.65	131.408	0.294342	-48.7906	-5.30515	127.988	1.77789	0.0472895	4.31922	0.114245	6.70113	0.0537272	3.92442	0.00895586	1.33748	0.0233145	0.00288574	5.62089	1368.65	98.8075	98.8075	57.4443	1.52996	2.02958	51.7326	4.02398	4.21658	58.0581	6.53139	6.75405
13C_ROV7-1_Grain_18	13C_ROV7-1_Grain_137	10.6233	3846.46	105.196	0.253526	-35.7156	-5.51526	137.799	2.06777	0.0592358	5.01271	0.0882947	12.2301	0.0604178	4.26316	0.00870451	1.55612	0.00606542	0.00255931	8.18253	1572.42	102.045	102.045	55.8294	1.73005	2.1617	57.7673	4.90328	5.10286	51.355	8.42919	8.56599
13C_ROV7-1_Grain_17	13C_ROV7-1_Grain_137	8.46378	4712.98	127.366	0.230181	-44.7356	-5.50604	128.369	1.55987	0.0536652	4.17476	0.0884133	8.18992	0.059743	3.86715	0.00878073	1.44443	0.0622508	0.00278558	7.20231	1447.05	95.8844	95.8844	56.3215	1.61967	2.08139	57.5062	4.40697	4.62405	55.9416	8.07482	8.24357
13C_ROV7-1_Grain_9 core	13C_ROV7-1_Grain_137	8.97885	18674.8	281.28	0.428286	-160.907	-5.51336	64.8121	0.858004	0.047682	1.82206	0.147918	5.12136	0.104104	1.71207	0.0160204	0.848511	0.156285	0.00523862	1.94741	730.293	53.7878	53.7878	102.518	1.73512	2.94854	99.9977	3.29924	4.06088	105.534	4.09955	5.14929
13C_ROV7-1_Grain_9 rim	13C_ROV7-1_Grain_137	9.32213	5483.81	143.569	0.164968	-50.6166	-5.35605	124.921	1.74152	0.0488699	3.75217	0.0384355	31.1143	0.0574594	3.52176	0.00922252	1.36703	0.054445	0.00243862	9.5379	1249.21	88.5961	88.5961	59.1449	1.60974	2.11561	55.4576	3.84793	4.07538	48.8539	9.36139	9.47344
13C_ROV7-1_Grain_16	13C_ROV7-1_Grain_137	49.8533	4943.84	133.287	0.230533	-39.5341	-6.01567	127.748	1.65885	0.0529897	4.04086	0.0901325	7.59725	0.0580802	3.62853	0.00891672	1.34236	0.0536387	0.00287759	6.84744	1361.58	91.3857	91.3857	57.1943	1.52907	2.02521	56.1676	4.03287	4.25779	57.8062	7.92954	8.11268
13C_ROV7-1_Grain_15	13C_ROV7-1_Grain_137	14.5652	5851.6	160.232	0.253262	-52.5332	-5.52205	123.244	1.32827	0.0503861	3.63059	0.089391	6.30053	0.059717	3.3014	0.00892693	1.23352	0.100093	0.0027096	5.79106	1284.36	85.0018	85.0018	57.2644	1.40658	1.93536	57.6754	3.74896	4.00016	54.5198	6.31876	6.52189
13C_ROV7-1_Grain_10	13C_ROV7-1_Grain_137	6.63623	7126.59	200.339	0.20096	-58.055	-5.69616	122.81	1.15631	0.0493474	3.12109	0.0633077	6.48593	0.0570309	2.84688	0.00873831	1.11649	0.0357059	0.00252121	6.03779	1129.81	81.0584	81.0584	56.0649	1.24645	1.80208	55.6633	3.12444	3.403	50.7319	6.13018	6.31169
13C_ROV7-1_Grain_14	13C_ROV7-1_Grain_137	39.149	5218.26	152.795	0.197367	-45.3531	-5.57055	134.077	1.44221	0.0529612	3.98663	0.154685	52.6077	0.0548586	3.51078	0.00836517	1.30259	-0.00371695	0.00280642	7.99074	1346.7	91.5314	91.5314	53.6747	1.39239	1.86861	53.2688	3.6957	3.91548	56.2913	9.01109	9.16437
13C_ROV7-1_Grain_11	13C_ROV7-1_Grain_137	12.6841	9166.05	231.935	0.373586	-77.5274	-5.56114	110.432	1.12207	0.0908959	3.2496	0.314184	2.94142	0.122954	3.41977	0.00968231	1.09802	0.146752	0.00780998	3.33319	1751.44	100.992	100.992	62.0909	1.35671	1.97879	113.599	7.20049	7.65107	156.774	10.3871	11.3652
13C_ROV7-1_Grain_12	13C_ROV7-1_Grain_137	-0.580882	7979.5	225.758	0.181569	-67.9888	-5.41165	121.901	1.13836	0.0511404	2.82517	0.0596958	5.96847	0.0591434	2.58355	0.00876742	1.07801	-0.00415388	0.00275685	5.68321	1126.8	76.3005	76.3005	56.2522	1.20751	1.77856	57.6083	2.91345	3.22613	55.4724	6.30887	6.51933
13C_ROV7-1_Grain_146	13C_ROV7-1_Grain_137	15.9252	6223.45	191.941	0.18233	-53.8248	-5.42178	134.144	1.19404	0.0528899	3.40446	0.0584754	7.59396	0.0549734	3.10418	0.00804121	1.12525	-0.0225627	0.00224028	7.17662	1273.92	79.2474	79.2474	51.6115	1.15687	1.66581	53.4184	3.26381	3.51017	45.0488	6.47853	6.61489
13C_ROV6-5_Grain_1 core	13C_ROV7-1_Grain_137	0.381739	93274.5	84.8102	0.288092	-759.047	-5.17341	3.70554	0.615048	0.105649	0.656759	0.0821374	1.25137	4.01459	0.635034	0.274347	0.616701	0.47159	0.0804621	1.1853	1697.05	24.5698	24.5698	1559.9	17.1318	36.6378	1630.25	10.4339	22.7242	1558.7	35.5928	56.9417
13C_ROV6-5_Grain_2	13C_ROV7-1_Grain_137	29.7664	4426.19	134.561	0.225805	-35.177	-5.95042	140.654	1.72095	0.0562418	4.34737	0.0797976	9.45775	0.0602474	3.92784	0.0082817	1.46537	0.0343382	0.00248746	8.0261	1583.67	95.8843	95.8843	53.1347	1.55063	1.98148	57.9061	4.51183	4.72741	49.9345	8.03665	8.17217
13C_ROV6-5_Grain_3 A	13C_ROV7-1_Grain_137	25.4871	5719.86	159.862	0.505585	-42.5894	-6.09948	127.902	1.47022	0.0509931	3.78832	0.199779	5.30343	0.056687	3.34926	0.00876222	1.27607	0.0313087	0.00277645	3.84955	1314.88	85.3391	85.3391	56.2111	1.42832	1.93462	55.2559	3.66972	3.90886	55.96	4.30689	4.61429
13C_ROV6-5_Grain_3 B	common lead	15.9349	11769.2	288.83	0.872168	-83.4092	-6.29258	103.829	1.01857	0.187594	1.98317	0.622856	1.94023	0.264188	1.99609	0.0101403	1.01656	0.332609	0.00725162	1.82809	2602.54	68.952	68.952	65.0932	1.32326	2.0134	232.27	8.52012	10.0047	145.92	5.31703	6.8413
13C_ROV6-5_Grain_4 core	13C_ROV7-1_Grain_137	-3.11725	23052.7	242.15	0.188529	-188.108	-6.09097	48.5657	1.26834	0.0531335	1.82126	0.0544304	4.84954	0.161808	1.78408	0.0221385	1.13936	0.419457	0.0061381	3.54302	832.422	51.9885	51.9885	141.201	3.2001	4.57857	150.97	5.04835	6.12976	123.355	8.73014	9.46133
13C_ROV6-5_Grain_5 core	13C_ROV7-1_Grain_137	0.0834935	529873	461.3	0.25429	-4713.05	-4.79303	3.65745	0.486988	0.120036	0.399804	0.0717252	0.651957	4.60575	0.456125	0.275784	0.47401	0.452484	0.081332	0.691684	1947.45	13.8524	13.8524	1568.57	13.2348	35.1414	1745.4	7.34153	21.1003	1579.81	20.8492	49.2498
13C_ROV6-5_Grain_5 rim	13C_ROV7-1_Grain_137	-6.6133	8080.79	230.02	0.124403	-69.5075	-5.22499	125.352	1.10629	0.0504623	2.73722	0.0449963	8.14833	0.0581046	2.59716	0.00854304	1.07947	0.132552	0.00286088	7.78113	1084.48	72.7081	72.7081	54.8192	1.17841	1.73444	56.7947	2.89949	3.20756	57.3937	8.95408	9.11464
13C_ROV6-5_Grain_6	13C_ROV7-1_Grain_137	-0.684143	30209.3	87.4506	0.379638	-254.741	-6.67755	48.4187	5.46648	0.198222	2.08987	0.164291	10.1802	2.67691	3.01362	0.0789841	2.80361	0.96295	0.025546	3.115	3013.19	46.3325	46.3325	479.992	26.3099	28.4938	1085.4	54.4295	58.7792	505.345	31.1925	34.5348
13C_ROV6-5_Grain_7	13C_ROV7-1_Grain_137	23.0818	4277.25	117.273	0.218687	-33.5172	-5.77784	131.329	1.64572	0.0520762	4.41662	0.0778074	8.98455	0.0543556	3.90368	0.00872346	1.4393	-0.0884861	0.00263616	8.03927	1474.14	101.231	101.231	55.9562	1.6036	2.06363	52.5486	4.0754	4.27249	52.8964	8.52827	8.67161
13C_ROV6-5_Grain_8 core	end of signal	0.906605	55003	298.405	1.11874	-428.534	-8.0792	25.0063	0.676133	0.0508675	1.34364	0.355088	1.24375	0.284497	1.30103	0.0403835	0.683476	0.180443	0.0133443	1.07437	487.237	45.9409	45.9409	255.143	3.41958	6.76114	254.006	5.98814	8.23626	267.875	5.71887	9.73551
13C_ROV6-5_Grain_9	13C_ROV7-1_Grain_137	-10.6795	5252.36	143.524	0.207528	-42.4188	-5.44198	128.803	1.38195	0.0513391	3.62825	0.0825077	7.70465	0.0584127	3.36661	0.00855705	1.25432	0.034596	0.00290257	6.49415	1313.56	86.181	86.181	54.902	1.37159	1.87252	56.6412	3.7656	4.00853	58.3324	7.58644	7.78099
13C_ROV6-5_Grain_17	13C_ROV7-1_Grain_137	-0.402749	8113.76	213.216	0.386855	-65.6405	-5.64472	121.628	1.02885	0.0465215	2.93235	0.143243	3.78149	0.0540332	2.78999	0.00865079	1.0239	0.0699995	0.00262144	3.90557	1026.83	71.9125	71.9125	55.5093	1.13186	1.71521	52.7091	2.89411	3.16233	52.842	4.12709	4.41354
13C_ROV6-5_Grain_28	13C_ROV7-1_Grain_137	4.89758	12865.8	123.289	0.343382	-95.7513	-5.87626	45.7714	1.24512	0.0899825	1.68817	0.150528	2.87233	0.289824	1.68764	0.0238189	1.16828	0.406969	0.00985922	2.36638	1467.66	55.9787	55.9787	151.579	3.50034	4.94512	254.156	7.73535	9.56843	198.509	9.39621	11.0829
13C_ROV6-5_Grain_29	13C_ROV7-1_Grain_137	8.90323	4172.27	110.866	0.226938	-30.3949	-6.02361	137.307	1.95396	0.0526001	4.6918	0.0811874	9.11646	0.0537862	4.15333	0.00856533	1.44029	0.0324243	0.00269245	7.93751	1513.12	102.892	102.892	54.9467	1.57653	2.02825	52.1361	4.32608	4.51141	54.026	8.60365	8.75196
13C_ROV6-5_Grain_30	13C_ROV7-1_Grain_137	16.2601	6477.33	147.168	0.350284	-51.2004	-5.52479	109.175	1.29039	0.0494307	3.4189	0.13695	4.69584	0.0653011	3.09666	0.0100136	1.24278	0.139607	0.00359756	3.82348	1188.85	86.3133	86.3133	64.1964	1.58748	2.17662	63.4082	3.87	4.16349	72.4512	5.5355	5.9358
13C_ROV6-5_Grain_31	13C_ROV7-1_Grain_137	29.1551	3817.4	102.83	0.250788	-28.7453	-5.81745	136.53	1.78807	0.0508701	5.84132	0.290942	60.0115	0.0511095	4.83165	0.00844311	1.42956	0.0293466	0.00306613	7.56276	1472.42	106.047	106.047	54.1669	1.54243	1.99029	48.7006	4.67393	4.82268	61.5009	9.31546	9.49219
13C_ROV6-5_Grain_32	13C_ROV7-1_Grain_137	20.6703	6712.64	173.926	0.245215	-52.2654	-5.45046	121.277	1.21841	0.0527017	3.53815	0.0792984	5.89165	0.0593088	3.16491	0.00887342	1.14928	-0.0650609	0.00268651	5.48344	1171.43	84.425	84.425	56.9264	1.30267	1.85555	57.4072	3.54703	3.80494	54.0749	5.93239	6.14471
13C_ROV6-5_Grain_33	13C_ROV7-1_Grain_137	-13.9442	4634.46	123.262	0.247407	-35.1559	-5.70284	131.712	1.61356	0.0502049	4.32023	0.0946387	7.57488	0.0548273	3.7831	0.00864383	1.44461	0.0504734	0.00260442	6.99166	1474.18	109.571	109.571	55.4476	1.595	2.04958	53.5462	4.02288	4.22972	52.3395	7.33078	7.49325
13C_ROV6-5_Grain_34	13C_ROV7-1_Grain_137	28.5583	4233.06	114.251	0.18882	-31.525	-5.56987	135.382	1.74329	0.0481692	4.7162	0.0640558	13.2245	0.0514413	4.2229	0.00856658	1.41688	0.0610516	0.00230988	10.1327	1440.27	100.341	100.341	54.9557	1.55079	2.00825	49.9372	4.19955	4.37369	46.248	9.42446	9.52448
13C_ROV6-5_Grain_35	13C_ROV7-1_Grain_137	-4.32567	6387.03	178.12	0.621497	-49.5422	-5.40582	131.605	1.28761	0.0462274	3.44763	0.194977	3.32472	0.0493168	3.148	0.00828955	1.20736	0.0742116	0.0024085	2.90202	1106.48	85.8179	85.8179	53.1954	1.27915	1.77812	48.4558	3.02471	3.24692	48.5883	2.8177	3.16303
13C_ROV6-5_Grain_36	13C_ROV7-1_Grain_137	-3.92603	15395.3	172.311	0.338071	-119.339	-6.84471	48.1893	1.22842	0.0512581	2.62166	0.142231	3.25054	0.149113	2.44083	0.0216313	1.17007	0.121103	0.00887782	3.0561	828.719	80.3561	80.3561	138.138	3.2292	4.55842	140.192	6.5445	7.32687	178.376	10.8584	12.0649
13C_ROV6-5_Grain_37	13C_ROV7-1_Grain_137	-21.2363	4942.23	130.683	0.223754	-35.615	-5.81185	126.764	1.35882	0.047467	4.27116	0.0744025	7.78291	0.0528133	3.78412	0.00870482	1.34392	-0.0348282	0.00257401	7.21228	1362.75	104.27	104.27	55.8417	1.49416	1.97798	51.6464	3.89223	4.09225	51.7169	7.47547	7.63127
13C_ROV6-5_Grain_38	13C_ROV7-1_Grain_137	10.3764	17376.9	537.573	0.843181	-121.269	-10.3356	128.327	1.5858	0.0543197	3.26404	0.289993	3.25664	0.0581735	3.08922	0.00802097	1.5585	0.1003	0.0026984	2.80055	880.671	96.6732	96.6732	51.4903	1.59863	1.99639	57.5063	3.3551	3.61072	54.4556	3.04621	3.44549
13C_ROV6-5_Grain_39	common lead	17.9579	27102.6	92.9416	0.257173	-15.5966	-25.7332	50.0661	4.70381	0.565993	2.07357	1.46194	2.21233	7.16805	3.29491	0.0697565	2.96781	0.97555	0.542401	3.38758	3149.82	155.608	155.608	426.237	24.8998	26.7519	1634.89	85.3892	91.1326	7721.03	491.814	536.711
13C_ROV6-5_Grain_40	13C_ROV7-1_Grain_137	3.47983	13404.9	366.242	0.1909	-103.697	-5.13261	125.348	0.882667	0.0480143	2.06824	0.0629433	3.72247	0.053015	1.87176	0.00830717	0.84728	-0.000251672	0.00267205	3.5925	878.475	61.6703	61.6703	53.3192	0.899853	1.53059	52.2519	1.91627	2.29223	53.8711	3.86785	4.18327
13C_ROV6-5_Grain_41	13C_ROV7-1_Grain_137	31.2519	3933.78	106.362	0.283979	-27.816	-6.95385	134.251	2.20573	0.056393	5.90394	0.125046	11.6028	0.0601855	5.32325	0.00871665	1.75792	0.055205	0.00272024	8.28387	1620.09	121.567	121.567	55.9122	1.95758	2.34893	56.5519	5.8535	6.00739	54.6644	9.07135	9.21502
13C_ROV6-5_Grain_42	13C_ROV7-1_Grain_137	-8.25459	3402.36	90.6724	0.219614	-22.7167	-6.0292	135.676	1.70129	0.0556632	5.53853	0.0921155	10.5795	0.0572906	4.63295	0.00836315	1.45199	0.0141678	0.00252848	9.63878	1689.66	106.677	106.677	53.6554	1.55191	1.99022	54.6507	5.0728	5.24816	50.6243	9.80493	9.91986
13C_ROV6-5_Grain_43	13C_ROV7-1_Grain_137	38.4913	4482.24	114.658	0.196206	-34.2792	-5.58144	131.858	1.64842	0.0517599	4.38215	0.079917	9.37251	0.0569158	3.89328	0.00868528	1.43003	0.0269865	0.00310306	7.64373	1481.42	96.6179	96.6179	55.713	1.58664	2.04707	54.659	4.22462	4.43	62.2275	9.54212	9.71938
13C_ROV6-5_Grain_44	13C_ROV7-1_Grain_137	-4.11523	6626.8	163.725	0.177562	-48.2324	-5.3158	127.146	1.16902	0.0487166	3.28073	0.0635647	6.99404	0.053622	3.09628	0.00840871	1.12055	0.0782564	0.0026152	6.67364	1137.71	80.8429	80.8429	53.9597	1.20426	1.73781	52.3516	3.19106	3.43311	52.996	7.07145	7.24329
13C_ROV6-5_Grain_45	13C_ROV7-1_Grain_137	18.6104	7925.19	194.74	0.265263	-53.9454	-5.85527	123.508	1.19376	0.0486872	2.94428	0.103214	4.81702	0.0552888	2.76615	0.00872027	1.13895	0.0588151	0.00286878	4.42263	1079.95	77.6678	77.6678	55.9489	1.26902	1.81594	54.2465	2.95209	3.23021	57.7882	5.10954	5.3881
13C_ROV6-5_Grain_46 core	13C_ROV7-1_Grain_137	-0.287686	65025.5	50.4461	0.781946	-504.096	-5.39017	3.83748	0.648516	0.106299	0.736101	0.238603	1.14278	3.87695	0.726282	0.265617	0.615295	0.403499	0.0789999	0.994407	1711.51	27.2099	27.2099	1515.79	16.7753	35.9392	1603.08	11.8818	23.3502	1534.83	29.5638	53.0135
13C_ROV6-5_Grain_46 rim	13C_ROV7-1_Grain_137	23.4335	5527.5	141.188	0.2044	-34.7432	-7.55007	128.637	1.87847	0.0496198	4.51463	0.0762903	11.0669	0.0563147	4.233	0.00872148	1.60351	0.0211052	0.00257203	8.93144	1309.24	118.079	118.079	55.9509	1.78693	2.20927	54.8246	4.58978	4.77921	51.683	9.24992	9.37608
13C_ROV6-5_Grain_47	13C_ROV7-1_Grain_137	1.37735	38443.2	36.3495	0.422758	-234.134	-5.65216	4.41121	0.893166	0.210006	0.737005	0.123065	1.50653	6.7755	0.827285	0.236775	0.830324	0.60104	0.0680871	1.47002	2874.88	23.7945	23.7945	1364.1	20.5482	35.4194	2067.38	14.997	26.8535	1325.1	37.6889	53.484
13C_ROV6-5_Grain_48 core	13C_ROV7-1_Grain_137	-3.43843	11600.5	306.778	1.02354	-77.4084	-5.40326	125.326	0.930766	0.0481135	2.2488	0.319423	2.05434	0.0535322	2.10579	0.00832847	0.920324	0.0317346	0.00247888	1.63103	912.405	63.689	63.689	53.4533	0.979861	1.58137	52.5464	2.16031	2.50113	50.0303	1.63002	2.20115
13C_ROV6-5_Grain_48 rim	13C_ROV7-1_Grain_137	15.5733	5225.15	127.258	0.259256	-32.9325	-6.01534	122.331	1.44247	0.0517006	3.68303	0.104797	6.14278	0.0604052	3.45614	0.00915727	1.33612	0.0707627	0.00331759	5.31226	1320.99	84.0987	84.0987	58.7297	1.56191	2.07286	58.1883	3.96359	4.2066	66.7264	7.09151	7.36164
13C_ROV6-5_Grain_49	13C_ROV7-1_Grain_137	3.64663	6649.15	169.892	0.236722	-46.8486	-5.57943	124.941	1.24914	0.0473443	3.49759	0.0836047	6.48279	0.0534789	3.20256	0.00861418	1.1851	0.0528588	0.00257743	6.00894	1154.46	88.2946	88.2946	55.2696	1.30447	1.82983	52.3633	3.32134	3.55737	51.8595	6.23806	6.42453
13C_ROV6-5_Grain_50-51	13C_ROV7-1_Grain_137	13.9342	5975.04	156.837	0.279465	-40.4884	-5.66164	129.996	1.4459	0.0632429	3.25791	0.12539	7.50527	0.0682199	2.83628	0.00851436	1.21598	0.0678365	0.00328189	4.4324	1326.32	78.4926	78.4926	54.6309	1.32296	1.83275	66.2609	3.69798	4.03005	66.0768	5.85426	6.17205
13C_ROV6-5_Grain_52	13C_ROV7-1_Grain_137	27.1674	4472.2	124.086	0.232593	-31.073	-5.69535	136.856	1.5687	0.0514988	4.6293	0.0909752	8.75174	0.0527461	4.2631	0.00828108	1.37939	-0.00623639	0.00256434	7.31111	1474.41	98.5705	98.5705	53.1344	1.45993	1.9115	51.1087	4.3568	4.53414	51.5172	7.54659	7.69969
13C_ROV6-5_Grain_53	end of signal	6.01366	21352.9	253.791	0.558718	-169.659	-7.55232	58.3255	1.14443	0.0552661	2.3391	0.215924	2.56797	0.133754	2.23946	0.017664	1.13472	0.132723	0.0065609	2.32774	758.797	70.2532	70.2532	112.842	2.53812	3.63892	126.527	5.36402	6.11827	132.116	6.13176	7.26641
13C_ROV6-5_Grain_54	13C_ROV7-1_Grain_137	-0.0858361	6511.7	173.814	0.190676	-42.8	-5.49963	125.994	1.23885	0.0489987	3.29706	0.0546608	8.08245	0.0544177	3.02061	0.00852323	1.16239	0.00782744	0.00211011	7.49366	1165.87	80.6504	80.6504	54.6897	1.26615	1.79322	53.1313	3.16594	3.41782	42.4291	6.37087	6.49395
13C_ROV6-5_Grain_55	13C_ROV7-1_Grain_137	-1.56252	25154.6	168.931	0.406769	-163.836	-5.70362	30.7393	0.803381	0.0533619	1.45497	0.141019	1.85826	0.246603	1.39589	0.0335095	0.787503	0.166375	0.0114064	1.6576	740.232	46.2689	46.2689	212.337	3.2892	5.87608	221.607	5.5947	7.45319	229.01	7.55074	10.1229
13C_ROV6-5_Grain_56	13C_ROV7-1_Grain_137	11.7017	5758.57	155.321	0.187567	-39.2394	-5.38124	130.266	1.18799	0.0503575	3.59899	0.0723637	7.47091	0.0535201	3.39261	0.00826255	1.15605	-0.00966155	0.00272268	6.84269	1278.83	81.3358	81.3358	53.0247	1.22095	1.73398	51.8908	3.47488	3.69574	54.7123	7.50005	7.67351
13C_ROV6-5_Grain_57	13C_ROV7-1_Grain_137	20.337	4341.43	107.35	0.27054	-28.4595	-5.58235	133.999	1.7695	0.0475406	4.41853	0.0872546	8.76632	0.0531912	4.01824	0.00864521	1.37629	0.0856068	0.00216533	7.79223	1368.76	90.2195	90.2195	55.4597	1.52017	1.99224	52.0972	4.18806	4.37947	43.5183	6.79702	6.91856
13C_ROV6-5_Grain_58	13C_ROV7-1_Grain_137	-4.8035	6994.46	74.0502	0.386001	-40.2715	-14.3912	57.7343	3.0184	0.175164	4.86306	0.113274	10.3461	0.41795	3.73712	0.018698	2.80446	0.0321952	0.00497982	9.13234	2505.47	154.57	154.57	119.326	6.63157	7.18172	350.582	23.3071	24.5344	100.17	18.2756	18.514
13C_ROV6-5_Grain_59	13C_ROV7-1_Grain_137	9.18532	4585.94	126.85	0.240206	-28.4246	-8.91369	139.172	2.9703	0.0538003	6.62476	0.0828116	11.7991	0.0542115	6.01471	0.00854493	2.22575	0.0378082	0.00266066	10.531	1452.38	139.911	139.911	54.8159	2.42981	2.74293	52.7361	6.30287	6.43302	53.4709	11.282	11.3929
13C_ROV6-5_Grain_60	13C_ROV7-1_Grain_137	-2.6616	3444.84	91.6354	0.265982	-22.9038	-5.6223	142.281	2.02643	0.0533618	5.86272	0.108194	10.8258	0.0549408	4.92256	0.00850519	1.5972	-0.0316531	0.00237449	9.2132	1719.25	111.476	111.476	54.5551	1.73568	2.14884	52.2958	5.18134	5.34029	47.5999	8.80368	8.91657
13C_ROV6-5_Grain_61	13C_ROV7-1_Grain_137	31.3053	5101.01	137.819	0.223076	-31.6319	-5.8903	130.065	1.30721	0.0552408	3.80098	0.0823869	8.51837	0.0595565	3.45384	0.00839726	1.22971	0.00401246	0.00265885	6.96032	1411.87	87.9196	87.9196	53.8825	1.31971	1.8185	57.6319	3.93499	4.17656	53.4288	7.44901	7.61558
13C_ROV6-5_Grain_18	13C_ROV7-1_Grain_137	14.5975	3899.74	106.832	0.26816	-22.3098	-6.0754	133.213	1.62244	0.0522055	5.43247	0.0981661	8.49414	0.0519496	4.6179	0.00845478	1.34012	-0.0356261	0.00248635	7.54174	1512.21	103.855	103.855	54.3329	1.45774	1.93213	49.8836	4.63329	4.79448	49.9446	7.54957	7.6936
13C_ROV6-5_Grain_75	13C_ROV7-1_Grain_137	-26.0067	3921.62	109.835	0.192289	-25.4421	-5.62856	136.088	1.72753	0.0524696	5.09807	0.0550941	14.3792	0.0556208	4.49991	0.00855468	1.4663	-0.058718	0.00199289	11.9679	1554.82	104.453	104.453	54.8775	1.60249	2.04725	53.5594	4.8161	4.99239	39.8402	9.60697	9.68016
13C_ROV6-5_Grain_76	13C_ROV7-1_Grain_137	0.167803	122417	155.857	0.359576	-757.568	-5.42899	5.83149	1.83532	0.0944167	0.585878	0.119237	0.949072	2.60191	1.3837	0.19795	1.31086	0.908087	0.0636883	1.21727	1495.16	21.8318	21.8318	1153.44	28.4007	38.0072	1259.73	22.8239	30.5227	1244.18	29.4717	46.3994
13C_ROV6-5_Grain_77	13C_ROV7-1_Grain_137	3.78883	11723.5	111.675	0.224704	-78.9229	-5.41372	44.1189	1.31837	0.0894846	1.8164	0.144647	2.92004	0.303997	1.92804	0.0247393	1.26157	0.476322	0.0152236	2.72119	1496.63	58.8325	58.8325	157.33	3.92118	5.33902	263.886	9.19884	10.9079	304.208	16.4697	18.7485
13C_ROV6-5_Grain_78	13C_ROV7-1_Grain_137	2.2966	3518.32	101.535	0.257704	-21.4918	-5.81517	139.64	1.86945	0.0539347	5.63631	0.0675363	16.9287	0.0532192	4.99161	0.00845511	1.51346	-0.0259597	0.00197416	9.92563	1678.61	110.642	110.642	54.2397	1.63494	2.06373	50.4214	5.06179	5.21287	39.5923	7.8949	7.9822
13C_ROV6-5_Grain_79	13C_ROV7-1_Grain_137	4.0182	7097.05	208.442	0.457927	-45.3588	-6.6464	131.227	1.72825	0.050538	4.52058	0.196621	7.12164	0.0541285	3.86762	0.00860466	1.32396	0.00222906	0.00329518	3.87579	1312.86	97.8663	97.8663	55.2031	1.45578	1.9397	52.1399	3.99499	4.19172	66.3788	5.14246	5.50471
13C_ROV6-5_Grain_80	13C_ROV7-1_Grain_137	12.8689	9317.07	274.127	0.606684	-57.7938	-5.53527	129.952	1.1044	0.0530449	2.53519	0.19604	2.90703	0.057158	2.28877	0.00819799	1.07007	-0.0105883	0.00245512	2.60091	1095.61	68.5973	68.5973	52.6151	1.12133	1.65823	56.1925	2.50334	2.84123	49.5339	2.57422	2.96187
13C_ROV6-5_Grain_81 core	13C_ROV7-1_Grain_137	0.300741	133373	453.268	0.608772	-828.414	-5.24536	14.502	0.538452	0.057003	0.684726	0.179381	0.834499	0.553598	0.680605	0.0698744	0.533157	0.39256	0.0207677	0.800647	550.794	25.3168	25.3168	435.125	4.48411	10.7814	445.836	4.9566	10.2289	415.274	6.57948	13.8286
13C_ROV6-5_Grain_81 rim	13C_ROV7-1_Grain_137	3.74102	5112.05	140.593	0.208907	-30.3734	-5.74278	132.08	1.43915	0.048471	3.88213	0.0853948	7.14963	0.0537669	3.59548	0.00846418	1.29608	0.0190862	0.00267994	6.65957	1362.96	93.9759	93.9759	54.3072	1.4019	1.88557	52.2121	3.70911	3.9197	53.8708	7.18564	7.36099
13C_ROV6-5_Grain_82	13C_ROV7-1_Grain_137	0.216207	107442	172.399	0.280865	-654.421	-7.00036	10.9059	1.64078	0.104718	0.691276	0.117862	1.23712	1.58286	1.64352	0.108099	1.56299	0.928902	0.0437618	1.51362	1687.64	25.351	25.351	656.47	19.571	24.4159	926.715	20.7623	25.9234	862.856	25.6761	35.9128
13C_ROV6-5_Grain_83	13C_ROV7-1_Grain_137	19.7584	4249.94	102.151	0.180613	-26.4039	-5.47637	131.391	1.51675	0.0478938	4.65205	0.0531462	12.0286	0.0524527	4.33777	0.00859556	1.38458	-0.0488778	0.00218884	10.8652	1534.79	102.611	102.611	55.1423	1.52046	1.98764	50.5272	4.35796	4.5294	43.7945	9.57567	9.66411
13C_ROV6-5_Grain_84	13C_ROV7-1_Grain_137	19.0748	6191.4	152.987	0.224371	-34.1474	-5.78709	127.297	1.18686	0.0490289	3.4513	0.0708827	6.81472	0.0556553	3.19796	0.00846274	1.15543	0.0218166	0.00236575	6.41149	1229.64	86.7426	86.7426	54.3035	1.2495	1.775	54.5821	3.46039	3.707	47.9583	6.14776	6.30946
13C_ROV6-5_Grain_85	13C_ROV7-1_Grain_137	23.0008	5295.23	132.608	0.217775	-33.5709	-5.2302	133.443	1.53109	0.0525716	3.9804	0.079091	8.25505	0.0564993	3.54616	0.00848387	1.33178	0.0310939	0.00259821	6.77499	1307.69	88.4834	88.4834	54.4315	1.44363	1.91859	54.9657	3.8589	4.08396	52.6521	7.13358	7.30184
13C_ROV6-5_Grain_86	13C_ROV7-1_Grain_137	38.2817	4217.41	113.385	0.188347	-26.6116	-8.08411	134.912	2.49514	0.0563445	6.18379	0.0665408	17.7005	0.0575035	5.5258	0.00855626	2.0714	-0.0512042	0.00252705	13.5536	1520.99	146.811	146.811	54.8906	2.26446	2.59845	55.3091	6.06023	6.20823	50.634	13.7869	13.8689
13C_ROV6-5_Grain_87	13C_ROV7-1_Grain_137	12.5066	4054.34	107.391	0.188139	-22.4133	-6.05934	133.959	1.60243	0.0473619	4.94696	0.0726572	11.3958	0.0526402	4.43699	0.0084369	1.39447	-0.0163595	0.00254226	9.96731	1529.19	106.898	106.898	54.1289	1.50336	1.95952	50.6201	4.4722	4.64049	51.5083	10.264	10.3766
13C_ROV6-5_Grain_88	13C_ROV7-1_Grain_137	5.64973	5067.43	141.76	0.137908	-30.709	-7.33637	129.38	1.85828	0.0556303	5.23291	0.0746066	12.398	0.0587525	4.56945	0.00844875	1.75713	-0.0309991	0.0032337	11.5746	1488.29	132.381	132.381	54.3792	1.92421	2.3092	57.1319	5.15274	5.33575	64.7097	15.0388	15.1613
13C_ROV6-5_Grain_89	13C_ROV7-1_Grain_137	-7.14145	5256.51	124.36	0.311228	-31.7084	-5.47743	111.734	1.33211	0.0557202	4.0269	0.108176	6.35398	0.0688949	3.49107	0.00981845	1.22516	-0.0166248	0.00307399	5.13852	1397.89	86.9576	86.9576	62.953	1.53518	2.11912	65.871	4.52319	4.79514	61.8613	6.35895	6.61751
13C_ROV6-5_Grain_106	13C_ROV7-1_Grain_137	31.8953	3752.75	110.329	0.256006	-21.1972	-5.98913	146.669	1.73936	0.0519704	4.96352	0.103268	9.83523	0.0509386	4.54629	0.00797265	1.49531	0.00484336	0.00247562	8.40276	1615.46	105.529	105.529	51.1596	1.52376	1.93213	49.2548	4.48571	4.64663	49.6709	8.371	8.49988
13C_ROV6-5_Grain_107	13C_ROV7-1_Grain_137	13.8054	4867.41	128.217	0.297699	-29.4958	-5.41534	123.517	1.55164	0.0503166	3.94603	0.102595	8.1475	0.0597582	3.69746	0.00909716	1.33485	0.121244	0.00275461	6.1485	1324.72	89.3752	89.3752	58.3462	1.55036	2.05838	58.1626	4.26803	4.4975	55.3987	6.81675	7.01149
13C_ROV6-5_Grain_108	13C_ROV7-1_Grain_137	13.072	4399.27	123.861	0.445192	-24.4225	-5.84632	131.609	1.5086	0.048835	4.28679	0.18906	4.88974	0.0548861	4.03295	0.00852801	1.36846	0.14702	0.002889	4.40003	1402.26	89.0008	89.0008	54.7117	1.49113	1.95886	53.4438	4.28463	4.47906	58.1951	5.11974	5.40166
13C_ROV6-5_Grain_109	13C_ROV7-1_Grain_137	19.8336	7427.68	228.474	0.405589	-44.5256	-7.8126	129.425	1.72735	0.0468595	4.43812	0.138561	5.76873	0.0521955	4.1554	0.00832091	1.65631	0.0779233	0.00261089	4.9319	1129.52	121.51	121.51	53.3974	1.76181	2.15446	51.2531	4.19589	4.37545	52.6457	5.18908	5.41773
13C_ROV6-5_Grain_110 rim	13C_ROV7-1_Grain_137	-32.3676	2951	82.149	0.203099	-15.8499	-6.13696	145.633	2.23502	0.0548628	7.09134	0.0885689	16.7767	0.0551775	5.72583	0.00859929	1.77399	0.0124236	0.00262208	11.9908	1788.7	112.796	112.796	55.1459	1.94831	2.33135	51.4302	5.95513	6.09069	52.2337	12.6396	12.7356
13C_ROV6-5_Grain_110 core	13C_ROV7-1_Grain_137	0.372466	126324	90.6718	1.35107	-695.943	-5.34076	3.09862	0.525115	0.114568	0.572	0.370988	0.624742	5.20518	0.555359	0.326447	0.506804	0.44856	0.0919025	0.61474	1852.96	20.8522	20.8522	1817.64	16.0519	40.2616	1847.42	9.3748	22.7607	1776.45	20.7487	54.0951
13C_ROV6-5_Grain_111 core	13C_ROV7-1_Grain_137	0.368125	154896	573.602	0.905309	-772.965	-6.68971	17.9126	0.543483	0.0539716	0.637916	0.276002	0.658496	0.424346	0.624575	0.0567107	0.550266	0.435163	0.0177658	0.664524	454.785	23.4491	23.4491	355.653	3.82704	8.96569	358.806	3.78319	8.34864	355.85	4.6881	11.4463
13C_ROV6-5_Grain_111 rim	13C_ROV7-1_Grain_137	-9.07174	4231.89	101.15	0.216596	-22.7465	-5.89291	126.75	1.78084	0.0496403	4.83832	0.0771857	11.6098	0.0571684	4.34953	0.00910631	1.43208	0.0433599	0.00254485	8.84504	1562.74	101.913	101.913	58.3996	1.66539	2.14743	54.5048	4.72826	4.91329	51.0149	9.05935	9.18532
13C_ROV6-5_Grain_112	13C_ROV7-1_Grain_137	-3.63804	3806.34	97.653	0.238467	-21.9051	-5.77151	135.09	1.92464	0.0542228	4.96429	0.149721	35.1111	0.0580959	4.47153	0.00872788	1.48118	0.0658294	0.00318243	7.76455	1557.26	103.528	103.528	55.9823	1.65174	2.10199	55.2264	4.93209	5.11488	63.7938	9.92653	10.1053
13C_ROV6-5_Grain_113 core	13C_ROV7-1_Grain_137	0.040343	423080	326.854	0.44007	-2258.54	-5.25113	3.48933	0.522776	0.111872	0.423818	0.13154	1.00649	4.50606	0.507053	0.289591	0.517371	0.641501	0.0855788	0.673087	1821.82	15.3418	15.3418	1636.44	14.962	36.8849	1730.53	8.45005	22.1498	1659.06	21.5755	52.1206
13C_ROV6-5_Grain_113 rim	13C_ROV7-1_Grain_137	12.1972	6761.05	100.17	0.213782	-37.3657	-6.29816	84.9533	2.15233	0.0738003	3.00092	0.094035	7.15973	0.158637	3.02732	0.0151101	1.91275	0.572807	0.00627943	5.0702	1490.44	72.9008	72.9008	96.4951	3.66261	4.28928	143.998	8.31309	8.97166	125.817	12.7624	13.2951
13C_ROV6-5_Grain_114 rim	13C_ROV7-1_Grain_137	39.8388	3068.58	84.4598	0.225686	-16.4501	-6.0446	141.122	2.03028	0.0606829	5.4456	0.0741396	15.3347	0.0615598	4.82743	0.00860462	1.63708	-0.0224557	0.00220672	12.0274	1797.69	105.126	105.126	55.1876	1.79909	2.20865	58.8873	5.71789	5.90018	44.0583	10.6794	10.7599
13C_ROV6-5_Grain_114 core	13C_ROV7-1_Grain_137	0.851921	98355.3	268.707	0.464647	-509.474	-5.44415	11.4598	0.853205	0.0643973	0.72328	0.163579	0.944359	0.804772	0.949466	0.0903295	0.792561	0.672779	0.0322056	0.912774	764.65	27.6164	27.6164	556.995	8.43931	15.0105	593.953	8.79533	14.3832	640.109	11.5023	21.9134
13C_ROV6-5_Grain_115	13C_ROV7-1_Grain_137	30.5058	4330.18	135.05	0.275548	-21.5598	-9.87634	137.181	2.934	0.0541742	6.9225	0.117467	14.3715	0.0560633	6.02388	0.00854297	2.34607	0.0994857	0.00283739	9.23876	1339.09	147.635	147.635	54.8034	2.56122	2.86	54.0064	6.44076	6.57337	57.0833	10.5516	10.6862
13C_ROV6-5_Grain_116	13C_ROV7-1_Grain_137	-0.136929	5042.14	147.984	0.364985	-28.4506	-5.81906	130.614	1.60768	0.053229	4.57539	0.138642	6.24496	0.0594187	3.9871	0.00865881	1.38461	0.0338106	0.00268801	5.71487	1430.17	97.6377	97.6377	55.5461	1.53181	2.00246	56.862	4.47905	4.68689	54.0918	6.18575	6.38985
13C_ROV6-5_Grain_117	13C_ROV7-1_Grain_137	-2.55241	11604.7	330.284	0.556664	-70.3171	-5.19794	119.24	0.973008	0.0528554	2.53105	0.208052	2.53251	0.0618469	2.39281	0.00876959	0.959728	0.0347075	0.00297465	2.43588	1025.21	65.867	65.867	56.2702	1.0753	1.69186	61.1051	2.84077	3.19339	60.1839	2.89868	3.39187
13C_ROV6-5_Grain_118 core	13C_ROV7-1_Grain_137	0.261894	4302.25	126.715	0.262688	-22.2463	-5.94125	131.17	1.56515	0.0467017	4.67384	0.0917748	7.89576	0.0510383	4.31583	0.00860907	1.39779	0.10169	0.00257996	6.80472	1417.46	97.8436	97.8436	55.2279	1.5375	2.00206	49.2475	4.23773	4.40611	51.8628	7.06872	7.23401
13C_ROV6-5_Grain_118 rim	13C_ROV7-1_Grain_137	39.9935	4102.42	118.777	0.180124	-20.658	-6.05637	131.407	1.68081	0.0521281	7.17459	0.072883	12.3858	0.0568128	4.43015	0.00866365	1.42229	0.207242	0.00261996	9.70995	1519.48	99.6891	99.6891	55.5752	1.57432	2.0356	54.1355	4.75041	4.92971	52.4304	10.2367	10.3549
13C_ROV6-5_Grain_119 A	13C_ROV7-1_Grain_137	10.5954	5833.14	168.415	0.384026	-31.0236	-5.55516	128.887	1.24093	0.0485133	4.17834	0.159065	4.58411	0.0521522	3.76185	0.00845047	1.18857	-0.00251814	0.0025285	5.29163	1304.87	91.6037	91.6037	54.2239	1.28346	1.79777	50.1469	3.70927	3.9021	50.9159	5.39398	5.60102
13C_ROV6-5_Grain_119 B	13C_ROV7-1_Grain_137	12.1034	4669.59	127.01	0.362855	-22.75	-5.95674	130.772	1.58005	0.0572565	4.10079	0.151936	5.58035	0.0605199	3.60595	0.00869168	1.36207	0.0748349	0.00292298	5.08827	1431.37	87.318	87.318	55.757	1.51211	1.99034	58.6438	4.20327	4.44057	58.8383	5.98834	6.23656
13C_ROV6-5_Grain_120	13C_ROV7-1_Grain_137	19.9197	3016.86	73.4645	0.232177	-15.5599	-6.02122	150.606	2.16181	0.0529503	6.5262	0.111442	16.9467	0.0495632	5.82825	0.00828294	1.71636	0.0181463	0.00252829	10.7862	1761.12	114.937	114.937	53.1304	1.81604	2.19534	47.7563	5.66082	5.78523	50.5149	10.9636	11.0664
13C_ROV6-5_Grain_121	13C_ROV7-1_Grain_137	-2.1114	7426.3	13.1058	0.401443	-35.7193	-5.6958	9.95913	3.00029	0.0924388	2.2924	0.130552	4.04942	1.71012	2.58508	0.145172	1.94403	0.532974	0.0429791	4.00797	1583.91	68.5229	68.5229	863.635	31.903	37.1996	930.927	34.9287	38.6729	835.748	65.9788	70.3341
13C_ROV6-5_Grain_122 core	13C_ROV7-1_Grain_137	19.007	8793.23	214.562	0.836344	-44.7042	-5.65888	126.418	1.13285	0.050703	2.81341	0.286754	2.46288	0.0568925	2.65878	0.00843368	1.06361	0.0466635	0.00270996	2.02948	1099.94	74.5837	74.5837	54.1211	1.14649	1.70105	55.6364	2.89498	3.18914	54.9431	2.24455	2.77809
13C_ROV6-5_Grain_122 rim	13C_ROV7-1_Grain_137	-2.9404	4848.78	117.747	0.15017	-24.7682	-5.62303	130.998	1.58219	0.0549957	4.11587	0.0526987	11.8869	0.0585598	3.53204	0.00862344	1.30337	0.346562	0.00243654	10.7919	1402.11	93.9374	93.9374	55.3239	1.43618	1.92685	56.4419	3.92995	4.16094	48.7013	10.5797	10.6787
13C_ROV6-5_Grain_123 rim	13C_ROV7-1_Grain_137	3.22723	4152.93	106.914	0.266298	-19.48	-6.05733	137.429	1.6958	0.0532788	4.71955	0.111719	11.2334	0.0547185	4.20805	0.00841609	1.41915	0.0454206	0.0025451	6.85699	1533.97	96.8499	96.8499	53.9949	1.52618	1.9751	52.6812	4.40305	4.58689	51.1622	7.02738	7.18924
13C_ROV6-5_Grain_124 rim	13C_ROV7-1_Grain_137	11.6496	3807.17	96.8425	0.200121	-19.0605	-5.87871	134.127	1.73268	0.0533469	4.9263	0.0586164	13.3742	0.0569216	4.40063	0.00861955	1.46784	0.0196672	0.00219686	11.1582	1570.48	100.577	100.577	55.2916	1.61623	2.06397	54.2453	4.75646	4.93836	43.932	9.86678	9.95321
13C_ROV6-5_Grain_125 core	13C_ROV7-1_Grain_137	-0.496664	64851.8	51.2953	0.670482	-314.518	-5.83829	3.45555	0.650844	0.105363	0.742675	0.186402	1.01212	4.26143	0.720215	0.295074	0.652808	0.395263	0.0830121	0.982269	1686.66	27.6653	27.6653	1661.85	19.1371	39.1682	1674.28	12.0611	23.8498	1609.63	30.499	55.1566
13C_ROV6-5_Grain_126	13C_ROV7-1_Grain_137	6.7116	4300.69	116.835	0.203892	-21.8587	-5.88119	136.199	1.83713	0.051213	4.61675	0.078663	11.1233	0.0538531	3.84966	0.0085231	1.45191	0.0374785	0.0025646	8.9503	1410.74	98.0821	98.0821	54.6765	1.58135	2.02802	52.1253	4.00858	4.20779	51.3991	9.23648	9.36193
13C_ROV6-5_Grain_127	13C_ROV7-1_Grain_137	31.2878	3908.87	107.065	0.351068	-19.4458	-5.87054	134.151	1.71346	0.0514924	4.79222	0.141482	7.68478	0.0532717	4.449	0.00860753	1.47167	0.032875	0.00273887	5.88841	1510.68	98.2892	98.2892	55.2146	1.61809	2.06426	51.1829	4.54619	4.71637	55.0997	6.49423	6.69626
13C_ROV6-5_Grain_128	13C_ROV7-1_Grain_137	-3.81313	4872.86	148.84	0.462951	-21.8811	-8.85451	135.773	2.21397	0.0506989	6.21444	0.151124	7.14496	0.0532022	5.53681	0.00832811	1.9887	0.0743179	0.00234793	6.47357	1363.16	129.383	129.383	53.4351	2.11635	2.45318	51.7936	5.71213	5.85108	47.3237	6.1258	6.28388
13C_ROV6-5_Grain_129 rim	13C_ROV7-1_Grain_137	-9.78227	4256.87	116.656	0.166418	-20.9399	-5.76215	128.45	1.52964	0.048284	4.54356	0.0554755	11.4336	0.0518891	4.19173	0.00877218	1.41535	0.0120703	0.00208802	12.3226	1415.46	95.1213	95.1213	56.2683	1.58564	2.05427	50.1002	4.1839	4.35992	41.694	10.3545	10.429
13C_ROV6-5_Grain_129 core	13C_ROV7-1_Grain_137	3.53031	51989.7	338.453	0.833835	-250.429	-5.44368	27.6424	0.681265	0.065002	0.920425	0.283871	0.92097	0.32976	0.931087	0.0370055	0.681988	0.368736	0.0128631	0.936077	832.894	33.2125	33.2125	234.111	3.13414	6.20704	287.504	4.65071	7.70025	258.233	4.80239	8.98512
13C_ROV6-5_Grain_130	13C_ROV7-1_Grain_137	14.8935	4476.78	122.22	0.288685	-21.0365	-5.91293	132.52	1.71591	0.0552314	4.26641	0.0923675	8.13559	0.0586997	3.91857	0.00871899	1.4021	0.0423269	0.00230554	6.83892	1498.03	93.4316	93.4316	55.9294	1.56164	2.03094	56.7654	4.41701	4.62904	46.3715	6.35156	6.49861
13C_ROV6-5_Grain_131	13C_ROV7-1_Grain_137	19.8201	5167.13	139.066	0.269378	-26.311	-5.46462	125.837	1.38735	0.0672534	3.56427	0.143255	5.70577	0.0758745	3.25856	0.00876226	1.29676	0.0836182	0.00395567	4.90295	1529.73	90.9947	90.9947	56.2105	1.45152	1.95184	72.6928	4.62017	4.93768	79.5316	7.79306	8.14044
13C_ROV6-5_Grain_132	13C_ROV7-1_Grain_137	12.9256	6527.3	146.241	0.200381	-33.0932	-5.49158	122.425	1.22371	0.0467693	3.47345	0.0676261	7.11079	0.0536116	3.16035	0.00878873	1.17278	0.0192904	0.00268111	6.49987	1145.6	84.7223	84.7223	56.3846	1.31678	1.85666	52.1153	3.24035	3.47661	53.9046	7.0179	7.19757
13C_ROV6-5_Grain_133	13C_ROV7-1_Grain_137	40.4788	3790.42	89.2912	0.307066	-16.4326	-6.34502	139.225	1.91498	0.0576987	5.22046	0.11392	8.50395	0.0582108	4.28659	0.00848856	1.48754	-0.0293289	0.0025327	7.03552	1571.34	100.063	100.063	54.4544	1.61349	2.04995	55.7596	4.7685	4.96051	50.903	7.17543	7.3325
13C_ROV6-5_Grain_134 rim	end of signal	0.0797973	40783.3	197.592	0.884296	-182.323	-9.88165	26.5521	0.895828	0.0524764	1.753	0.309128	1.67667	0.27611	1.71061	0.0381852	0.910603	0.233367	0.013717	1.44606	568.412	59.0605	59.0605	241.49	4.31755	7.01386	245.965	7.47824	9.2073	275.276	7.90899	11.3176
13C_ROV6-5_Grain_135 rim	13C_ROV7-1_Grain_137	19.2808	3667.2	86.9305	0.21807	-17.669	-5.78081	138.894	2.06144	0.0524621	5.11182	0.0825242	15.263	0.0546171	4.75289	0.00861487	1.53041	-0.0232937	0.00262575	9.15189	1558.47	100.726	100.726	55.2586	1.68408	2.11704	52.9963	5.03609	5.20164	53.1732	9.7282	9.85461
13C_ROV6-5_Grain_136 rim	13C_ROV7-1_Grain_137	31.4964	4989.17	118.683	0.271578	-21.5283	-6.25811	127.944	1.47096	0.0544063	3.75469	0.0975224	7.10931	0.0599701	3.34442	0.00877205	1.33987	-0.0313356	0.00263486	6.04535	1333.11	88.5522	88.5522	56.271	1.50109	1.98974	58.1027	3.84362	4.09478	53.0076	6.41587	6.60538
13C_ROV6-5_Grain_137	13C_ROV7-1_Grain_137	7.30332	11280.1	272.782	0.730156	-52.96	-5.64678	119.212	0.960414	0.0660004	2.42613	0.34146	19.3417	0.0766561	2.15879	0.00888326	0.965546	0.0676029	0.00331597	2.16204	1187.83	67.9847	67.9847	56.996	1.0954	1.71727	74.1729	3.07338	3.53629	66.876	2.88594	3.49743
13C_ROV6-5_Grain_138	13C_ROV7-1_Grain_137	13.9866	4694.44	118.493	0.233739	-18.6321	-6.56097	129.494	1.41269	0.0488077	4.30772	0.0805682	8.40087	0.0518502	3.9636	0.00849884	1.2958	-0.00119381	0.00233461	7.61675	1323.64	87.2514	87.2514	54.5286	1.40733	1.89306	50.2112	3.97175	4.15819	47.3659	7.21337	7.34831
13C_ROV6-5_Grain_139 core	13C_ROV7-1_Grain_137	0.544809	130553	595.244	1.37127	-600.011	-5.964	21.6541	0.512312	0.051853	0.719707	0.449115	0.774235	0.3362	0.731405	0.0467315	0.5202	0.359187	0.0156781	1.14921	424.01	26.4231	26.4231	294.516	2.96941	7.28733	293.299	3.72636	7.28486	314.248	7.1583	11.6723
13C_ROV6-5_Grain_139 rim	13C_ROV7-1_Grain_137	-26.9835	6312.58	172.84	0.15282	-30.0084	-11.5336	124.035	2.5808	0.0453706	8.07548	0.0423815	20.6133	0.050618	7.51604	0.00891024	2.50959	0.00130436	0.00212898	19.3518	1168.21	175.398	175.398	57.16	2.85565	3.14872	49.1105	7.29757	7.39443	42.7199	16.5916	16.6401
13C_ROV6-5_Grain_140	13C_ROV7-1_Grain_137	-7.5631	10953.1	284.704	0.331825	-46.595	-6.30598	123.968	0.978259	0.0461919	2.73256	0.101867	3.95509	0.0515457	2.45158	0.00845457	0.949599	0.058914	0.00252471	3.73832	988.089	72.1028	72.1028	54.2582	1.02616	1.62485	50.5206	2.43742	2.72639	50.903	3.80386	4.09118
13C_ROV6-5_Grain_141	13C_ROV7-1_Grain_137	16.5391	5693.44	163.777	0.494552	-28.2484	-9.24647	131.648	2.38067	0.0588591	5.67138	0.200061	6.45802	0.0637696	5.30217	0.00848719	2.25693	0.0602585	0.00307933	5.60464	1351.31	146.823	146.823	54.4536	2.44733	2.75453	62.1803	6.49959	6.67181	62.0737	6.95141	7.18974
13C_ROV6-5_Grain_145	13C_ROV7-1_Grain_137	6.14718	15144.3	405.425	0.183479	-62.876	-6.24387	122.504	0.786107	0.0465694	2.00805	0.0566672	4.91627	0.0530493	1.88485	0.00840168	0.788232	0.0667902	0.00245761	4.08364	793.152	55.2559	55.2559	53.9247	0.846535	1.51135	52.4032	1.92232	2.29467	49.8027	4.07515	4.33458
13C_ROV6-5_Grain_146	end of signal	0.450553	261598	485.001	0.789118	-825.902	-16.9621	8.98259	0.784912	0.0645394	0.975079	0.233555	1.08116	1.00834	0.969436	0.11165	0.795358	0.413651	0.034663	0.953899	747.087	42.2648	42.2648	682.07	10.2913	18.2605	707.922	10.1868	16.4454	688.62	12.9234	23.8566
13C_ROV6-5_Grain_147 core	end of signal	-5.9905	32391.6	407.956	0.194108	-155.688	-10.5125	61.0107	1.03893	0.0515009	2.33196	0.0523905	4.90547	0.118733	2.32814	0.0166076	1.038	0.206417	0.00451152	4.58994	601.944	67.8114	67.8114	106.163	2.18586	3.28709	113.342	5.00721	5.6617	90.9021	8.3282	8.75052
13C_ROV6-5_Grain_147 rim	13C_ROV7-1_Grain_137	4.80044	3909.8	93.8885	0.275175	-17.0092	-6.08775	132.117	1.76705	0.0496211	5.08618	0.108164	10.4029	0.0543118	4.6918	0.00880868	1.47003	0.0202433	0.0026967	7.3568	1537.24	103.468	103.468	56.4985	1.65402	2.11101	52.4927	4.90839	5.0739	54.1559	7.98396	8.14395
13C_ROV6-5_Grain_148	13C_ROV7-1_Grain_137	14.5096	6235.51	164.396	0.528969	-28.8635	-5.84233	132.626	1.25409	0.0489691	3.69545	0.179363	4.15008	0.0523615	3.37738	0.00818285	1.18407	0.0727323	0.00249156	3.75153	1211.72	85.4418	85.4418	52.5145	1.23862	1.7382	50.8269	3.38766	3.60485	50.2359	3.76651	4.04907
13C_ROV6-5_Grain_149	13C_ROV7-1_Grain_137	1.41402	4745.98	119.248	0.329408	-22.1545	-5.59355	132.069	1.48303	0.0510198	3.7805	0.115558	6.54687	0.0541798	3.57038	0.00849042	1.35276	-0.00367995	0.00244184	5.66889	1368.47	86.7815	86.7815	54.4725	1.46755	1.93732	52.392	3.69054	3.90295	49.1599	5.57693	5.7639
13C_ROV6-5_Grain_150 rim	13C_ROV7-1_Grain_137	1.01685	5539.79	137.238	0.162735	-27.6781	-5.16698	125.387	1.24807	0.0517743	3.68721	0.0515159	9.49432	0.0572963	3.44421	0.00865714	1.22694	-0.000532424	0.00235626	9.32025	1322.81	85.4232	85.4232	55.5423	1.35679	1.87159	55.5704	3.78017	4.01349	47.2307	8.83796	8.94872
13C_ROV6-5_Grain_151 core	13C_ROV7-1_Grain_137	-4.80634	10736.2	276.531	0.768913	-49.9199	-5.6848	127.037	1.07728	0.0455688	2.71008	0.264095	2.47138	0.0509261	2.49021	0.0083403	1.02372	0.0908188	0.00262428	2.2171	932.073	72.6664	72.6664	53.5259	1.09137	1.65401	50.0641	2.4581	2.741	52.9492	2.34539	2.82002
13C_ROV6-5_Grain_151 rim	13C_ROV7-1_Grain_137	17.8265	5642.54	146.313	0.18548	-26.5222	-5.60471	132.356	1.41742	0.0519639	3.83333	0.0711374	7.95965	0.0537892	3.4135	0.00834867	1.30795	-0.00564442	0.00277625	6.8928	1283.65	91.7299	91.7299	53.5691	1.3955	1.86938	52.3325	3.53163	3.75343	55.7789	7.70331	7.87892
13C_ROV6-5_Grain_152 core	13C_ROV7-1_Grain_137	-2.53641	8058.06	122.173	0.537042	-36.3164	-5.60162	74.3367	1.11628	0.0493357	2.77675	0.183354	3.27316	0.094026	2.63762	0.0143602	1.08316	0.0781003	0.00463653	2.90655	1069.96	73.2927	73.2927	91.8606	1.9761	2.90317	89.9827	4.62422	5.1013	93.3718	5.41832	6.08044
13C_ROV6-5_Grain_153	13C_ROV7-1_Grain_137	4.18794	9557.3	247.268	0.64215	-46.1422	-5.12907	125.387	0.997642	0.0497847	2.45138	0.216337	2.61411	0.0563945	2.32979	0.00838915	0.96662	0.103964	0.00270062	2.1709	1006.68	66.8083	66.8083	53.8397	1.0365	1.62389	55.3036	2.52581	2.85553	54.4877	2.36289	2.85985
13C_ROV6-5_Grain_154 core	13C_ROV7-1_Grain_137	1.61818	66183.1	460.688	0.215865	-250.103	-10.5524	32.7104	0.89337	0.0597469	1.42386	0.0828199	2.99789	0.255636	1.43314	0.0308662	0.900038	0.333878	0.0116993	2.52698	663.532	52.5456	52.5456	195.912	3.47435	5.68527	230.126	5.89875	7.76959	234.892	11.7982	13.6732
13C_ROV6-5_Grain_154 rim	13C_ROV7-1_Grain_137	26.8633	3342.11	89.3833	0.242346	-13.2878	-6.58015	149.121	2.24087	0.0544579	5.26397	0.12032	10.9278	0.0556601	4.66187	0.00825379	1.5925	0.0766465	0.00285793	8.43342	1629.16	105.037	105.037	52.9505	1.67976	2.08175	53.1575	4.95563	5.12485	57.2738	9.6909	9.83903
13C_ROV6-5_Grain_155 core	13C_ROV7-1_Grain_137	3.41168	7659.25	179.236	0.539588	-31.8248	-8.47744	121.423	1.56732	0.0697252	3.60456	0.23498	4.33313	0.0845625	3.4451	0.00875335	1.52211	0.115543	0.00368894	3.99404	1359.54	107.25	107.25	56.1641	1.70241	2.14438	81.2564	5.41969	5.75405	74.3545	5.9301	6.32421
13C_ROV6-5_Grain_155 rim	13C_ROV7-1_Grain_137	4.41514	9918.3	254.441	0.132125	-42.0367	-5.78367	123.877	1.02832	0.0477834	2.48448	0.0443017	7.06934	0.0545357	2.26495	0.00852176	0.968423	0.105336	0.00249377	6.36184	989.814	71.4092	71.4092	54.6869	1.05487	1.65083	53.4303	2.37181	2.6983	50.5585	6.43299	6.6048
13C_ROV6-5_Grain_156 core	13C_ROV7-1_Grain_137	-0.262837	149338	193.185	0.600758	-618.08	-6.18847	6.04461	0.583706	0.0746753	0.611752	0.175397	0.762573	1.73249	0.624939	0.168211	0.572944	0.488062	0.0501664	0.747632	1033.98	24.7772	24.7772	1000.89	10.6332	24.107	1016.69	8.13802	17.9495	988.562	14.4192	31.9815
13C_ROV6-5_Grain_156 rim	13C_ROV7-1_Grain_137	-12.9233	3279.57	79.9238	0.2137	-17.6114	-21.1145	141.895	2.30613	0.0532376	6.09008	0.0776212	15.4733	0.0539415	5.26147	0.00873397	1.737	0.0685731	0.00232593	12.2191	1635.81	116.625	116.625	56.0123	1.93721	2.33306	52.0391	5.51443	5.66279	46.4451	11.4318	11.5153
13C_ROV6-5_Grain_157	13C_ROV7-1_Grain_137	-10.5181	5892.31	142.154	0.260597	-26.4042	-5.51896	132.082	1.34574	0.0494755	3.71943	0.0989249	8.1797	0.051459	3.39579	0.00823409	1.19825	-0.0589399	0.00257103	5.78473	1265.22	83.5948	83.5948	52.9204	1.27007	1.77198	50.3552	3.39575	3.61118	51.7434	5.98839	6.18131
13C_ROV6-5_Grain_158 core	13C_ROV7-1_Grain_137	0.0149725	252462	160.857	1.41009	-1033.01	-5.65949	3.26243	0.55501	0.112428	0.456207	0.381855	0.535374	4.83595	0.54177	0.311615	0.561145	0.648614	0.0860271	0.574649	1825.74	16.7931	16.7931	1744.67	17.0901	39.4034	1786.28	9.14551	22.6673	1666.58	18.3557	50.7175
13C_ROV6-5_Grain_158 rim	13C_ROV7-1_Grain_137	34.7486	3722.6	87.5969	0.180424	-16.1145	-5.99487	141.173	2.07544	0.0530674	5.49055	0.0799156	18.1457	0.0517328	4.82286	0.00832512	1.4863	0.0221227	0.00282442	10.2065	1616.48	112.252	112.252	53.4109	1.58154	2.01	50.3465	4.8685	5.024	56.4236	11.5845	11.7057
13C_ROV6-5_Grain_159 rim	13C_ROV7-1_Grain_137	9.96965	4499.38	76.3867	0.258598	-19.5402	-6.10874	101.107	1.7914	0.0685441	3.87323	0.119529	7.24585	0.0979587	3.38555	0.0115915	1.49383	0.0945557	0.00452662	5.82952	1683.62	92.5461	92.5461	74.2278	2.20507	2.79708	92.3789	6.12983	6.52101	91.4867	10.6725	11.0111
13C_ROV6-5_Grain_160	13C_ROV7-1_Grain_137	-13.72	4910.78	113.667	0.320461	-20.7372	-5.91265	130.225	1.45604	0.0488245	4.24556	0.112799	6.78473	0.0512686	3.83937	0.00854972	1.32544	0.0472621	0.00250493	5.74468	1374.13	93.9893	93.9893	54.8523	1.4479	1.92827	49.9914	3.81705	4.00774	50.4212	5.79506	5.98433
13C_ROV6-5_Grain_161	13C_ROV7-1_Grain_137	23.2598	7226.63	87.6294	0.397858	-31.0068	-5.78158	65.2503	1.15576	0.0516995	3.26158	0.221118	3.26995	0.110303	2.97138	0.0164277	1.11967	0.0353626	0.00834541	2.74695	1174.05	79.2024	79.2024	104.967	2.33217	3.36678	103.237	5.96197	6.45155	167.622	9.17616	10.4235
13C_ROV6-5_Grain_162 rim	13C_ROV7-1_Grain_137	40.0338	4772.09	112.349	0.250369	-19.7287	-6.12604	132.669	1.44134	0.0477068	4.17362	0.0882978	7.80754	0.0521201	3.75522	0.00841955	1.33785	0.0551199	0.00250593	6.68258	1345.24	90.8887	90.8887	54.1033	1.44772	1.92025	50.3675	3.75115	3.94683	50.3895	6.74439	6.90785
13C_ROV6-5_Grain_163 rim	13C_ROV7-1_Grain_137	11.299	6028.36	122.995	0.225228	-26.4102	-5.65184	113.992	1.43869	0.0509461	3.51176	0.106612	5.57271	0.0654146	3.27794	0.00975012	1.33254	0.1152	0.00393034	5.17572	1246.4	79.6231	79.6231	62.5115	1.65731	2.20204	63.1369	4.08099	4.35824	78.9946	8.17619	8.50396
13C_ROV6-5_Grain_164	13C_ROV7-1_Grain_137	2.03233	6907.24	159.42	0.347933	-28.1309	-5.83414	126.409	1.35018	0.0495322	3.25777	0.123966	6.15603	0.0566657	2.98924	0.00866818	1.1224	0.000932294	0.00265173	4.03306	1191.58	77.4852	77.4852	55.6168	1.24311	1.79234	55.0574	3.23739	3.50018	53.7071	4.33628	4.61909
13C_ROV6-5_Grain_165 rim	13C_ROV7-1_Grain_137	27.9868	4572.81	108.688	0.234206	-18.9946	-5.87696	132.684	1.52199	0.048449	4.33116	0.0741411	8.45243	0.0516801	3.94038	0.00852913	1.34623	-0.0113296	0.00239028	7.58034	1409.49	95.425	95.425	54.7199	1.46717	1.94082	50.0635	3.92156	4.10777	48.0239	7.29683	7.43463
13C_ROV6-5_Grain_166 rim	13C_ROV7-1_Grain_137	4.46476	26719.8	647.036	1.02222	-110.347	-5.92526	120.97	0.694261	0.0465601	1.45397	0.36936	1.26283	0.0544171	1.39367	0.00848546	0.701376	0.181155	0.00303081	1.33413	596.725	43.2041	43.2041	54.4621	0.760663	1.47552	53.7044	1.46847	1.95764	61.1552	1.62907	2.4332
13C_ROV6-5_Grain_105	13C_ROV7-1_Grain_137	10.0666	8948.17	211.398	0.48679	-33.1597	-6.34547	122.018	1.107	0.0740721	2.51086	0.23007	2.68092	0.0871059	2.4408	0.008728	1.07246	0.115819	0.00385457	2.41132	1432.85	71.7036	71.7036	56.0008	1.19594	1.76644	84.1446	4.00583	4.48473	77.6989	3.74104	4.38962
13C_ROV6-5_Grain_91	13C_ROV7-1_Grain_137	2.39544	6218.07	152.384	0.957103	-23.8663	-6.2108	128.643	1.23146	0.0648317	2.84163	0.354743	2.693	0.0727813	2.61577	0.00844258	1.1883	0.0190595	0.00284619	2.24373	1415.1	77.8108	77.8108	54.1735	1.28191	1.79581	70.6373	3.58053	3.95584	57.4174	2.57342	3.08293
13C_ROV6-5_Grain_90	13C_ROV7-1_Grain_137	24.5492	6977.56	170.494	0.280414	-28.4007	-5.81439	127.332	1.18264	0.0509117	3.07701	0.0889905	5.81179	0.0552889	2.812	0.00846632	1.15008	-0.0120072	0.00232521	5.07036	1196.89	75.1197	75.1197	54.3266	1.24415	1.77156	54.0406	2.99358	3.26686	46.8451	4.75098	4.94928
13C_ROV6-5_Grain_74	13C_ROV7-1_Grain_137	7.82882	9951.66	251.507	0.645009	-41.1657	-5.93447	127.273	1.11644	0.0472823	2.92823	0.236394	2.83859	0.0512269	2.6849	0.00835423	1.06627	0.048024	0.00254933	2.45265	996.86	70.1682	70.1682	53.6135	1.13867	1.68715	50.4393	2.68534	2.95316	51.4345	2.52093	2.94442
13C_ROV6-5_Grain_62	13C_ROV7-1_Grain_137	-13.7962	5857.36	154.556	0.246083	-22.0128	-6.33924	136.157	1.28152	0.0541136	3.58642	0.087321	6.42194	0.0551322	3.34983	0.00800266	1.22795	0.0595329	0.0023239	6.21061	1320.25	81.2345	81.2345	51.3617	1.25642	1.73246	53.4116	3.53024	3.7602	46.77	5.81577	5.97866
13C_ROV6-5_Grain_27	13C_ROV7-1_Grain_137	6.70065	7700.52	187.002	0.726055	-32.688	-5.60871	125.644	1.21178	0.0610253	2.62858	0.285928	3.204	0.0707071	2.50831	0.00861244	1.04241	0.105639	0.00315374	2.26424	1211.87	69.648	69.648	55.3334	1.15463	1.73224	68.7931	3.38301	3.76706	63.7879	2.8968	3.46083
13C_ROV6-5_Grain_10 A	13C_ROV7-1_Grain_137	-12.0577	7555.04	181.985	0.201685	-32.209	-6.90975	123.338	1.16395	0.0472438	3.32797	0.0694611	6.04841	0.0548712	3.10423	0.00868325	1.11508	0.741775	0.00263604	5.67006	1178.04	81.8876	81.8876	55.7134	1.23728	1.79001	53.3306	3.23188	3.47583	53.053	6.01937	6.22109
13C_ROV6-5_Grain_10 B	13C_ROV7-1_Grain_137	-5.61214	10270.9	260.812	0.832967	-42.2654	-5.77662	127.596	1.03964	0.0536065	2.45959	0.285515	2.11837	0.059194	2.26901	0.00830738	1.02304	0.0804711	0.00268361	1.73335	1044.18	67.9396	67.9396	53.3156	1.08637	1.64705	58.155	2.59697	2.94981	54.1539	1.87503	2.46564
13C_ROV6-5_Grain_11	13C_ROV7-1_Grain_137	6.00582	9138.94	231.803	0.577677	-32.294	-6.66659	128.43	1.15351	0.0527709	2.69126	0.207625	2.80013	0.0584914	2.4787	0.00830747	1.12665	0.0943954	0.00275909	2.43195	1109.75	73.651	73.651	53.3127	1.19636	1.72155	57.5388	2.81169	3.13815	55.6588	2.7036	3.16497
13C_ROV6-5_Grain_12	13C_ROV7-1_Grain_137	-7.54584	4576.63	116.229	0.310288	-19.7568	-5.88848	137.391	1.58707	0.0545792	4.18343	0.114847	6.79637	0.0560932	3.86841	0.00820361	1.34287	0.051227	0.00252542	5.9843	1472.84	87.36	87.36	52.6412	1.40824	1.86487	54.8747	4.22838	4.43653	50.8193	6.08678	6.2702
13C_ROV6-5_Grain_13	13C_ROV7-1_Grain_137	21.4477	4223.73	104.228	0.223013	-17.0487	-6.19483	133.787	1.62627	0.0511814	4.64	0.0902925	8.91531	0.0535509	4.12876	0.00848585	1.45568	0.0383878	0.00274964	7.8082	1474.91	98.5705	98.5705	54.4386	1.57836	2.02213	51.9095	4.27643	4.46176	55.1761	8.64137	8.79527
13C_ROV6-5_Grain_14	13C_ROV7-1_Grain_137	-4.76268	4788.89	110.973	0.195879	-21.0546	-5.53119	125.767	1.50624	0.0493893	4.24191	0.0754453	8.66839	0.0537553	3.76028	0.00889443	1.3479	0.0154499	0.00279445	7.82146	1359.94	92.2278	92.2278	57.0518	1.53135	2.02465	52.348	3.92654	4.13083	56.067	8.79531	8.95142
13C_ROV6-5_Grain_15 A	13C_ROV7-1_Grain_137	35.6266	6110.9	144.752	0.41715	-24.1552	-6.83253	130.929	1.53397	0.0470336	4.66077	0.193877	5.60094	0.0523579	4.12741	0.00848692	1.27672	0.0585776	0.00245534	5.95727	1250.08	90.8016	90.8016	54.4533	1.38463	1.87503	50.5754	4.18488	4.36636	49.4162	5.89652	6.07579
13C_ROV6-5_Grain_15 B	13C_ROV7-1_Grain_137	36.6099	3993.31	98.9544	0.416312	-15.3761	-6.4275	138.023	1.76505	0.063893	4.13828	0.171138	14.6354	0.0659155	3.69081	0.00842788	1.43416	0.0194658	0.0034527	4.36199	1635.2	95.0725	95.0725	54.0695	1.54455	1.99047	63.264	4.61162	4.86043	69.507	6.05864	6.39794
13C_ROV6-5_Grain_16	13C_ROV7-1_Grain_137	22.8927	10488.2	259.904	0.6442	-42.4389	-5.75407	125.834	1.01711	0.0497916	2.42842	0.216368	2.4144	0.0565092	2.26286	0.00837398	0.951155	0.0581374	0.00263256	2.03114	1007.42	68.5442	68.5442	53.7433	1.01824	1.61069	55.5786	2.47547	2.81682	53.1199	2.15525	2.66681
13C_ROV6-5_Grain_19	13C_ROV7-1_Grain_137	-5.85632	5713.24	139.776	0.470225	-21.5653	-6.32645	127.844	1.46388	0.0624294	3.47679	0.221565	5.26432	0.0699307	3.09995	0.00871627	1.27115	0.0822004	0.00330797	3.44522	1418.63	87.9315	87.9315	55.9179	1.41545	1.92059	67.1947	4.06464	4.37225	66.6598	4.58761	4.99308
13C_ROV6-5_Grain_20	13C_ROV7-1_Grain_137	2.73204	13187.6	319.083	0.435358	-55.7385	-5.45485	119.993	0.815221	0.0672019	1.782	0.200197	2.21607	0.0803489	1.73391	0.00862443	0.807386	0.143407	0.00387325	1.98002	1101.72	54.7531	54.7531	55.3475	0.889932	1.56306	77.8854	2.60188	3.18889	78.0945	3.08699	3.85419
13C_ROV6-5_Grain_21	13C_ROV7-1_Grain_137	30.9104	4041.59	98.1686	0.251238	-15.2849	-6.18845	134.864	1.63572	0.0528373	4.37307	0.0985684	9.76129	0.0576447	3.90613	0.00841232	1.41521	0.0773872	0.0025966	7.49517	1503.9	97.5446	97.5446	54.0635	1.53133	1.98399	55.5624	4.31106	4.51929	52.1486	7.83556	7.98688
13C_ROV6-5_Grain_22	13C_ROV7-1_Grain_137	9.43134	5092.92	117.723	0.192343	-20.9598	-5.65486	127.036	1.50163	0.0505581	4.0782	0.0609052	8.82211	0.0544966	3.6259	0.00884283	1.31687	-0.0299595	0.00229763	8.58668	1325.88	89.6505	89.6505	56.7239	1.48759	1.98675	52.873	3.79643	4.00847	46.6115	8.00104	8.11904
13C_ROV6-5_Grain_23-24	13C_ROV7-1_Grain_137	19.4135	9539.83	226.795	0.572601	-36.939	-6.00361	123.482	1.04287	0.0853053	2.35372	0.381922	26.9157	0.0983234	2.20161	0.00860263	1.03884	0.0751947	0.0040293	2.28205	1499.87	69.6866	69.6866	55.2012	1.14196	1.71648	93.8728	3.94297	4.51541	81.2181	3.69894	4.40887
13C_ROV6-5_Grain_25 A	13C_ROV7-1_Grain_137	11.564	4344.71	96.9512	0.203071	-16.5837	-6.20994	124.802	1.5981	0.0905911	4.03643	0.204235	5.97804	0.105771	4.10416	0.00903518	1.3356	0.266104	0.00783756	5.3936	1947.36	98.5873	98.5873	57.9506	1.54122	2.04575	96.9839	7.55584	7.88716	156.561	16.8345	17.4569
13C_ROV6-5_Grain_25 B	13C_ROV7-1_Grain_137	7.71253	3889.03	89.32	0.212415	-16.5268	-5.72637	137.462	2.14981	0.0516198	5.43451	0.0707095	15.3237	0.0540611	4.54921	0.00882626	1.5607	0.0457636	0.00238971	9.94773	1517.27	103.55	103.55	56.708	1.76977	2.209	51.8145	4.71878	4.88785	47.8467	9.56418	9.66948
13C_ROV6-5_Grain_25 C	13C_ROV7-1_Grain_137	0.343096	12608.1	290.95	0.32604	-42.0215	-6.78508	120.793	0.89735	0.048513	2.18405	0.11397	3.06803	0.056267	2.06967	0.00860997	0.899778	0.0514255	0.0027429	2.98872	887.209	61.1083	61.1083	55.2525	0.99007	1.6204	55.1532	2.22624	2.58897	55.3169	3.30309	3.68597
13C_ROV6-5_Grain_26	13C_ROV7-1_Grain_137	4.54818	6000.55	134.892	0.234424	-23.4497	-5.82693	122.937	1.32059	0.0632419	3.21302	0.107432	5.0827	0.0711151	2.82527	0.00889188	1.19881	0.0118951	0.00372388	4.64698	1358.43	85.0976	85.0976	57.0421	1.36173	1.89944	68.5199	3.77203	4.11327	74.9176	6.96205	7.30668
13C_ROV6-5_Grain_63	13C_ROV7-1_Grain_137	1.72452	7539.78	179.882	0.252152	-30.2728	-5.71011	127.821	1.21348	0.0478915	3.00715	0.0866993	5.41818	0.0549191	2.88267	0.0084443	1.1165	0.0565108	0.00260769	5.02982	1131.5	79.6415	79.6415	54.1872	1.20501	1.74216	53.6704	3.04109	3.3058	52.5173	5.28289	5.50688
13C_ROV6-5_Grain_64 A	13C_ROV7-1_Grain_137	1.68861	3755.59	89.1392	0.353847	-14.1815	-6.27265	135.878	1.81099	0.0589678	5.01063	0.13967	8.5633	0.0627563	4.378	0.00846748	1.46754	0.0256871	0.00257294	6.24895	1611.27	103.786	103.786	54.3207	1.58781	2.02783	59.4556	5.19327	5.39391	51.7559	6.47555	6.65472
13C_ROV6-5_Grain_64 B	13C_ROV7-1_Grain_137	12.1281	3258.59	73.8264	0.317986	-13.093	-6.22233	138.794	2.16907	0.0512504	5.80794	0.118049	14.0088	0.0562196	5.12458	0.00886512	1.58783	0.0500844	0.00271467	7.26724	1728.51	111.458	111.458	56.8524	1.79812	2.23073	53.2393	5.50475	5.66075	54.5216	7.93976	8.10277
13C_ROV6-5_Grain_65 A	13C_ROV7-1_Grain_137	12.6942	4544.08	104.702	0.501599	-18.0871	-5.8633	131.945	1.59983	0.0487685	4.42569	0.1887	6.29704	0.0542186	4.03143	0.00858138	1.3196	-0.00380573	0.00269364	4.15947	1405.37	94.8534	94.8534	55.0547	1.44667	1.93035	52.8193	4.24955	4.44253	54.283	4.51308	4.79031
13C_ROV6-5_Grain_65 B	13C_ROV7-1_Grain_137	3.83334	4535.08	109.434	0.412758	-16.8383	-6.22077	137.188	1.57249	0.0494872	4.48415	0.174666	5.56581	0.0536301	4.1276	0.00827255	1.34402	0.0358128	0.002753	4.57232	1451.61	96.2155	96.2155	53.0814	1.42088	1.88092	51.4934	4.22383	4.40699	55.4562	5.07075	5.32982
13C_ROV6-5_Grain_66 A	13C_ROV7-1_Grain_137	8.28574	3937.63	93.3524	0.22399	-14.0008	-6.39174	135.269	1.72413	0.0518778	5.19305	0.101399	9.77265	0.0532471	4.53041	0.00844653	1.46462	-0.0438718	0.00298999	7.7537	1557.27	104.723	104.723	54.1871	1.58068	2.02028	51.0896	4.63885	4.80642	60.5247	9.38664	9.55614
13C_ROV6-5_Grain_66 B	13C_ROV7-1_Grain_137	-16.4096	4104.53	106.161	0.270022	-16.8281	-9.88466	138.464	2.85708	0.0499759	8.14812	0.0932542	15.8415	0.0573624	7.07961	0.00824916	2.33909	0.061014	0.00273142	11.5019	1380.65	171.475	171.475	52.9321	2.46677	2.75616	54.9319	7.71287	7.82815	54.9042	12.6453	12.7496
13C_ROV6-5_Grain_67 A	13C_ROV7-1_Grain_137	-0.381341	6307.19	159.426	0.369451	-25.112	-5.69105	128.671	1.22398	0.0490329	3.26871	0.130209	4.41725	0.0537788	3.0224	0.00839449	1.19129	-0.000796778	0.00270694	4.01452	1190.11	81.703	81.703	53.8663	1.27802	1.78814	52.3467	3.11548	3.36306	54.8198	4.40573	4.69564
13C_ROV6-5_Grain_67 B	13C_ROV7-1_Grain_137	8.04601	8471.71	216.199	0.535034	-27.9796	-7.43322	123.881	1.16982	0.0507866	3.05985	0.188293	3.69208	0.0568583	2.84969	0.00851233	1.1296	0.0508686	0.00279285	3.07467	1056.44	77.3729	77.3729	54.6259	1.229	1.76612	55.509	3.09784	3.3735	56.3308	3.4598	3.83982
13C_ROV6-5_Grain_68 rim	13C_ROV7-1_Grain_137	22.1429	4466.35	104.657	0.365728	-16.7731	-6.29337	127.974	1.82618	0.0889425	3.59194	0.208702	5.82355	0.0963918	2.84565	0.00905929	1.45513	0.025096	0.00433787	4.04485	1685.11	85.8104	85.8104	58.0984	1.68352	2.15718	91.8806	5.0274	5.47599	87.2722	7.05447	7.51196
13C_ROV6-5_Grain_68 core	13C_ROV7-1_Grain_137	45.523	4534.34	117.705	0.712952	-17.8722	-5.80719	140.942	1.82492	0.0517183	4.22476	0.257009	4.68855	0.0534013	3.78128	0.00826549	1.4496	0.0131182	0.00255545	3.28806	1384.35	97.4136	97.4136	53.0319	1.53122	1.96496	51.9607	3.89919	4.09986	51.5356	3.38624	3.71352
13C_ROV6-5_Grain_69 rim	13C_ROV7-1_Grain_137	-2.65811	7087.03	190.681	0.140339	-25.9486	-8.01138	127.853	1.55135	0.0481783	3.93663	0.0569344	9.8633	0.0538096	3.84844	0.00839109	1.53073	0.0470281	0.00283099	9.61941	1097.06	106.065	106.065	53.8461	1.64166	2.06355	52.451	3.96265	4.1597	56.8462	10.9579	11.0869
13C_ROV6-5_Grain_70 A	13C_ROV7-1_Grain_137	19.1362	2887.58	75.5367	0.298218	-10.559	-6.83322	152.001	2.3229	0.0685622	5.68153	0.233238	23.4506	0.0709797	4.59141	0.00811464	1.74425	0.132764	0.00393843	6.84174	1809.66	104.719	104.719	52.0547	1.80929	2.1762	67.1133	6.12426	6.33973	78.9399	10.8175	11.0677
13C_ROV6-5_Grain_70 B	13C_ROV7-1_Grain_137	-6.7118	3516.3	92.4297	0.333216	-12.9886	-6.37812	147.567	2.1289	0.0600141	4.97871	0.152952	12.1925	0.0572298	4.31154	0.00813999	1.53949	-0.0177927	0.00262466	6.72167	1643.18	100.683	100.683	52.2264	1.60189	2.00936	54.8675	4.72928	4.91755	52.7615	7.10057	7.27069
13C_ROV6-5_Grain_71 A	13C_ROV7-1_Grain_137	4.26239	9689.22	251.173	0.871749	-37.6309	-6.03289	126.516	1.15272	0.0491548	2.99929	0.389275	14.4504	0.0538724	2.64879	0.00845904	1.11971	0.00443322	0.00280071	2.31894	1029.94	75.311	75.311	54.2812	1.2103	1.74719	52.6352	2.72111	2.9996	56.4997	2.61568	3.1031
13C_ROV6-5_Grain_71 B	13C_ROV7-1_Grain_137	8.62218	15580.2	390.598	0.931854	-61.4836	-5.93404	121.309	0.876791	0.0525539	1.94464	0.347181	11.2588	0.0613516	1.83694	0.00854471	0.849262	0.101957	0.00278113	1.54899	847.537	58.592	58.592	54.8377	0.927479	1.57517	60.0816	2.14816	2.58438	56.1225	1.73603	2.40118
13C_ROV6-5_Grain_73 A	13C_ROV7-1_Grain_137	-9.27536	6854.56	179.758	0.448827	-25.6119	-8.90863	123.869	1.90843	0.0526121	4.65057	0.162087	5.45916	0.0585565	4.29406	0.00870637	1.84725	0.11569	0.00282924	4.86201	1231.8	120.219	120.219	55.8562	2.05456	2.42949	56.889	4.79708	4.98958	57.0447	5.54264	5.7938
13C_ROV6-5_Grain_73 B	13C_ROV7-1_Grain_137	-6.96246	5418.23	129.091	0.227806	-19.1139	-6.23711	123.781	1.41296	0.056026	3.79539	0.102932	6.29618	0.0624555	3.41876	0.00895256	1.28933	0.015633	0.00347027	5.36624	1402.39	86.2433	86.2433	57.511	1.48309	1.99946	60.5795	4.10475	4.36178	69.7767	7.49153	7.77128
13C_ROV6-5_Grain_72 A	13C_ROV7-1_Grain_137	-1.43204	7694.09	200.935	0.752004	-21.6275	-10.5848	127.863	1.7474	0.0503157	4.00782	0.257194	3.87258	0.057332	3.78064	0.00860807	1.68725	0.0604519	0.00268847	3.35926	1119.12	98.8956	98.8956	55.2313	1.85543	2.25524	55.8961	4.1346	4.34746	54.2394	3.63914	3.97674
13C_ROV6-5_Grain_72 B	13C_ROV7-1_Grain_137	6.53287	4793.82	109.875	0.641002	-18.0483	-6.03426	120.523	1.58695	0.11378	4.38716	0.394856	5.73035	0.145479	4.43425	0.00942957	1.4211	0.333386	0.00491078	4.11279	2077.3	112.061	112.061	60.4622	1.71019	2.21203	130.337	10.7861	11.1925	98.7299	8.09144	8.59949
13C_ROV6-5_Grain_93 core	13C_ROV7-1_Grain_137	-0.670001	12958.4	331.454	0.833386	-48.3101	-5.93158	129.28	0.959528	0.0483586	2.13779	0.265655	2.25565	0.0523788	1.98432	0.00808814	0.947382	0.0266877	0.00248082	1.83361	874.354	61.6817	61.6817	51.9167	0.979693	1.55343	51.6123	2.01081	2.36506	50.0663	1.83393	2.35688
13C_ROV6-5_Grain_94 A	13C_ROV7-1_Grain_137	9.74449	5098.77	121.364	0.367642	-19.0507	-5.89782	131.307	1.55845	0.0455572	4.00768	0.125387	5.9197	0.0514085	3.72623	0.00859522	1.35383	0.0317192	0.00245586	5.11402	1270.41	90.9578	90.9578	55.1415	1.4866	1.9618	49.9371	3.69211	3.88764	49.4666	5.05867	5.26629
13C_ROV6-5_Grain_94 B	13C_ROV7-1_Grain_137	-9.21528	5117.56	120.986	0.333189	-18.0169	-6.2523	127.218	1.44772	0.0495186	3.94987	0.114892	5.87642	0.0548117	3.62409	0.00866406	1.30463	0.00682667	0.00241828	5.59142	1345.39	89.185	89.185	55.6694	1.45335	1.94906	53.3622	3.84334	4.0582	48.6914	5.44834	5.63601
13C_ROV6-5_Grain_95	13C_ROV7-1_Grain_137	11.555	9772.84	239.987	0.538593	-32.0133	-6.83148	122.85	1.07606	0.0588983	2.65488	0.214644	2.80133	0.0676187	2.50473	0.00863483	1.04381	0.0631191	0.00309999	2.57247	1174.22	77.3123	77.3123	55.4067	1.1517	1.72654	65.7438	3.19394	3.5575	62.5161	3.21071	3.70424
13C_ROV6-5_Grain_96 A	13C_ROV7-1_Grain_137	10.5791	7875.02	194.433	0.700024	-30.0229	-5.82432	124.665	1.06972	0.0503218	2.90051	0.242232	2.87486	0.0570903	2.71988	0.00847575	1.02182	0.0131113	0.0026885	2.47653	1053.75	72.8858	72.8858	54.3913	1.10699	1.67944	55.7838	2.98816	3.2789	54.2365	2.68352	3.12629
13C_ROV6-5_Grain_96 B	13C_ROV7-1_Grain_137	14.0766	12111	320.7	0.968464	-41.8107	-9.03429	122.354	1.28242	0.0506493	3.07368	0.3191	2.75562	0.0587155	2.91573	0.00851312	1.24878	0.0438705	0.00268847	2.30925	950.491	86.9968	86.9968	54.6347	1.35858	1.85857	57.486	3.27353	3.5523	54.2539	2.5024	2.97231
13C_ROV6-5_Grain_97 A	13C_ROV7-1_Grain_137	1.75524	8937.2	224.545	0.913389	-32.197	-6.03909	125.407	1.03575	0.0496005	2.65287	0.305377	2.24684	0.0556133	2.44656	0.00847856	0.982378	0.0524861	0.00266071	1.81972	1003.76	70.6809	70.6809	54.4104	1.06446	1.6519	54.517	2.6177	2.92925	53.6909	1.95152	2.51557
13C_ROV6-5_Grain_97 B	13C_ROV7-1_Grain_137	2.75583	10321.3	265.433	0.918348	-37.4962	-5.90444	124.947	0.928841	0.0466411	2.46585	0.304416	2.19118	0.05224	2.3016	0.00840145	0.889497	0.0296448	0.0026499	1.78451	921.371	65.6237	65.6237	53.9206	0.955324	1.57489	51.3778	2.32312	2.63341	53.4738	1.90623	2.47661
13C_ROV6-5_Grain_97 C	13C_ROV7-1_Grain_137	-6.11921	12645.2	333.307	0.946194	-46.5961	-5.69223	126.776	0.890963	0.0504464	1.98637	0.32003	1.8435	0.0560018	1.86833	0.00822142	0.88822	0.0844196	0.00268153	1.50154	837.188	56.8332	56.8332	52.7701	0.933572	1.54044	54.9803	2.00342	2.3978	54.1157	1.623	2.27898
13C_ROV6-5_Grain_98	common lead	23.4819	8160.69	155.584	0.509167	-27.2662	-6.82084	92.6988	1.4604	0.304282	2.41125	0.822429	2.60783	0.544497	2.53915	0.0120059	1.31121	0.554312	0.0203785	2.83826	3270.82	85.4752	85.4752	76.8803	2.0044	2.68202	412.492	18.6251	20.6909	405.531	22.7772	25.6883
13C_ROV6-5_Grain_99	13C_ROV7-1_Grain_137	2.92746	15667.9	414.689	0.906371	-58.9536	-5.80835	126.221	0.877678	0.0502649	1.8671	0.287371	1.65862	0.0565225	1.75375	0.00828305	0.869843	0.0908717	0.00254752	1.44919	864.454	55.7513	55.7513	53.1645	0.920944	1.54	55.5168	1.89716	2.31641	51.4159	1.48837	2.12746
13C_ROV6-5_Grain_92 A	common lead	25.1461	10904.7	144.909	0.289889	-26.3826	-8.85031	75.7841	2.18888	0.340237	2.87657	0.869969	3.02409	1.09203	3.52446	0.0178629	2.01971	0.879917	0.0727291	3.67215	3129.88	124.092	124.092	113.849	4.56012	5.26518	623.103	38.3525	40.616	1375.48	99.2639	107.024
13C_ROV6-5_Grain_92 B	13C_ROV7-1_Grain_137	4.07359	16752.7	441.372	0.398562	-67.356	-5.40007	125.65	0.872228	0.046537	1.90752	0.12824	2.43276	0.0511094	1.72844	0.00829248	0.862982	0.0323761	0.00255313	2.17454	749.185	53.3659	53.3659	53.225	0.914761	1.53749	50.4649	1.71489	2.10401	51.517	2.23794	2.70718
13C_ROV6-5_Grain_104 A	common lead	21.1917	6246.72	73.6902	0.425143	-17.3297	-8.01458	66.3726	2.22856	0.434095	2.22628	1.1764	2.31272	1.2312	2.42237	0.0188859	1.67456	0.689249	0.0567826	2.46543	3651.88	80.3651	80.3651	120.625	4.02128	4.89973	740.728	30.5813	34.29	1103.86	53.5857	62.5008
13C_ROV6-5_Grain_104 B	common lead	14.3215	7510.77	87.9026	0.526744	-19.2365	-8.69385	72.7102	2.4107	0.414027	2.60066	1.09698	2.64223	1.2589	3.04213	0.0185723	1.93639	0.81298	0.0473432	3.12206	3419.15	112.621	112.621	118.346	4.54346	5.30326	713.553	37.3657	40.298	924.182	57.0017	63.0831
13C_ROV6-5_Grain_103 A	13C_ROV7-1_Grain_137	12.0489	6222.55	135.96	0.728502	-22.9519	-6.06657	121.066	1.28553	0.0856314	3.10684	0.364501	2.95339	0.101616	2.92971	0.00896347	1.21695	0.0809369	0.00411559	2.39084	1689.98	88.4632	88.4632	57.4984	1.39331	1.92947	96.3753	5.43667	5.89541	82.9466	3.95853	4.65575
13C_ROV6-5_Grain_103 B	13C_ROV7-1_Grain_137	18.498	6418.04	149.707	0.753125	-24.5102	-5.78465	127.913	1.22029	0.0512963	3.20276	0.26805	3.03725	0.0564097	2.99536	0.00845451	1.15494	0.0291174	0.00277298	2.55923	1190.77	78.8283	78.8283	54.2511	1.24793	1.77315	55.5824	3.31179	3.57957	55.9351	2.85942	3.30321
13C_ROV6-5_Grain_102	13C_ROV7-1_Grain_137	10.0287	10447.8	254.105	0.445639	-40.0768	-5.74406	129.547	0.989339	0.047837	2.31558	0.140081	3.25551	0.0527677	2.18897	0.00809918	0.945894	0.0726375	0.00226836	2.82938	920.529	66.8765	66.8765	51.9873	0.979557	1.55469	52.0493	2.216	2.54121	45.7677	2.58762	2.9203
13C_ROV6-5_Grain_101 A	13C_ROV7-1_Grain_137	-12.9562	3269.92	72.2786	0.493219	-12.7407	-7.62247	137.811	2.1949	0.0508871	6.43604	0.301575	24.8611	0.0563585	5.76712	0.00884849	1.69284	0.939704	0.00337682	5.80611	1617.57	109.746	109.746	56.7404	1.91269	2.32237	51.1863	5.79868	5.92882	67.8698	7.85221	8.10336
13C_ROV6-5_Grain_101 B	13C_ROV7-1_Grain_137	4.66605	4773.69	87.9035	0.587371	-16.4812	-6.68486	109.009	1.90758	0.207447	2.78775	0.640917	3.15154	0.299986	2.41064	0.0108011	1.51721	0.311762	0.0107168	2.5169	2776.75	74.0734	74.0734	69.1954	2.08888	2.6343	256.992	11.6371	13.0614	214.954	10.7775	12.503
13C_ROV6-5_Grain_101 C	13C_ROV7-1_Grain_137	-36.0549	3141.97	75.2563	0.499506	-11.093	-6.49025	139.901	2.06788	0.0538456	6.17397	0.235586	7.54582	0.0540631	5.52576	0.00861322	1.70716	0.0639471	0.0029861	5.37321	1667.19	106.683	106.683	55.2391	1.87809	2.27421	51.6639	5.82552	5.96779	60.0864	6.45853	6.69909
13C_ROV6-5_Grain_100 A	13C_ROV7-1_Grain_137	8.46884	12246.4	304.157	0.990891	-44.0471	-5.95634	125.252	0.844479	0.0484225	2.14028	0.314727	1.841	0.0540956	2.00365	0.00831576	0.849653	0.0447476	0.00253922	1.55718	879.558	62.0075	62.0075	53.3741	0.903188	1.53345	53.3646	2.10347	2.46746	51.2472	1.59402	2.19923
13C_ROV6-5_Grain_100 B	13C_ROV7-1_Grain_137	13.9964	14792.7	376.596	1.06278	-57.2435	-5.67811	125.277	0.803173	0.0500466	1.95477	0.344125	1.55735	0.0561079	1.86183	0.00825283	0.801377	0.0695408	0.00259289	1.38124	847.951	57.4139	57.4139	52.9731	0.845526	1.4926	55.0838	1.9987	2.39468	52.3312	1.44371	2.11605
13C_ROV6-5_Grain_100 C	13C_ROV7-1_Grain_137	22.5981	6492.1	154.188	0.771484	-20.7044	-6.90601	123.813	1.25625	0.052416	3.1893	0.278018	2.82508	0.0612388	2.96729	0.00874792	1.16902	0.0181207	0.00287065	2.33988	1233.62	82.185	82.185	56.1242	1.30671	1.84541	59.3183	3.44778	3.73165	57.9074	2.7066	3.20267
13C_ROV6-5_Grain_142 A	13C_ROV7-1_Grain_137	8.00981	12111.4	319.65	0.752999	-42.1058	-6.21971	129.71	0.930926	0.0486443	2.2309	0.236621	2.25888	0.0538417	2.07414	0.00806066	0.924013	-0.0325424	0.00241906	2.06	919.326	68.4501	68.4501	51.7417	0.952318	1.53316	52.852	2.13919	2.48635	48.818	2.00926	2.47416
13C_ROV6-5_Grain_142 B	13C_ROV7-1_Grain_137	16.4801	9004.65	240.928	0.642584	-29.2546	-6.52346	133.841	1.01544	0.0484356	2.59653	0.210753	2.69226	0.0518582	2.48827	0.00789624	0.980397	0.103616	0.00242573	2.33132	1010.29	71.9562	71.9562	50.6893	0.990057	1.53825	51.3897	2.5358	2.82809	48.9476	2.27979	2.70046
13C_ROV6-5_Grain_143 A	13C_ROV7-1_Grain_137	40.799	4453.12	112.829	0.202239	-16.6904	-6.32856	135.219	1.679	0.0547649	4.35378	0.0878484	9.74172	0.0594406	3.80326	0.00840903	1.41994	0.0728115	0.00256108	8.61273	1438.14	90.4524	90.4524	53.9497	1.52568	1.97401	57.0205	4.30638	4.52552	51.9169	8.94138	9.07245
13C_ROV6-5_Grain_143 B	13C_ROV7-1_Grain_137	6.6761	7752.64	192.301	0.445751	-25.9869	-6.51307	124.37	1.17249	0.0563704	2.90175	0.167824	3.4842	0.0631764	2.64896	0.00861882	1.12656	0.0450569	0.00291693	3.06644	1198.22	79.2693	79.2693	55.3015	1.24071	1.78544	61.6994	3.20407	3.53194	58.8155	3.6028	4.00054
13C_ROV6-5_Grain_143 C	13C_ROV7-1_Grain_137	30.0437	6488.53	153.37	0.355369	-21.8982	-6.4956	118.545	1.35632	0.097871	3.27272	0.276805	4.0996	0.12755	3.37502	0.00926459	1.25356	0.223192	0.00723296	3.9621	1859.6	98.9028	98.9028	59.4185	1.48299	2.02516	117.815	7.49111	7.97203	145.098	11.4459	12.2185
238U/235U	137.818
BeamSecondsMaximum	60
BeamSecondsMethod	Laser log
BeamSecondsSensitivity	1000
DefaultFitType	Exponential
FitEndCrop	1
FitStartCrop	1
IndexChannel	U238
MaskChannel	U238
MaskMethod	Laser log
MaskResults	TRUE
MaskThreshold	1000
MaskTrim	0
ReferenceMaterial	Z_91500
UIsotopeCutoff	2000000
UIsotopeMode	U238
l232	4.9475e-11
l235	9.8485e-10
l238	1.55125e-10
