# Supplementary material for: Inherited Continental Zircons in Oceanic Rocks – True or False
Source: Research Square preprint supplement (doi:10.21203/rs.3.rs-778290/v1), 2021-08-11
Supplement: Supplementary file 2 [file b21ce30ae39b9fedabcf98ab.xlsx]

## Sheet: Mohn's Ridge
Zircon spot	U (ppm)	Th (ppm)	Alpha-fluences (α/mg)	Age		Measured FWHM	Corrected FWHM	Peak top cm-1	Radiation damage age
GS16A-ROV06-16-02-3	606.362	710.673	1.03473e+13	4.10591	Ma	3.7828	2.51189	1009.01	-	Ma
GS16A-ROV06-16-03-3	49.262	25.3136	9.91047e+11	5.51856	Ma	3.15378	1.39511	1009.34	-	Ma
GS16A-ROV06-16-04-3	540.854	395.606	1.19771e+15	553.569	Ma	10.7987	10.4217	1001.24	297.9	Ma
GS16A-ROV06-16-05-3	227.488	106.676	1.62183e+15	1672.3	Ma	6.58453	5.94609	1005.48	391.1	Ma
GS16A-ROV06-16-06-3	63.9376	72.3169	9.30709e+11	3.52965	Ma	3.46728	2.0055	1009.19	-	Ma
GS16A-ROV06-16-08-3	399.508	53.1627	1287206407478486	882.818	Ma	4.50793	3.51019	1007.45	139.4	Ma
GS16A-ROV06-16-09-3	127.287	80.5903	1.34879e+15	2245.82	Ma	11.0845	10.7176	1004.32	1223	Ma
GS16A-ROV06-16-10-3	185.595	226.081	1.87678e+15	2002.34	Ma	6.14863	5.45946	1004.19	378	Ma
GS16A-ROV06-16-11-3	8.26252	6.50994	6.23549e+11	*	Ma	3.39843	1.88397	1009.63	-	Ma
GS16A-ROV06-16-13-3	358.9	195.804	2.18589e+15	1444.75	Ma	14.9692	14.6996	997.982	691.5	Ma
GS16A-ROV06-16-14-3	423.962	78.3181	1.59897e+15	1008.51	Ma	6.18405	5.49932	1007.77	208.5	Ma
GS16A-ROV06-16-08-1	23.8528	32.3651	4.37903e+11	4.06715	Ma	3.82116	1.44957	**	-	Ma
GS16A-ROV06-16-10-1	49.8158	30.32	8.02055e+11	4.14433	Ma	4.36697	2.56328	**	-	Ma
GS16A-ROV06-16-29-1	81.5545	56.4053	1133739784157557	2724.37	Ma	8.0852	7.27121	**	1206	Ma
GS16A-ROV06-16-22-2	25.14	19.59	4.25785e+11	4.39775	Ma	4.0632	2.0024	**	-	Ma
GS16A-ROV06-16-27-2	39.38	30.77	8.08882e+11	5.33083	Ma	3.86953	1.57266	**	-	Ma
GS16A-ROV06-16-51-2	178	102.7	1.44901e+15	1835.52	Ma	5.68589	4.45302	**	358.4	Ma
GS16A-ROV06-16-55-2	309.4	99.7	1267914624885526	1059.04	Ma	10.6083	10.0018	**	528.5	Ma
* Very low Pb-content, unreliable U-Pb age
** Not reported

## Sheet: Gjallar Ridge
Zircon spot	U (ppm)	Th (ppm)	Alpha-fluences (α/mg)	Age		Measured FWHM	Corrected FWHM	Peak top cm-1	Radiation damage age
13C-ROV7-1-1	177.523	34.017	9.70043e+13	158.692	Ma	4.53449	2.8393	1008.11	246	Ma
13C-ROV7-1-4	290.029	37.1681	53391373742878	54.7686	Ma	4.55131	2.86608	1008.22	155.2	Ma
13C-ROV7-1-5 rim	215.848	35.8226	4.11746e+13	56.2528	Ma	3.77874	1.33375	1008.42	94.55	Ma
13C-ROV7-1-5 core	325.014	169.51	4.30102e+14	351.512	Ma	4.38351	2.59136	1008.3	114.75	Ma
13C-ROV7-1-8 core	121.875	45.6358	1.12311e+15	2089.07	Ma	3.75311	1.2593	1008.36	150	Ma
13C-ROV7-1-9 rim	143.199	24.1666	2.85054e+13	58.6507	Ma	3.81552	1.43464	1008.45	152.7	Ma
13C-ROV7-1-9 core	276.991	122.068	1.02606e+14	102.347	Ma	3.58777	0.609995	1008.22	31.55	Ma
13C-ROV7-1-15	159.396	41.5673	3.13643e+13	56.7885	Ma	5.39802	4.07905	1007.75	389	Ma
13C-ROV7-1-19	132.345	39.3159	2.66474e+13	57.6356	Ma	5.15114	3.74623	1007.62	423.1	Ma
13C-ROV7-1-24	207.284	26.5459	4.1907e+13	60.1198	Ma	3.5304	-	1008.58	-	Ma
13C-ROV7-1-28	186.588	46.2547	4.69302e+13	72.6944	Ma	3.49698	-	1008.47	-	Ma
13C-ROV7-1-33	179.375	50.5629	5.19495e+13	82.9931	Ma	4.58176	2.91419	1008.32	244.6	Ma
13C-ROV7-1-35	126.233	35.3768	2.69825e+13	61.3954	Ma	4.17827	2.22664	1008.37	262.5	Ma
13C-ROV7-1-37 rim	189.13	38.0231	3.77834e+13	58.43	Ma	4.77736	3.21297	1008.11	261.2	Ma
13C-ROV7-1-37 core	778.329	374.294	7.85354e+14	272.254	Ma	5.43735	4.13095	1007.49	79.13	Ma
13C-ROV7-1-40	227.872	120.256	5.98838e+13	71.4665	Ma	4.76137	3.18914	1008.25	201.45	Ma
13C-ROV7-1-41	253.494	38.1176	4.57075e+13	53.3768	Ma	5.1266	3.71242	1008.12	201.45	Ma
13C-ROV7-1-43	108.214	18.1968	2.08186e+13	56.7016	Ma	4.33938	2.51599	1008.52	353.3	Ma
13C-ROV7-1-48 core	1429.64	333.861	5.07876e+14	102.726	Ma	5.81075	4.61138	1006.5	51.29	Ma
13C-ROV7-1-49	130.042	29.1831	2.47382e+13	55.3607	Ma	5.06717	3.62991	1007.95	423.1	Ma
13C-ROV7-1-75	108.224	23.4455	2.32173e+13	62.5011	Ma	5.10504	3.68259	1008.19	512.6	Ma
13C-ROV7-1-76	79.3287	27.437	3.64821e+13	129.393	Ma	4.20093	2.26888	1008.46	413.9	Ma
13C-ROV7-1-101 rim	133.085	28.3613	2.58437e+13	56.6503	Ma	4.3597	2.55088	1008.42	290.2	Ma
13C-ROV7-1-101 core	99.749	62.4699	5.82608e+14	1374.79	Ma	3.57359	0.52014	1008.71	71.5	Ma
13C-ROV7-1-102 rim	102.72	17.7065	1.93044e+13	55.3429	Ma	5.58773	4.32698	1008.42	639.2	Ma
13C-ROV7-1-102 core	278.362	166.5	4.3516e+14	406.717	Ma	5.38625	4.06346	1007.7	209.75	Ma
13C-ROV7-1-103 rim	125.213	27.7799	2.3926e+13	55.6387	Ma	4.7693	3.20097	1008.45	386.5	Ma
13C-ROV7-1-103 core	419.534	109.616	3.10959e+14	210.899	Ma	4.70127	3.0987	1008.2	113.37	Ma
13C-ROV7-1-117 rim	196.092	34.7906	3.72873e+13	55.9291	Ma	5.15047	3.74531	1008.1	296.6	Ma
13C-ROV7-1-117 core	141.384	39.7101	126503672420776	252.515	Ma	3.77409	1.32051	1008.52	138.7	Ma
13C-ROV7-1-118 rim	224.241	24.7803	3.80047e+13	50.6486	Ma	4.41295	2.64086	1008.58	184.55	Ma
13C-ROV7-1-118 core	163.798	53.035	1.61126e+15	2213.44	Ma	4.03554	1.94566	1008.41	175.8	Ma
13C-ROV7-1-121 core	780.429	551.89	8.1335e+14	268.481	Ma	5.48064	4.18777	1007.25	76.4	Ma
13C-ROV7-1-126	52.9553	36.7641	3.99958e+14	1694.63	Ma	3.66241	0.95564	1008.95	242	Ma
13C-ROV7-1-129 rim	281.357	38.5958	5.33496e+13	56.2872	Ma	4.91991	3.42133	1008.5	191.5	Ma
13C-ROV7-1-129 core	382.927	214.437	466972904654037	322.201	Ma	3.99033	1.85006	1008.07	68.5	Ma
13C-ROV7-1-130 rim	149.55	31.1706	2.80412e+13	54.7673	Ma	4.95999	3.47872	1008.42	355.3	Ma
13C-ROV7-1-130 core	726.871	619.212	2.27595e+15	751.081	Ma	5.52513	4.24583	1008.08	80.83	Ma
13C-ROV7-1-132 rim	138.115	22.8631	2.6765e+13	57.1473	Ma	5.04596	3.60024	1008.24	401	Ma
13C-ROV7-1-132 core	105.354	55.1186	5.09301e+14	1184.26	Ma	3.84734	1.51724	1008.68	202.4	Ma
13C-ROV7-1-133 rim	350.986	47.3198	7.79898e+13	65.9377	Ma	4.63989	3.00476	1008.44	134.76	Ma
13C-ROV7-1-133 core	807.664	446.228	1.26816e+15	412.142	Ma	4.90963	3.40653	1008	61.35	Ma
13C-ROV7-1-134 rim	265.212	48.7996	5.38031e+13	59.5595	Ma	4.12005	2.11538	1008.53	122.67	Ma
13C-ROV7-1-134 core	486.038	420.504	1.06545e+14	55.7153	Ma	4.21407	2.29312	1007.56	63.3	Ma
13C-ROV7-1-135	249.448	45.9484	4.87256e+13	57.3565	Ma	4.20203	2.27092	1007.73	140.1	Ma
13C-ROV7-1-136	253.566	62.3709	5.08886e+13	58.1065	Ma	3.78448	1.34992	1007.97	80.15	Ma
13C-ROV7-1-142	214.362	77.9017	4.26511e+13	56.1333	Ma	5.2916	3.93713	1007.72	275.1	Ma
13C-ROV7-1-143	149.555	57.1964	3.04945e+13	57.2806	Ma	4.15691	2.1863	1008.48	213.6	Ma
13C-ROV6-5-1 core	78.9916	22.049	5.01147e+14	1563.87	Ma	4.12794	2.1307	1008.34	396	Ma
13C-ROV6-5-4 core	199.107	36.0711	9.45054e+13	138.431	Ma	4.78328	3.22176	1008.12	250.2	Ma
13C-ROV6-5-5 rim	188.947	23.4831	3.48633e+13	54.943	Ma	5.29786	3.94554	1008.25	328.2	Ma
13C-ROV6-5-5 core	391.01	98.3246	2.45782e+15	1558.94	Ma	4.6925	3.08538	1007.98	121.26	Ma
13C-ROV6-5-6	73.1727	27.5451	1.43579e+14	528.594	Ma	4.98243	3.51064	1008.78	685	Ma
13C-ROV6-5-7	97.7636	21.3326	1.87583e+13	55.9141	Ma	3.90551	1.65922	1008.65	254.2	Ma
13C-ROV6-5-8 core	254.125	256.717	255115608765149	244.238	Ma	4.64578	3.01385	1008.03	155.2	Ma
13C-ROV6-5-36	152.634	53.9467	7.9826e+13	146.676	Ma	3.9831	1.83442	1008.42	176.4	Ma
13C-ROV6-5-42	78.3945	17.4637	1.4369e+13	53.3702	Ma	4.93396	3.44151	1007.79	649.3	Ma
13C-ROV6-5-46 rim	185.157	37.3029	4.40245e+13	69.4659	Ma	4.28345	2.41825	1008.78	199.5	Ma
13C-ROV6-5-46 core	65.5132	55.1401	4.49027e+14	1525.67	Ma	4.42942	2.66829	1008.45	530.5	Ma
13C-ROV6-5-48 rim	151.407	39.3981	3.07952e+13	58.6974	Ma	3.98044	1.82863	1008.79	180.8	Ma
13C-ROV6-5-48 core	371.887	375.535	7.94319e+13	52.7909	Ma	4.85548	3.32802	1007.32	118.05	Ma
13C-ROV6-5-55	173.921	71.4342	1.34648e+14	213.165	Ma	3.72914	1.18595	1008.52	98.6	Ma
13C-ROV6-5-60	90.0136	24.8583	1.69839e+13	54.2792	Ma	3.94888	1.75888	1008.31	288.3	Ma
13C-ROV6-5-72	162.148	124.257	3.51958e+13	56.2646	Ma	4.51471	2.8076	1008.09	235.3	Ma
13C-ROV6-5-75	104.361	21.2391	1.95043e+13	54.6504	Ma	4.82564	3.28433	1007.73	474.4	Ma
13C-ROV6-5-76	153.573	59.8169	7.41429e+14	1211.05	Ma	3.78789	1.35945	1008.45	128.6	Ma
13C-ROV6-5-81 rim	140.425	30.6012	2.62361e+13	54.456	Ma	4.23637	2.33384	1008.61	251.4	Ma
13C-ROV6-5-81 core	437.935	280.356	7.34804e+14	431.844	Ma	4.23298	2.32769	1008.32	74.6	Ma
13C-ROV6-5-82	184	54.6319	4.64086e+14	680.936	Ma	5.07063	3.63473	1007.8	298.2	Ma
13C-ROV6-5-83	105.216	18.1924	1.96547e+13	55.0055	Ma	5.29543	3.94228	1008.11	569	Ma
13C-ROV6-5-84	159.232	34.679	2.97966e+13	54.5425	Ma	4.39169	2.60518	1008.2	248.6	Ma
13C-ROV6-5-85	138.533	29.7872	2.5881e+13	54.4882	Ma	3.69934	1.08863	1008.22	118.3	Ma
13C-ROV6-5-86	105.886	20.5327	1.96994e+13	54.5218	Ma	4.06379	2.00359	1008.44	285.5	Ma
13C-ROV6-5-90	170.915	48.468	3.22099e+13	54.1251	Ma	5.30809	3.95927	1008.09	350.75	Ma
13C-ROV6-5-100	372.199	409.36	8.17377e+13	53.3524	Ma	5.05944	3.61911	1009.25	126.55	Ma
13C-ROV6-5-106	114.985	31.2952	2.05246e+13	51.4088	Ma	4.51611	2.80985	1008.4	364	Ma
13C-ROV6-5-110 rim	84.2356	18.2467	1.57912e+13	54.655	Ma	4.40477	2.62717	1008.54	464.5	Ma
13C-ROV6-5-110 core	92.9688	130.186	8.59915e+14	1815.9	Ma	4.16584	2.20323	1008.59	282.4	Ma
13C-ROV6-5-111 rim	102.076	21.3422	2.0105e+13	57.5072	Ma	4.42841	2.66661	1008.55	392.7	Ma
13C-ROV6-5-111 core	580.813	500.082	8.33438e+14	355.884	Ma	4.19789	2.26325	1007.93	52.35	Ma
13C-ROV6-5-113 rim	100.727	21.6795	3.42454e+13	98.754	Ma	4.72305	3.13165	1008.25	466.7	Ma
13C-ROV6-5-113 core	325.339	141.482	2.25157e+15	1640.12	Ma	5.50979	4.22585	1008.04	193.9	Ma
13C-ROV6-5-114 rim	84.4642	19.3828	1.59793e+13	54.9944	Ma	4.3083	2.462	1008.67	433.1	Ma
13C-ROV6-5-114 core	264.596	128.045	5.76391e+14	571.463	Ma	4.14437	2.16236	1008.21	117.8	Ma
13C-ROV6-5-115	140.265	42.4046	5.0942e+13	103.412	Ma	4.56464	2.8872	1008.5	306.6	Ma
13C-ROV6-5-118 rim	121.069	23.451	2.26721e+13	54.8812	Ma	5.07565	3.64173	1008.61	457.6	Ma
13C-ROV6-5-118 core	125.946	35.592	2.44387e+13	55.7332	Ma	4.44912	2.70086	1008.47	319.5	Ma
13C-ROV6-5-121	11.6674	4.53183	4.20013e+13	930.027	Ma	4.15223	2.17739	1008.48	2194	Ma
13C-ROV6-5-122 rim	121.643	17.829	2.27308e+13	55.3556	Ma	4.71527	3.1199	1008.59	393.6	Ma
13C-ROV6-5-122 core	220.311	179.348	4.66684e+13	54.3941	Ma	4.5705	2.89646	1008.52	178.1	Ma
13C-ROV6-5-123 rim	110.813	28.9399	2.08137e+13	54.2158	Ma	4.41155	2.63852	1008.5	355	Ma
13C-ROV6-5-124 rim	100.115	20.1091	1.89453e+13	55.3651	Ma	3.69405	1.07052	1008.85	160.8	Ma
13C-ROV6-5-126	119.821	25.4323	2.22895e+13	54.2902	Ma	5.24512	3.87444	1007.18	490.1	Ma
13C-ROV6-5-129 rim	120.294	21.5916	2.3071e+13	56.381	Ma	4.26059	2.37753	1008.45	300.4	Ma
13C-ROV6-5-129 core	349.993	315.634	3.29911e+14	234.347	Ma	4.0318	1.93789	1008.22	73.3	Ma
13C-ROV6-5-130	125.564	38.5695	2.43536e+13	55.4059	Ma	3.73983	1.21915	1008.41	143.1	Ma
13C-ROV6-5-134 rim	201.264	150.304	1.60237e+14	204.598	Ma	4.37829	2.58252	1008.29	175.4	Ma
13C-ROV6-5-135 rim	88.1652	17.4636	1.64828e+13	54.7357	Ma	6.11572	4.99019	1008.42	845.3	Ma
13C-ROV6-5-139 rim	187.891	22.1224	1.27708e+14	199.972	Ma	4.15027	2.17365	1008.11	179.8	Ma
13C-ROV6-5-139 core	590.026	758.969	7.56662e+14	295.23	Ma	4.40568	2.62869	1007.49	55.5	Ma
13C-ROV6-5-147 rim	97.1866	27.3028	1.90797e+13	56.4055	Ma	6.22465	5.12311	1007.43	780.2	Ma
13C-ROV6-5-147 core	599.949	148.57	2.65111e+14	127.092	Ma	4.41524	2.64468	1008.36	67.7	Ma
13C-ROV6-5-148	160.42	90.2227	3.07084e+13	51.7663	Ma	4.55502	2.87197	1008.63	253.5	Ma
13C-ROV6-5-152 core	124.906	67.9357	4.26932e+13	92.4667	Ma	4.70765	3.10837	1008.52	351.8	Ma
13C-ROV6-5-154 rim	91.7369	22.1482	1.67446e+13	52.9264	Ma	5.42356	4.11279	1008.4	666.2	Ma
13C-ROV6-5-154 core	503.91	129.606	3.21724e+14	182.308	Ma	5.52765	4.24911	1007.03	131.65	Ma
13C-ROV6-5-155 rim	261.369	34.3401	4.80088e+13	54.6074	Ma	4.57617	2.9054	1007.84	174.2	Ma
13C-ROV6-5-155 core	203.455	111.916	4.40691e+13	58.6923	Ma	5.49904	4.21182	1007.93	298.7	Ma
13C-ROV6-5-156 rim	78.9449	16.6108	1.50998e+13	55.8368	Ma	4.93995	3.45009	1008.21	648.2	Ma
13C-ROV6-5-156 core	198.947	117.85	8.08351e+14	1000.52	Ma	4.38518	2.59419	1008.11	190	Ma
13C-ROV6-5-158 rim	87.1516	16.0188	1.59649e+13	53.8118	Ma	4.69868	3.09477	1008.63	533.5	Ma
13C-ROV6-5-158 core	160.745	229.737	1432167822289469	1752.81	Ma	3.5731	0.516763	1008.45	37.9	Ma
13C-ROV6-5-161	87.6358	35.6055	3.33042e+13	105.75	Ma	4.03719	1.94908	1008.61	319	Ma
13C-ROV6-5-162 rim	112.481	28.694	2.09251e+13	53.7729	Ma	4.41918	2.65125	1008.41	352	Ma
13C-ROV6-5-164	160.994	57.6058	3.16608e+13	55.5529	Ma	3.76666	1.29913	1008.62	118	Ma
13C-ROV6-5-166 rim	621.423	677.615	1.39367e+14	54.5769	Ma	3.93644	1.73077	1008.54	35.57	Ma
* Peak position for sample 13C-ROV6-5 has been corrected for 1.8 cm due to calibration differences

## Sheet: Reference materials
Zircon spot	Measured FWHM	Corrected FWHM	Peak top cm-1
91500-1	4.61829	2.9713	1007.85
91500-2	4.75556	3.18046	1007.71
91500-3	4.59919	2.94152	1007.83
GJ1-1	7.42855	6.53325	1005.12
GJ1-2	7.86372	7.02411	1004.71
GJ1-3	7.75414	6.90121	1004.74
Mud Tank-1	3.59422	0.646852	1009.26
Mud Tank-2	3.58612	0.600214	1009.29
Mud Tank-3	3.58122	0.570208	1009.3
Plesovice-1	9.68969	9.02165	1002.96
Plesovice-2	10.262	9.63372	1002.89
Plesovice-3	8.96246	8.23564	1003.42
* Peak position for the standards has been corrected for 1.8 cm due to calibration differences
