# Supplementary material for: Inherited Continental Zircons in Oceanic Rocks – True or False
Source: Research Square preprint supplement (doi:10.21203/rs.3.rs-778290/v1), 2021-08-11
Supplement: Supplementary file 3 [file e68546cbda43f6215bb5657a.docx]

Supplementary Table 3: Instrumentation and operational settings for U-Pb dating

| **Laboratory & Sample Preparation** |  |
| --- | --- |
| Laboratory name | Department of Earth Science, University of Bergen |
| Sample type/mineral | Zircon |
| Sample preparation | Conventional mineral separation, 2.5 cm resin mount, 0.025 m polish to finish |
| Imaging | CL, Zeiss Supra55 VP, 15 kV, 1 nA, 15mm working distance |
| **Laser ablation system** |  |
| Make, Model & type | RESOlution M-50 LR with a Coherent COMPexPRO® 110 193 nm ArF excimer laser |
| Ablation cell & volume | Two volume |
| Laser wavelength | 193 nm |
| Pulse duration | 20 ns |
| Fluence | 2.2 - 2.5 J.cm-2 |
| Repetition rate | 5 Hz |
| Ablation duration | 30 secs |
| Spot diameter | 26 µm |
| Sampling mode/pattern | Static spot ablation/circular |
| Carrier gas | He (0.75 l/min) with small amounts of N2 (0.004 ml/min) mixed in before entering the ICP-MS to increase sensitivity. |
| Signal smoothing device | “Squid” connected between the laser and the ICP-MS |
| **ICP-MS Instrument** |  |
| Make, Model & type | Nu Instruments, Nu Attom HR, SC-ICP-MS |
| Sample introduction | Ablation aerosol from laser ablation |
| RF power | 1300W |
| Cool gas | Ar 13 l/min |
| Aux gas | Ar 0.7 l/min |
| Make-up gas flow | Ar 0.49 l/min |
| Detection system | MasCom Electron Multiplier |
| Masses measured | 202Hg, 204(Hg + Pb), 206Pb, 207Pb, 208Pb, 232Th, 238U |
| Integration time per peak/dwell times | 200µs for 202Hg, 204(Hg + Pb), 206Pb,  208Pb, 232Th, 238U  800 µs for 207Pb and 235U |
| Number of sweeps per cycle | 10 |
| Total time per cycle | 0.0493 s |
| Analysis method | Deflector jump |
| IC Dead time | 14 ns |
| Detection Mode | Ion counting mode and ion-attenuated mode |
| **Data Processing** |  |
| Gas blank | 15 s |
| Calibration strategy | 91500 1065 Ma1 used as primary reference material, while Plesovice 337 Ma2, Mud Tank 731.8 Ma3, & GJ1 609 Ma4 are used as secondaries for validation. |
| Data processing package used / Correction for LIEF | Iolite4 (v. 4.4.5) for data normalization, uncertainty propagation, and age calculation. LIEF correction assumes reference material and samples behave identically. |
| Common-Pb correction | No common-Pb correction was applied to the data. |
| Data reduction | VizualAge UComPbine5 |
| Down-hole correction model | Exponential or Exponential + linear |
| Blank and instrumental bias correction | Spline_AutoSmooth |
| Uncertainty level & propagation | Ages are quoted at 2*s* absolute, propagation is by quadratic addition. |
| Quality control / Validation | Run1 – Mount1:  Plesovice – Wtd ave 206Pb/238U age = 334 ± 1 (2*s*, MSWD = 7.39, n=4)  GJ-1 – Wtd ave 206Pb/238U age = 600 ± 2 (2*s*, MSWD = 6.42, n=4)  91500 – Wtd ave 206Pb/238U age = 1062 ± 2 (2*s*, MSWD = 0.85, n=4)  Run2 – Mount2:  Plesovice – Wtd ave 206Pb/238U age = 353 ± 1 (2*s*, MSWD = 13.7, n=10)  GJ-1 – Wtd ave 206Pb/238U age = 630 ± 1 (2*s*, MSWD = 7.22, n=12)  91500 – Wtd ave 206Pb/238U age = 1062 ± 1 (2*s*, MSWD = 0.30, n=12)  Run3 – Mount3:  Plesovice – Wtd ave 206Pb/238U age = 351 ± 1 (2*s*, MSWD = 2.48, n=11)  GJ-1 – Wtd ave 206Pb/238U age = 618 ± 1 (2*s*, MSWD = 3.50, n=12)  91500 – Wtd ave 206Pb/238U age = 1063 ± 1 (2*s*, MSWD = 0.80, n=16)  Mud tank - Wtd ave 206Pb/238U age = 728 ± 2 (2*s*, MSWD = 0.44, n=12)  Run4 – Mount4:  Plesovice – Wtd ave 206Pb/238U age = 345 ± 1 (2*s*, MSWD = 6.70, n=65)  GJ-1 – Wtd ave 206Pb/238U age = 610 ± 1 (2*s*, MSWD = 5.98, n=65)  91500 – Wtd ave 206Pb/238U age = 1062 ± 1 (2*s*, MSWD = 0.92, n=63) |
| Data reporting | Reported in the format recommended by Horstwood 3 using a python script made by Joe Petrus (<https://github.com/iolite-LA-ICP-MS/iolite4-python-examples/blob/master/export/PlasmAge.py>). |
| Data visualization | Plotting of KDE using IsoplotR6. |

1. Wiedenbeck M*, et al.* Three Natural Zircon Standards for U-Th-Pb, Lu-Hf, Trace Element and Ree Analyses. *Geostandards and Geoanalytical Research*, **19**, 1-23 (1995)

2. Sláma J*, et al.* Plešovice zircon — A new natural reference material for U–Pb and Hf isotopic microanalysis. *Chemical Geology*, **249**, 1-35 (2008)

3. Horstwood MSA*, et al.* Community-Derived Standards for LA-ICP-MS U-(Th-)Pb Geochronology – Uncertainty Propagation, Age Interpretation and Data Reporting. *Geostandards and Geoanalytical Research*, **40**, 311-332 (2016)

4. Jackson SE, Pearson NJ, Griffin WL, Belousova EA. The application of laser ablation-inductively coupled plasma-mass spectrometry to in situ U–Pb zircon geochronology. *Chemical Geology*, **211**, 47-69 (2004)

5. Chew DM, Petrus JA, Kamber BS. U–Pb LA–ICPMS dating using accessory mineral standards with variable common Pb. *Chemical Geology*, **363**, 185-199 (2014)

6. Vermeesch P. IsoplotR: A free and open toolbox for geochronology. *Geoscience Frontiers*, **9**, 1479-1493 (2018)
